# Supplementary material for: Chloride Induced S–C bond selective cleavage of disulfides to access unsymmetrical β-fluorodisulfides
Source: Royal Society of Chemistry journal article supplement (doi:10.1039/d4cc04065a), 2024-01-01

## **Chloride Induced S-C bond Selective Cleavage of Disulfides to Access Unsymmetrical $\beta$ -Fluorodisulfides**

Tengfei Niu\*, Jiayuan Zhang, Yunpeng He, Mei Hong, Lei Zhu, Yu Lan\*

|                                                                  |           |
|------------------------------------------------------------------|-----------|
| <b>1. General Methods .....</b>                                  | <b>1</b>  |
| <b>2. Experimental Section .....</b>                             | <b>2</b>  |
| <b>3. Optimization of reaction conditions .....</b>              | <b>3</b>  |
| <b>4. Additional evidence for the structure of product. ....</b> | <b>4</b>  |
| <b>5. MS study of the module reaction.....</b>                   | <b>6</b>  |
| <b>6. Density functional theory (DFT) calculations.....</b>      | <b>6</b>  |
| <b>7. Characterization data.....</b>                             | <b>17</b> |
| <b>8. Compound data.....</b>                                     | <b>28</b> |

## 1. General Methods

All chemicals were commercially available and used without further purification. Analytical thin-layer chromatography were performed on glass plates precoated with silica gel impregnated with a fluorescent indicator (254 nm). The plates were visualized by exposure to ultraviolet light. <sup>1</sup>H NMR spectra were recorded on Bruker DRX400 (400 MHz) and <sup>13</sup>C NMR spectra on BrukerDRX400 (101 MHz) spectrometer. HRMS were taken on a Bruker microtof II in the electrospray ionization (ESI) mode.

## 2. Experimental Section

### Preparation of vinylestrone B47<sup>1</sup>

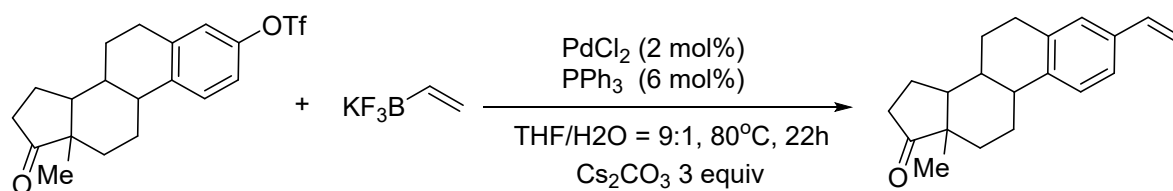

A 2-neck 100 mL round-bottom flask was charged with 3-(trifluoromethanesulfonyl)estrone (1.5g, 3.72 mmol), potassium vinyltrifluoroborate (600 mg, 4.47 mmol), PdCl<sub>2</sub> (12.8 mg, 0.074 mmol), PPh<sub>3</sub> (60 mg, 0.221 mmol) and Cs<sub>2</sub>CO<sub>3</sub> (3.75 g, 11.3 mmol), then THF (6.8 mL) and H<sub>2</sub>O (0.8 mL) was added to the mixture under N<sub>2</sub>. The reaction mixture was stirred at 80 °C for 22 h. After cooling to room temperature, the resulting reaction mixture was washed with H<sub>2</sub>O, dried (Na<sub>2</sub>SO<sub>4</sub>), and filtered. The filtrate was concentrated in vacuo and the residue was purified by flash column chromatography on silica gel (hexane/AcOEt = 4/1) to afford the title compound as a white solid.

### Preparation of β-fluorinated disulfides 4

A 25 mL reaction vessel with a magnetic stirring bar was equipped with disulfides (0.5 mmol), alkynes (0.6 mmol), LiCl (2 mmol), Selectfluor (1 mmol), MeCN: H<sub>2</sub>O = 3:1 (3 mL). The mixture was stirred under at r.t. in a nitrogen atmosphere for 2 h.

After the reaction, the solvent was removed under reduced pressure. Purification of the crude product was achieved by flash column chromatography using petrol n-hexane /ethyl acetate (9:1~15:1) as eluent.

#### References:

[1] Yasu, Y., Koike, T., & Akita, M. (2013). Intermolecular aminotrifluoromethylation of alkenes by visible-light-driven photoredox catalysis. *Organic letters*, 15(9), 2136-2139.

### 3. Optimization of reaction conditions

**Table S1.** Optimization of reaction conditions for preparation of  $\beta$ -fluorinated disulfides <sup>a</sup>

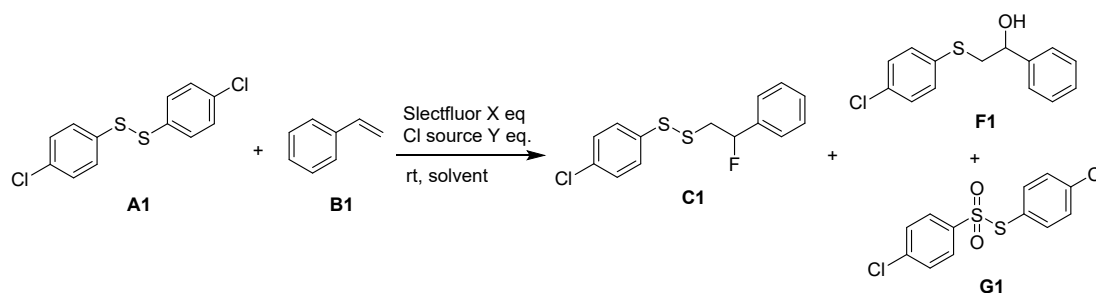

| Entry | solvent                     | Cl source | X<br>(equiv) | Y<br>(equiv) | Yield (%) <sup>b</sup> |       |       |
|-------|-----------------------------|-----------|--------------|--------------|------------------------|-------|-------|
|       |                             |           |              |              | C1                     | F1    | G1    |
| 1     | MeCN                        | NaCl      | 2            | 4            | trace                  | trace | trace |
| 2     | DMF                         | NaCl      | 2            | 4            | trace                  | trace | trace |
| 3     | THF                         | NaCl      | 2            | 4            | trace                  | trace | trace |
| 4     | MeOH                        | NaCl      | 2            | 4            | trace                  | trace | trace |
| 5     | MeCN/H <sub>2</sub> O (3:1) | NaCl      | 2            | 4            | 32                     | 21    | 28    |
| 6     | THF/H <sub>2</sub> O (3:1)  | NaCl      | 2            | 4            | 24                     | 20    | 33    |
| 7     | DMF/H <sub>2</sub> O (3:1)  | NaCl      | 2            | 4            | 18                     | 14    | 28    |
| 8     | MeOH/H <sub>2</sub> O (3:1) | NaCl      | 2            | 4            | 25                     | 27    | 24    |
| 9     | H <sub>2</sub> O            | NaCl      | 2            | 4            | trace                  | trace | trace |
| 10    | MeCN/H <sub>2</sub> O (3:1) | NaBr      | 2            | 4            | trace                  | trace | 14    |

|                 |                                  |                    |          |          |           |              |              |
|-----------------|----------------------------------|--------------------|----------|----------|-----------|--------------|--------------|
| 11              | MeCN/H <sub>2</sub> O (3:1)      | NaI                | 2        | 4        | trace     | 62           | 17           |
| 12              | MeCN/H <sub>2</sub> O (3:1)      | HCl (aq)           | 2        | 4        | 22        | 15           | 21           |
| 13              | <b>MeCN/H<sub>2</sub>O (3:1)</b> | <b>LiCl</b>        | <b>2</b> | <b>4</b> | <b>73</b> | <b>trace</b> | <b>trace</b> |
| 14              | MeCN/H <sub>2</sub> O (3:1)      | KCl                | 2        | 4        | 36        | 19           | 25           |
| 15              | MeCN/H <sub>2</sub> O (3:1)      | ZnCl <sub>2</sub>  | 2        | 4        | 45        | 22           | 14           |
| 16              | MeCN/H <sub>2</sub> O (3:1)      | CuCl <sub>2</sub>  | 2        | 4        | 34        | 26           | 28           |
| 17              | MeCN/H <sub>2</sub> O (3:1)      | MgCl <sub>2</sub>  | 2        | 4        | 38        | 13           | 22           |
| 18              | MeCN/H <sub>2</sub> O (3:1)      | CuCl <sub>2</sub>  | 2        | 4        | 36        | 16           | 18           |
| 19              | MeCN/H <sub>2</sub> O (3:1)      | NaF                | 2        | 4        | NR        | NR           | NR           |
| 20              | MeCN/H <sub>2</sub> O (3:1)      | TBAC               | 2        | 4        | trace     | trace        | trace        |
| 21              | MeCN/H <sub>2</sub> O (3:1)      | NH <sub>4</sub> Cl | 2        | 4        | 21        | 16           | 23           |
| 22              | MeCN/H <sub>2</sub> O (5:1)      | LiCl               | 2        | 4        | 52        | trace        | trace        |
| 23              | MeCN/H <sub>2</sub> O (10:1)     | LiCl               | 2        | 4        | trace     | trace        | trace        |
| 24              | MeCN/H <sub>2</sub> O (2:1)      | LiCl               | 2        | 4        | 68        | trace        | trace        |
| 25              | MeCN/H <sub>2</sub> O (1:1)      | LiCl               | 2        | 4        | 46        | trace        | trace        |
| 26 <sup>c</sup> | MeCN/H <sub>2</sub> O (3:1)      | LiCl               | 1        | 4        | trace     | trace        | trace        |
| 27              | MeCN/H <sub>2</sub> O (3:1)      | LiCl               | 2        | 2        | trace     | 12           | 22           |
| 28              | MeCN/H <sub>2</sub> O (3:1)      | LiCl               | 3        | 6        | 70        | trace        | trace        |
| 29 <sup>c</sup> | MeCN/H <sub>2</sub> O (3:1)      | LiCl               | 2        | 4        | 73        | trace        | trace        |

<sup>a</sup> Reaction conditions: **A1** (0.5 mmol), **B1** (1.2 equiv), selectfluor (2 equiv), catalyst (4 equiv), and solvent (3 mL), under N<sub>2</sub> atmosphere at r.t. for 6 h. <sup>b</sup> Isolated yields. <sup>c</sup> Reaction temperature 60°C.

## 4. Additional evidence for the structure of product.

Although the desired products have been identified by  $^1\text{H-NMR}$ ,  $^{13}\text{C-NMR}$ ,  $^{19}\text{F-NMR}$  and HRMS, further studies were performed to provide additional evidence for the structure. First, the product was treated with  $\text{H}_2\text{O}_2$ , as was expected, oxidative cleavage of S-S bond products sulfonic acid **H1** and **H2** have been detected (Figure S3). Then the product could be selectively oxidized by oxone/KI, and corresponding disulfoxide **I1** and **K1** was obtained (Figure S4). These results confirmed the structure is consistent with our expectation.

### 4.1 General procedure for Oxidative Cleavage of $\beta$ -fluorodisulfides

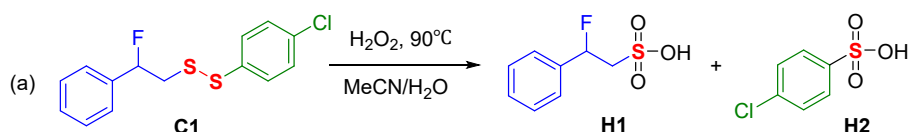

$\text{H}_2\text{O}_2$  (2.0 mmol) was added in aqueous acetonitrile (3mL, 50:50, v/v), followed by substrate (0.5 mmol) was added. Resulting mixture was stirred for 2h at  $90^\circ\text{C}$ . After complete consumption of the starting material as observed by TLC. Then the mixture was characterized by HRMS.

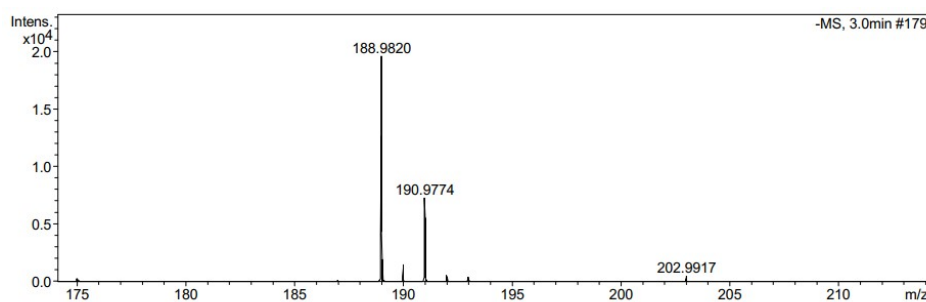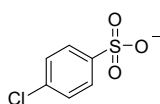

HRMS calcd for  $\text{C}_6\text{H}_4\text{ClSO}_3$   $\{[\text{M}]^-\}$ : 190.9575, found: 190.9774.

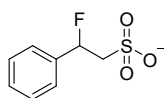

HRMS calcd for  $\text{C}_8\text{H}_8\text{FSO}_3$   $\{[\text{M}]^-\}$ : 203.0184, found: 202.9917.

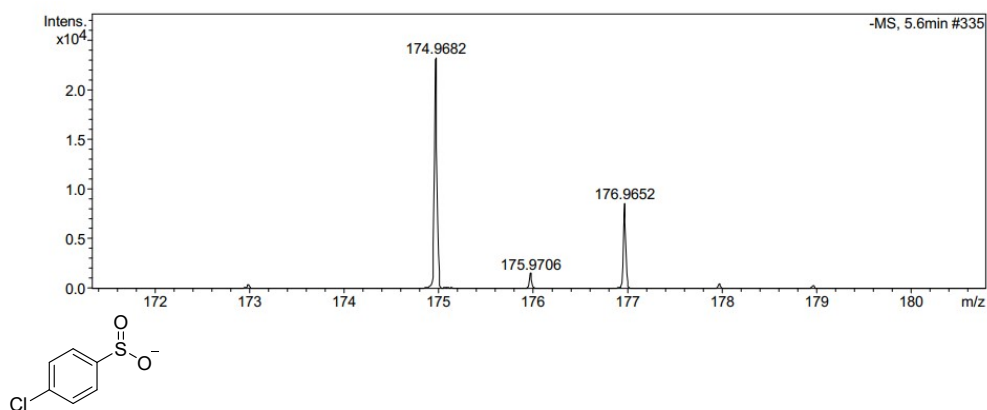

HRMS calcd for  $C_8H_8FSO_2$   $\{[M]^{-}\}$ : 174.9626, found:174.9682.

**Figure S3. LC-MS spectrums result of oxidative cleavage of  $\beta$ -fluorodisulfides**

#### 4.2 General procedure for the selectively oxidation of $\beta$ -fluorodisulfides

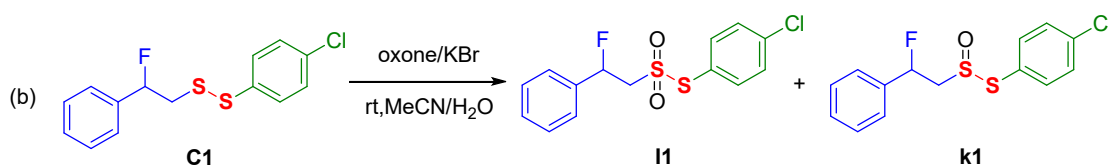

oxone (1.0 mmol) was added to a well-stirred solution of KBr 0.25 mmol in aqueous acetonitrile (50:50, v/v), followed by substrate (0.5 mmol) was added. Resulting mixture was stirred for 1h at room temperature. After complete consumption of the starting material as observed by TLC, water (25 mL) was added and the mixture was extracted with ethyl acetate. The extract was washed with brine, dried over anhydrous sodium sulfate and evaporated to afford the corresponding thiosulfonate as the sole product. Then the mixture was characterized by HRMS.

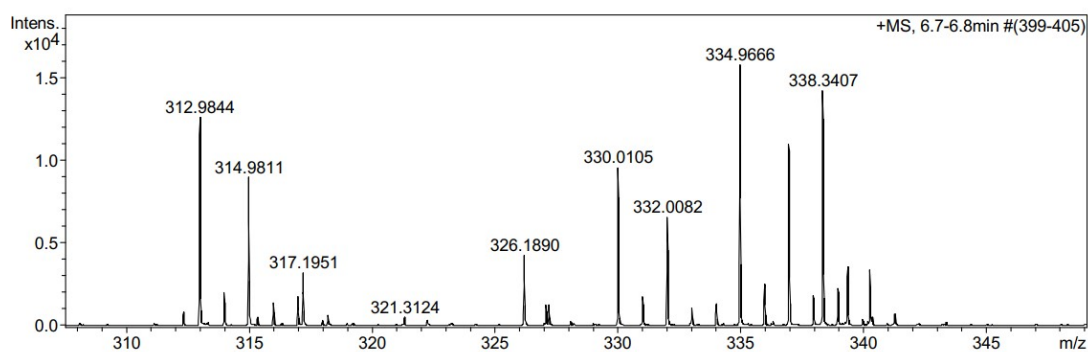

HRMS calcd for  $C_{14}H_{13}ClFO_2S_2$   $\{[M+1]^+\}$ : 331.0030, found:331.0068.

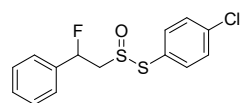

HRMS calcd for  $C_{14}H_{13}ClFO_1S_2$   $\{[M+1]^+\}$ : 315.0080, found:314.9811.

**Figure S4. LC-MS spectrums result of the selectively oxidation of  $\beta$ -**

## fluorodisulfides

### 5. MS study of the module reaction

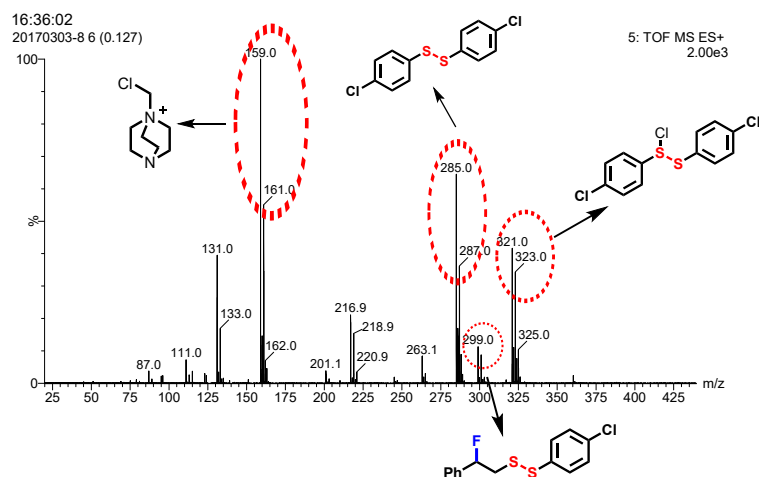

### 6. Density functional theory (DFT) calculations.

#### 6.1 Complete Reference for Gaussian 09

Gaussian 09, Revision D.01, Frisch, M. J.; Trucks, G. W.; Schlegel, H. B.; Scuseria, G. E.; Robb, M. A.; Cheeseman, J. R.; Scalmani, G.; Barone, V.; Mennucci, B.; Petersson, G. A.; Nakatsuji, H.; Caricato, M.; Li, X.; Hratchian, H. P.; Izmaylov, A. F.; Bloino, J.; Zheng, G.; Sonnenberg, J. L.; Hada, M.; Ehara, M.; Toyota, K.; Fukuda, R.; Hasegawa, J.; Ishida, M.; Nakajima, T.; Honda, Y.; Kitao, O.; Nakai, H.; Vreven, T.; Montgomery, Jr., J. A.; Peralta, J. E.; Ogliaro, F.; Bearpark, M.; Heyd, J. J.; Brothers, E.; Kudin, K. N.; Staroverov, V. N.; Kobayashi, R.; Normand, J.; Raghavachari, K.; Rendell, A.; Burant, J. C.; Iyengar, S. S.; Tomasi, J.; Cossi, M.; Rega, N.; Millam, N. J.; Klene, M.; Knox, J. E.; Cross, J. B.; Bakken, V.; Adamo, C.; Jaramillo, J.; Gomperts, R.; Stratmann, R. E.; Yazyev, O.; Austin, A. J.; Cammi, R.; Pomelli, C.; Ochterski, J. W.; Martin, R. L.; Morokuma, K.; Zakrzewski, V. G.; Voth, G. A.; Salvador, P.; Dannenberg, J. J.; Dapprich, S.; Daniels, A. D.; Farkas, Ö.; Foresman, J. B.; Ortiz, J. V.; Cioslowski, J.; Fox, D. J. Gaussian, Inc., Wallingford CT, 2013.

## 6.2 Computational Methods

All the DFT calculations were carried out with the GAUSSIAN 09 series of programs. Density functional theory B3LYP<sup>1</sup> with a 6-31G(d) basis set was used for geometry optimizations. Harmonic frequency calculations were performed for all stationary points to confirm them as a local minima or transition structures and to derive the thermochemical corrections for the enthalpies and free energies. Intrinsic Reaction Coordinate (IRC) calculations were performed to ensure that the saddle points found were true transition states connecting the reactants and the products. M11<sup>2</sup> functional with the 6-311+G(d,p) basis set was employed to calculate the solvation single point energies to give more accurate energy information. The solvent effects were considered by single point calculations on the gas-phase stationary points with a SMD continuum solvation model<sup>3</sup>.

## 6.3 Calculated results of competing pathway

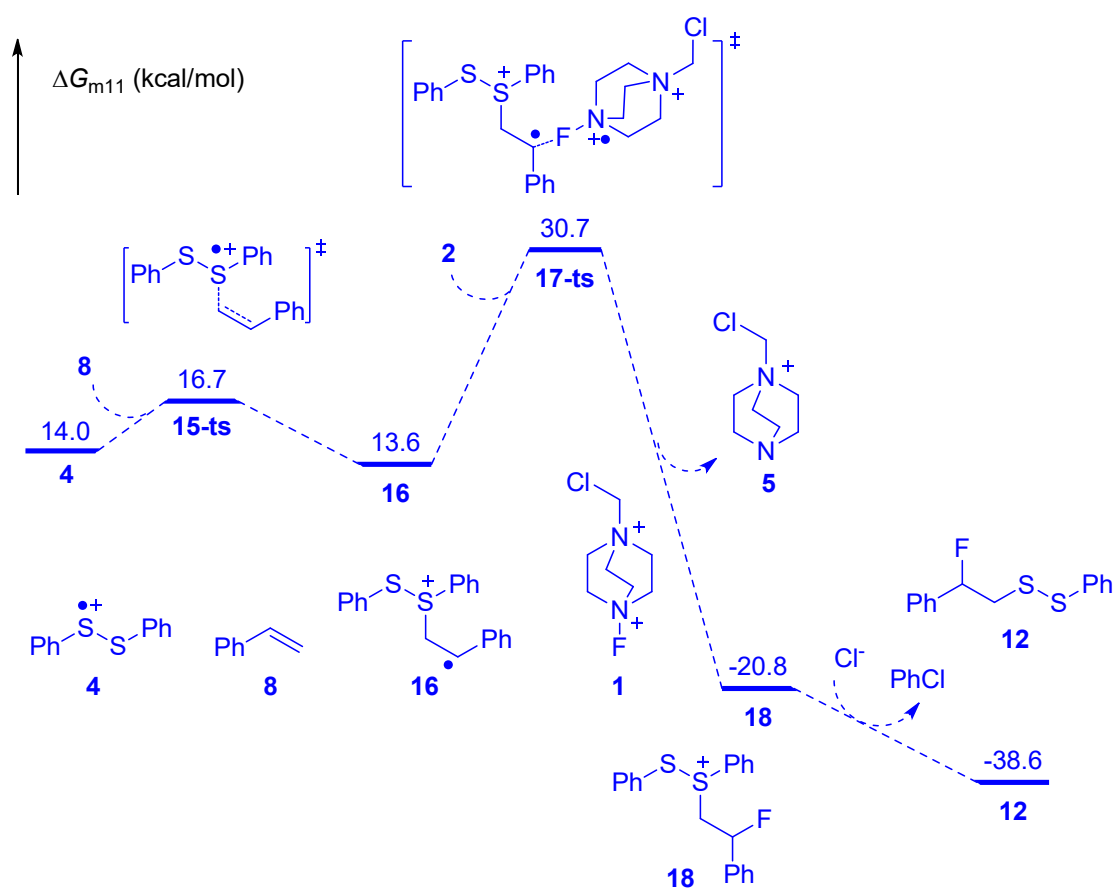

**Figure S7.** Energy profiles for the competing pathway. Calculations were performed at the M11/6-311+G(d,p)/SMD(acetonitrile)/B3LYP/6-31G(d) level of theory.



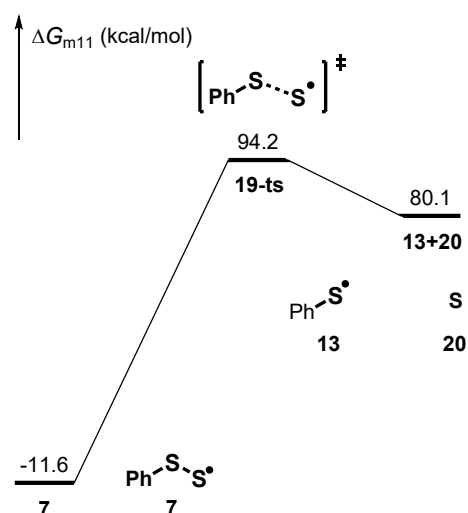

Figure S8 Energy profiles for the S-S bond cleavage process from compound 7.

## 6.4 Absolute Calculation Energies, Enthalpies, and Free Energies

| Geometry | $E_{(\text{elec-B3LYP})}^1$ | $G_{(\text{corr-B3LYP})}^2$ | $H_{(\text{corr-B3LYP})}^3$ | $E_{(\text{solv, M11})}^4$ | IF <sup>5</sup> |
|----------|-----------------------------|-----------------------------|-----------------------------|----------------------------|-----------------|
| 1        | -943.964122                 | 0.187432                    | 0.233099                    | -944.199571                | -               |
| 2        | -944.342892                 | 0.179242                    | 0.231521                    | -944.384662                | -               |
| 3        | -1259.662823                | 0.141701                    | 0.197713                    | -1259.508279               | -               |
| 4        | -1259.387954                | 0.141287                    | 0.197658                    | -1259.274512               | -               |
| 5        | -844.599284                 | 0.183843                    | 0.228251                    | -844.588093                | -               |
| 6        | -1719.823514                | 0.138608                    | 0.200764                    | -1719.676061               | -               |
| 7        | -1028.003816                | 0.059208                    | 0.101023                    | -1027.927096               | -               |
| 8        | -309.641799                 | 0.102289                    | 0.140539                    | -309.523403                | -               |
| 9-ts     | -1337.637157                | 0.179085                    | 0.243046                    | -1337.441334               | -294.05         |
| 10       | -1337.644598                | 0.180173                    | 0.243973                    | -1337.458079               | -               |
| 11-ts    | -2281.712239                | 0.386129                    | 0.478788                    | -2281.66628                | -67.61          |
| 12       | -1437.520114                | 0.186725                    | 0.250642                    | -1437.359125               | -               |
| 13       | -629.802334                 | 0.060415                    | 0.097385                    | -629.719787                | -               |
| 14       | -1090.012695                | 0.059071                    | 0.101014                    | -1089.942012               | -               |
| 15-ts    | -1569.046259                | 0.265766                    | 0.340858                    | -1568.815847               | -109.99         |

|                       |              |           |          |              |        |
|-----------------------|--------------|-----------|----------|--------------|--------|
| <b>16</b>             | -1569.046702 | 0.266525  | 0.341776 | -1568.82152  | -      |
| <b>17-ts</b>          | -2512.942889 | 0.467603  | 0.575757 | -2513.007469 | -35.66 |
| <b>18</b>             | -1668.909204 | 0.272145  | 0.348147 | -1668.722328 | -      |
| <b>19-ts</b>          | -1027.905534 | 0.057213  | 0.098333 | -1027.756514 | -34.4  |
| <b>20</b>             | -398.039559  | -0.014896 | 0.00236  | -398.047472  | -      |
| <b>Cl<sup>-</sup></b> | -460.248732  | -0.01502  | 0.00236  | -460.378934  | -      |
| <b>PhCl</b>           | -691.836755  | 0.061475  | 0.097693 | -691.761631  | -      |
| <b>Cl<sub>2</sub></b> | -920.342921  | -0.02068  | 0.00469  | -920.357068  | -      |
| <b>F<sup>-</sup></b>  | -99.752968   | -0.01416  | 0.00236  | -100.00983   | -      |

<sup>1</sup>The electronic energy calculated by B3LYP in gas phase. <sup>2</sup>The thermal correction to Gibbs free energy calculated by B3LYP in gas phase. <sup>3</sup>The thermal correction to enthalpy calculated by B3LYP in gas phase. <sup>4</sup>The electronic energy calculated by M11 in acetonitrile solvent. <sup>5</sup>The B3LYP calculated imaginary frequencies for the transition states.

## 6.5 B3LYP Geometries for All the Optimized Compounds and

### Transition

### State

|          |             |             |             |          |             |             |             |
|----------|-------------|-------------|-------------|----------|-------------|-------------|-------------|
| <b>1</b> |             |             |             | C        | -2.06131600 | 0.84659400  | 0.00159500  |
| C        | 1.27155200  | -0.67911800 | -1.30065600 | H        | -2.21060400 | 1.44628900  | 0.90115900  |
| C        | -0.26326000 | -0.48806400 | -1.19236200 | H        | -2.21162700 | 1.45011300  | -0.89523700 |
| C        | 0.28717300  | 1.66637000  | -0.10072400 | Cl       | -3.16330000 | -0.52279600 | 0.00045100  |
| C        | 1.77248400  | 1.28583000  | 0.13071400  | <b>2</b> |             |             |             |
| H        | -0.66086100 | -0.01428100 | -2.09243500 | C        | 1.24694000  | -0.66825400 | -1.24723200 |
| H        | -0.78669000 | -1.43165500 | -1.03682900 | C        | -0.29797200 | -0.50088300 | -1.19476900 |
| H        | 1.55008600  | -1.72749300 | -1.42727800 | C        | 0.18282400  | 1.67263200  | -0.09466800 |
| H        | 1.72950100  | -0.08695600 | -2.09550700 | C        | 1.68306200  | 1.30661100  | 0.08003700  |
| H        | 0.12553200  | 2.09838000  | -1.09073800 | H        | -0.69787000 | 0.00029600  | -2.08979800 |
| H        | -0.04927900 | 2.38104000  | 0.65366000  | H        | -0.81279700 | -1.45916000 | -1.03918700 |
| H        | 2.43367000  | 1.72101100  | -0.62172400 | H        | 1.51877100  | -1.73957400 | -1.33981200 |
| H        | 2.13867300  | 1.54699800  | 1.12556200  | H        | 1.68667800  | -0.09575500 | -2.08920100 |
| N        | -0.57776100 | 0.41318900  | -0.00030700 | H        | -0.03682000 | 2.10295800  | -1.08385800 |
| N        | 1.86719200  | -0.21170300 | 0.00088900  | H        | -0.17746600 | 2.34551900  | 0.69872900  |
| C        | -0.22010900 | -0.32114000 | 1.28854300  | H        | 2.28997800  | 1.76134000  | -0.72962300 |
| H        | -0.30443300 | 0.39958300  | 2.10495800  | H        | 2.06596500  | 1.63594700  | 1.06731600  |
| H        | -0.95217600 | -1.11551700 | 1.44256200  | N        | -0.64261900 | 0.38321200  | 0.00082600  |
| C        | 1.21114000  | -0.90017600 | 1.16927200  | N        | 1.79419800  | -0.14601300 | 0.00139900  |
| H        | 1.81717300  | -0.69235500 | 2.05379500  | C        | -0.26270600 | -0.33637400 | 1.29109300  |
| H        | 1.23142000  | -1.97208400 | 0.96279600  | H        | -0.41685400 | 0.39161400  | 2.10255500  |
| F        | 3.21263400  | -0.55419100 | 0.00280200  | H        | -0.94895000 | -1.18603600 | 1.41405800  |

|          |             |             |             |          |             |             |             |
|----------|-------------|-------------|-------------|----------|-------------|-------------|-------------|
| C        | 1.21582200  | -0.80126000 | 1.17089500  | H        | 3.69997400  | 2.80083700  | -0.64379700 |
| H        | 1.79053200  | -0.50597600 | 2.07272800  | S        | 0.96302400  | -1.99635300 | 0.40304400  |
| H        | 1.28329300  | -1.89882300 | 1.02697400  | S        | -0.96313800 | -1.99639000 | -0.40274100 |
| F        | 3.76239100  | -0.57419100 | -0.00244500 | C        | -1.70658900 | -0.43412300 | -0.05183300 |
| C        | -2.08274000 | 0.81145600  | -0.00615200 | C        | -1.59884000 | 0.18781200  | 1.20856200  |
| H        | -2.25998400 | 1.40864300  | 0.90110200  | C        | -2.52581100 | 0.10643300  | -1.06408900 |
| H        | -2.25468100 | 1.39286200  | -0.92460100 | C        | -2.31639200 | 1.35247200  | 1.44576700  |
| Cl       | -3.23904300 | -0.56177100 | 0.00140100  | H        | -0.98802300 | -0.25076800 | 1.99066500  |
| <b>3</b> |             |             |             | C        | -3.24448300 | 1.26850300  | -0.80292300 |
| C        | -3.92249700 | -0.31759500 | -0.70344300 | H        | -2.59583700 | -0.37853100 | -2.03300700 |
| C        | -2.97910600 | 0.67407600  | -0.42958700 | C        | -3.13747800 | 1.89384900  | 0.44514200  |
| C        | -1.88217900 | 0.38256400  | 0.39567100  | H        | -2.25490200 | 1.83274200  | 2.41724600  |
| C        | -1.73729800 | -0.89865400 | 0.94897200  | H        | -3.88245900 | 1.69042800  | -1.57284700 |
| C        | -2.68813300 | -1.88443500 | 0.67317900  | H        | -3.69982800 | 2.80108000  | 0.64345200  |
| C        | -3.77827300 | -1.59574000 | -0.15291900 | <b>5</b> |             |             |             |
| H        | -4.77396200 | -0.09090700 | -1.34420000 | C        | 1.53522600  | -0.94768400 | -1.19722200 |
| H        | -3.08945000 | 1.67149700  | -0.85230600 | C        | 0.04854600  | -0.47475800 | -1.24570300 |
| H        | -0.88730300 | -1.11786500 | 1.59286600  | C        | 0.72833600  | 1.55751800  | -0.00002300 |
| H        | -2.57578700 | -2.87862000 | 1.10429600  | C        | 2.19333000  | 1.01602100  | 0.00011400  |
| H        | -4.51832700 | -2.36627400 | -0.36648800 | H        | -0.16942900 | 0.16500500  | -2.10484200 |
| S        | -0.69361600 | 1.66391900  | 0.80432200  | H        | -0.66378300 | -1.30021700 | -1.23690900 |
| S        | 0.69369600  | 1.66400400  | -0.80411200 | H        | 1.58209900  | -2.03958700 | -1.19612000 |
| C        | 1.88221200  | 0.38254600  | -0.39563800 | H        | 2.07157600  | -0.59300800 | -2.08118600 |
| C        | 2.97945700  | 0.67404700  | 0.42921600  | H        | 0.49443200  | 2.14905600  | -0.88852500 |
| C        | 1.73696000  | -0.89877700 | -0.94864600 | H        | 0.49432100  | 2.14917500  | 0.88837200  |
| C        | 3.92279200  | -0.31772100 | 0.70293900  | H        | 2.72614900  | 1.37828500  | -0.88276700 |
| H        | 3.09007700  | 1.67153600  | 0.85170500  | H        | 2.72594500  | 1.37814700  | 0.88317900  |
| C        | 2.68771800  | -1.88464700 | -0.67293900 | N        | -0.22829400 | 0.36448500  | -0.00000700 |
| H        | 0.88672500  | -1.11796300 | -1.59223300 | N        | 2.20796100  | -0.44433700 | 0.00000300  |
| C        | 3.77817700  | -1.59594500 | 0.15273300  | C        | 0.04854200  | -0.47472500 | 1.24570000  |
| H        | 4.77450400  | -0.09103100 | 1.34336500  | H        | -0.16926400 | 0.16511500  | 2.10483000  |
| H        | 2.57507300  | -2.87890200 | -1.10381200 | H        | -0.66389100 | -1.30009500 | 1.23702400  |
| H        | 4.51818000  | -2.36654900 | 0.36621600  | C        | 1.53515100  | -0.94784600 | 1.19713200  |
| <b>4</b> |             |             |             | H        | 2.07154600  | -0.59342100 | 2.08116800  |
| C        | 2.31685200  | 1.35193400  | -1.44612100 | H        | 1.58189900  | -2.03975600 | 1.19580200  |
| C        | 1.59924000  | 0.18733600  | -1.20878700 | C        | -1.63751700 | 0.91279200  | -0.00000900 |
| C        | 1.70656900  | -0.43418500 | 0.05185200  | H        | -1.75333200 | 1.52251600  | 0.89626400  |
| C        | 2.52543600  | 0.10671800  | 1.06421800  | H        | -1.75333900 | 1.52251400  | -0.89628000 |
| C        | 3.24416900  | 1.26872100  | 0.80292000  | Cl       | -2.89072200 | -0.34427500 | 0.00000500  |
| C        | 3.13757800  | 1.89365600  | -0.44538600 | <b>6</b> |             |             |             |
| H        | 2.25569000  | 1.83188400  | -2.41777800 | C        | 3.52945200  | 1.35019400  | -0.47519300 |
| H        | 0.98870800  | -0.25151800 | -1.99095700 | C        | 2.75935200  | 0.28330300  | -0.93494800 |
| H        | 2.59513400  | -0.37793300 | 2.03331900  | C        | 1.74278200  | -0.23425900 | -0.11838800 |
| H        | 3.88186900  | 1.69091000  | 1.57292800  | C        | 1.49735200  | 0.30380400  | 1.15029800  |

|          |             |             |             |             |             |             |             |
|----------|-------------|-------------|-------------|-------------|-------------|-------------|-------------|
| C        | 2.27929700  | 1.37006700  | 1.59885300  | H           | 3.33579100  | 0.45078000  | 0.00125400  |
| C        | 3.28998500  | 1.89343100  | 0.79065700  | H           | 2.47255800  | -1.88506000 | 0.00151500  |
| H        | 4.31985300  | 1.75254900  | -1.10255400 | H           | 0.03502400  | -2.30411700 | 0.00014500  |
| H        | 2.94224300  | -0.14608400 | -1.91524800 | C           | -1.95513700 | -0.52969400 | -0.00130600 |
| H        | 0.72103100  | -0.12524100 | 1.77406200  | C           | -2.97773300 | 0.33518300  | 0.00177600  |
| H        | 2.09653900  | 1.78891800  | 2.58433900  | H           | -2.18641400 | -1.59505800 | -0.00431900 |
| H        | 3.89573700  | 2.72196400  | 1.14728800  | H           | -4.00487900 | -0.01657300 | 0.00097200  |
| S        | 0.79690200  | -1.63450800 | -0.71665700 | H           | -2.84000900 | 1.41309400  | 0.00530200  |
| S        | -0.74401600 | -0.78439000 | -1.91018100 |             |             |             |             |
| C        | -1.65859200 | 0.28184600  | -0.80526400 | <b>9-ts</b> |             |             |             |
| C        | -2.62495100 | -0.25564200 | 0.05813900  | C           | 4.18868500  | 1.77438400  | -0.57365200 |
| C        | -1.44838400 | 1.66713500  | -0.86326300 | C           | 3.11117800  | 0.89357700  | -0.67881200 |
| C        | -3.37927100 | 0.60061600  | 0.85903800  | C           | 3.19888900  | -0.37569900 | -0.10075500 |
| H        | -2.76661100 | -1.32946700 | 0.10807000  | C           | 4.36440800  | -0.76133400 | 0.57663900  |
| C        | -2.21708500 | 2.51515900  | -0.06511400 | C           | 5.43842400  | 0.12366600  | 0.66817800  |
| H        | -0.69504500 | 2.07025600  | -1.53246500 | C           | 5.35432200  | 1.39518400  | 0.09591400  |
| C        | -3.18001400 | 1.98276900  | 0.79495000  | H           | 4.11633000  | 2.76126900  | -1.02351800 |
| H        | -4.12495400 | 0.18716600  | 1.53195500  | H           | 2.20576700  | 1.18515800  | -1.20210200 |
| H        | -2.06054000 | 3.58917800  | -0.11301600 | H           | 4.42920300  | -1.74630800 | 1.03227800  |
| H        | -3.77600100 | 2.64502300  | 1.41703200  | H           | 6.33909800  | -0.18016200 | 1.19503000  |
| Cl       | -0.29046900 | -2.64720200 | 1.54066800  | H           | 6.19005100  | 2.08508100  | 0.17244100  |
| <b>7</b> |             |             |             | S           | 1.89689400  | -1.61807200 | -0.19902000 |
| C        | -1.90594600 | 1.45124300  | 0.00016900  | S           | 0.19038400  | -0.69442100 | -0.81363900 |
| C        | -0.56362500 | 1.07449200  | 0.00030500  | C           | -3.26280700 | 0.51346800  | 0.40444800  |
| C        | -0.23519900 | -0.28399200 | 0.00008500  | C           | -4.19048300 | 1.53524200  | 0.09396200  |
| C        | -1.24054900 | -1.26270500 | -0.00020800 | C           | -3.70787500 | -0.82801800 | 0.32847300  |
| C        | -2.57877700 | -0.87301800 | -0.00027700 | C           | -5.50053100 | 1.23520100  | -0.26191000 |
| C        | -2.91465600 | 0.48333300  | -0.00013500 | H           | -3.86544600 | 2.57197300  | 0.14053100  |
| H        | -2.16494800 | 2.50646900  | 0.00042100  | C           | -5.01691600 | -1.12372000 | -0.03205000 |
| H        | 0.22633600  | 1.81928700  | 0.00057900  | H           | -3.01609200 | -1.63808400 | 0.53766400  |
| H        | -0.97763500 | -2.31762300 | -0.00031900 | C           | -5.92184700 | -0.09673600 | -0.32627100 |
| H        | -3.35842900 | -1.62954100 | -0.00046000 | H           | -6.19514800 | 2.03828500  | -0.49296600 |
| H        | -3.95816800 | 0.78512900  | -0.00022400 | H           | -5.33651800 | -2.16074900 | -0.08939300 |
| S        | 1.44922000  | -0.90718200 | 0.00039400  | H           | -6.94410700 | -0.33391900 | -0.60737200 |
| S        | 2.72986500  | 0.61344200  | -0.00037100 | C           | -1.91599300 | 0.87750400  | 0.78098900  |
| <b>8</b> |             |             |             | C           | -0.89495800 | 0.01180500  | 1.15568800  |
| C        | -0.51530900 | -0.22055300 | -0.00079800 | H           | -1.67028700 | 1.93477000  | 0.69574800  |
| C        | -0.00910700 | 1.09267500  | -0.00114100 | H           | 0.00707600  | 0.43508200  | 1.58493300  |
| C        | 1.36231100  | 1.32994200  | -0.00035900 | H           | -1.12337000 | -0.99964000 | 1.47422500  |
| C        | 2.26571900  | 0.26200000  | 0.00067800  | <b>10</b>   |             |             |             |
| C        | 1.78129900  | -1.04637200 | 0.00081600  | C           | 4.68142000  | -1.50000700 | -0.48670000 |
| C        | 0.40657600  | -1.28171800 | 0.00001500  | C           | 3.45704800  | -1.40828200 | 0.17947400  |
| H        | -0.69422400 | 1.93550100  | -0.00227600 | C           | 2.89665700  | -0.15164400 | 0.44120400  |
| H        | 1.73044300  | 2.35265500  | -0.00067800 | C           | 3.55843200  | 1.00932900  | 0.02313600  |
|          |             |             |             | C           | 4.76884200  | 0.90759400  | -0.66147100 |

|              |             |             |             |           |             |             |             |
|--------------|-------------|-------------|-------------|-----------|-------------|-------------|-------------|
| C            | 5.33721200  | -0.34467000 | -0.91322200 | C         | 4.84417300  | -1.33225300 | 0.25067500  |
| H            | 5.11197000  | -2.47793800 | -0.68514200 | C         | 3.39750900  | -1.89002900 | 0.42796700  |
| H            | 2.93548700  | -2.30850400 | 0.49252100  | H         | 4.34817900  | -0.38827600 | -2.17240500 |
| H            | 3.12083100  | 1.98212600  | 0.22470000  | H         | 3.90875100  | 1.27776300  | -1.74727000 |
| H            | 5.27605200  | 1.81130200  | -0.98903200 | H         | 1.72356000  | 0.59393800  | -1.07500600 |
| H            | 6.28401500  | -0.41764400 | -1.44109100 | H         | 2.09094900  | -1.00795100 | -1.73105000 |
| S            | 1.37449700  | -0.11311400 | 1.40643700  | H         | 5.39807400  | -1.85784600 | -0.53017900 |
| S            | 0.19798600  | 1.35510400  | 0.51714600  | H         | 5.42102200  | -1.36801400 | 1.17740100  |
| C            | -2.95526100 | -0.36906900 | -0.39782000 | H         | 3.15554500  | -2.63053800 | -0.33603300 |
| C            | -3.58995800 | 0.90129200  | -0.50197300 | H         | 3.27245000  | -2.35278400 | 1.40835000  |
| C            | -3.77863500 | -1.48126000 | -0.05871200 | N         | 4.75314200  | 0.13922300  | -0.16084400 |
| C            | -4.95440400 | 1.03893400  | -0.28719600 | N         | 2.47132100  | -0.77106700 | 0.30648000  |
| H            | -3.00010200 | 1.78043100  | -0.74222700 | C         | 4.09611100  | 0.92295600  | 0.97732300  |
| C            | -5.14100600 | -1.33418700 | 0.15172500  | H         | 4.78489000  | 0.89905100  | 1.82470200  |
| H            | -3.31739200 | -2.46173500 | 0.03226900  | H         | 3.99670900  | 1.95372000  | 0.63741600  |
| C            | -5.74222600 | -0.07286500 | 0.03856800  | C         | 2.72141000  | 0.26308700  | 1.30611400  |
| H            | -5.41288100 | 2.02097500  | -0.36994600 | H         | 2.72731800  | -0.19964800 | 2.29475100  |
| H            | -5.74359000 | -2.20170900 | 0.40793400  | H         | 1.90921900  | 0.99161900  | 1.26766200  |
| H            | -6.80940700 | 0.04248300  | 0.20520900  | F         | 0.66063600  | -1.58430400 | 0.61525300  |
| C            | -1.56733900 | -0.57170900 | -0.62007500 | C         | 6.16906800  | 0.63139600  | -0.43217000 |
| C            | -0.58182400 | 0.46956500  | -0.97067300 | H         | 6.74865900  | 0.46741600  | 0.47695700  |
| H            | -1.17794700 | -1.57237800 | -0.45077500 | H         | 6.56778900  | 0.03499800  | -1.25351200 |
| H            | 0.25328700  | 0.06671000  | -1.54869300 | Cl        | 6.24215300  | 2.34359400  | -0.86798600 |
| H            | -1.01379000 | 1.30593000  | -1.53065200 | S         | -2.00653100 | 2.59178600  | 0.81565300  |
| <b>11-ts</b> |             |             |             | C         | -3.63717900 | 2.42265500  | 0.09156300  |
| S            | -1.03811100 | 0.79916000  | 0.41324200  | C         | -3.81641200 | 2.24916700  | -1.29001700 |
| C            | -2.23457200 | -4.88164100 | -0.37846700 | C         | -4.74372100 | 2.55805000  | 0.94388800  |
| C            | -1.64206200 | -3.99955500 | 0.50615300  | C         | -5.10753000 | 2.19463000  | -1.81004300 |
| C            | -1.98618800 | -2.61320700 | 0.48837800  | H         | -2.95479100 | 2.17425300  | -1.94651200 |
| C            | -2.93185700 | -2.14615700 | -0.47474100 | C         | -6.03269500 | 2.51794500  | 0.40776100  |
| C            | -3.51241600 | -3.03615000 | -1.35843400 | H         | -4.59619500 | 2.70557700  | 2.00957600  |
| C            | -3.16997000 | -4.40002800 | -1.30854100 | C         | -6.21480900 | 2.33205000  | -0.96374100 |
| H            | -1.98679600 | -5.93765800 | -0.35341100 | H         | -5.25308400 | 2.07044600  | -2.87913800 |
| H            | -0.91990600 | -4.35369100 | 1.23607700  | H         | -6.89110500 | 2.63099200  | 1.06286400  |
| H            | -3.19070300 | -1.09351400 | -0.51507400 | H         | -7.21817500 | 2.30461900  | -1.37793100 |
| H            | -4.23698000 | -2.68859300 | -2.08747800 | <b>12</b> |             |             |             |
| H            | -3.63975900 | -5.09283500 | -2.00112400 | F         | -0.67318600 | -0.83642700 | 0.58455600  |
| C            | -1.41172200 | -1.77502600 | 1.46179200  | C         | -2.85552100 | -0.29369100 | -0.18126300 |
| C            | -1.77786800 | -0.36846300 | 1.71990500  | C         | -3.38272700 | -0.68125300 | 1.05572400  |
| H            | -0.75308400 | -2.24718000 | 2.18167500  | C         | -4.75884600 | -0.85701100 | 1.20794200  |
| H            | -2.85860300 | -0.22205200 | 1.63766300  | C         | -5.61923100 | -0.64393800 | 0.12898400  |
| H            | -1.43320900 | -0.03885100 | 2.70000300  | C         | -5.09707700 | -0.25972600 | -1.10819300 |
| C            | 2.43781600  | -0.23018900 | -1.04869400 | C         | -3.72102100 | -0.08860000 | -1.26252300 |
| C            | 3.87957700  | 0.24083600  | -1.41204900 | H         | -2.71057900 | -0.85869000 | 1.88884600  |

|           |             |             |             |              |             |             |             |
|-----------|-------------|-------------|-------------|--------------|-------------|-------------|-------------|
| H         | -5.15876600 | -1.16334600 | 2.17086400  | H            | -0.37231100 | -2.14990900 | 0.34088700  |
| H         | -6.69025400 | -0.78218800 | 0.24924800  | H            | -2.76429500 | -2.15445400 | -0.34877000 |
| H         | -5.75928000 | -0.10133300 | -1.95506300 | H            | -3.95513100 | -0.00286300 | -0.69766800 |
| H         | -3.31789800 | 0.19977600  | -2.23143800 | S            | 1.44999300  | 0.00346200  | 0.95789200  |
| C         | -1.36993800 | -0.04910400 | -0.34352000 | Cl           | 2.56697500  | -0.00265900 | -0.83806100 |
| C         | -1.00969400 | 1.41642600  | -0.09491300 |              |             |             |             |
| H         | -1.03532100 | -0.35270600 | -1.34233700 | <b>15-ts</b> |             |             |             |
| H         | -1.68605000 | 2.05483300  | -0.67505000 | C            | 0.35242300  | 3.84020600  | 0.76100100  |
| H         | -1.15640100 | 1.65581700  | 0.96251600  | C            | 0.04394400  | 2.56651000  | 1.23785900  |
| C         | 3.31069300  | -2.19784000 | -0.32930700 | C            | 0.39855600  | 1.44586400  | 0.47172000  |
| C         | 2.46143400  | -1.17562600 | 0.09376900  | C            | 1.05511100  | 1.58731000  | -0.75978900 |
| C         | 2.97702200  | 0.11117300  | 0.29953900  | C            | 1.35396300  | 2.86823900  | -1.22265200 |
| C         | 4.33990600  | 0.36257600  | 0.09095600  | C            | 1.00500700  | 3.99039700  | -0.46507000 |
| C         | 5.18608100  | -0.67183200 | -0.31375900 | H            | 0.08012600  | 4.71260700  | 1.34684500  |
| C         | 4.67215400  | -1.95129700 | -0.52911900 | H            | -0.46482100 | 2.44169600  | 2.18855600  |
| H         | 2.90927300  | -3.19466300 | -0.49243800 | H            | 1.33436600  | 0.71923000  | -1.34683400 |
| H         | 1.40823900  | -1.36589200 | 0.26054500  | H            | 1.86036500  | 2.98958300  | -2.17536500 |
| H         | 4.72931400  | 1.36452700  | 0.24386300  | H            | 1.24089700  | 4.98429000  | -0.83324800 |
| H         | 6.24269200  | -0.47280100 | -0.47170100 | S            | -0.04949400 | -0.14828600 | 1.13765700  |
| H         | 5.32901600  | -2.75471800 | -0.85167500 | S            | 1.71553800  | -1.12538900 | 1.87148100  |
| S         | 1.97355300  | 1.46650700  | 0.92661700  | C            | 2.86356500  | -1.18672900 | 0.51221600  |
| S         | 0.66115300  | 1.98209800  | -0.63306100 | C            | 2.86734300  | -2.29499900 | -0.35316000 |
| <b>13</b> |             |             |             | C            | 3.82706300  | -0.17307500 | 0.37642200  |
| C         | 1.53821100  | 1.21553700  | -0.00003300 | C            | 3.82651100  | -2.37536100 | -1.36106600 |
| C         | 0.14987600  | 1.22029400  | 0.00022900  | H            | 2.14151400  | -3.09121600 | -0.21869000 |
| C         | -0.57875900 | -0.00005200 | 0.00025500  | C            | 4.78576300  | -0.26900200 | -0.63216400 |
| C         | 0.14995100  | -1.22034000 | 0.00019500  | H            | 3.82909500  | 0.66729000  | 1.06276500  |
| C         | 1.53827100  | -1.21549500 | 0.00000000  | C            | 4.78293300  | -1.36388500 | -1.50049900 |
| C         | 2.23642700  | 0.00004200  | -0.00024700 | H            | 3.83850900  | -3.23267700 | -2.02732000 |
| H         | 2.08440700  | 2.15473200  | -0.00000100 | H            | 5.53868700  | 0.50663200  | -0.73451100 |
| H         | -0.40346300 | 2.15400300  | 0.00052200  | H            | 5.53476100  | -1.43644600 | -2.28079700 |
| H         | -0.40332900 | -2.15408800 | 0.00054200  | C            | -0.86884200 | -1.24222000 | -0.58723500 |
| H         | 2.08450600  | -2.15466800 | -0.00001500 | C            | -1.96573300 | -0.51308800 | -1.11317100 |
| H         | 3.32302700  | 0.00008100  | -0.00059100 | H            | -1.06257000 | -2.15710300 | -0.03183500 |
| S         | -2.30556300 | 0.00000100  | -0.00017800 | H            | 0.03083900  | -1.29172200 | -1.19490100 |
| <b>14</b> |             |             |             | H            | -1.74462300 | 0.21481100  | -1.89012100 |
| C         | -2.24365500 | 1.21143900  | -0.20553000 | C            | -3.32285800 | -0.60006700 | -0.68616900 |
| C         | -0.90434200 | 1.21701700  | 0.18097500  | C            | -4.29544500 | 0.20385600  | -1.34526600 |
| C         | -0.22995200 | 0.00134100  | 0.37824800  | C            | -3.76135800 | -1.46002700 | 0.36029300  |
| C         | -0.90302300 | -1.21586800 | 0.18583300  | C            | -5.63139600 | 0.14680900  | -0.98240600 |
| C         | -2.24225100 | -1.21334100 | -0.20090200 | H            | -3.97588900 | 0.86439700  | -2.14680300 |
| C         | -2.91099700 | -0.00169100 | -0.39677800 | C            | -5.09792100 | -1.50733900 | 0.71968700  |
| H         | -2.76675800 | 2.15140100  | -0.35696300 | H            | -3.04858500 | -2.08686000 | 0.88699500  |
| H         | -0.37465400 | 2.15226700  | 0.33219400  | C            | -6.03908200 | -0.70809800 | 0.05133700  |
|           |             |             |             | H            | -6.36114700 | 0.76339100  | -1.49777800 |

|              |             |             |             |   |             |             |             |
|--------------|-------------|-------------|-------------|---|-------------|-------------|-------------|
| H            | -5.41960300 | -2.16713700 | 1.51951100  | C | 2.00928500  | 0.78423000  | 3.80323900  |
| H            | -7.08591200 | -0.75377000 | 0.33600400  | C | 1.63193400  | 0.39277500  | 2.51782800  |
| <b>16</b>    |             |             |             | C | 2.57115700  | 0.49742800  | 1.47928100  |
| C            | 0.48508900  | 3.86052000  | 0.78146400  | C | 3.87047800  | 0.97172000  | 1.70241500  |
| C            | 0.09305600  | 2.59164700  | 1.20662000  | C | 4.22724800  | 1.35357600  | 2.99532800  |
| C            | 0.41807600  | 1.47893500  | 0.41733200  | C | 3.30277800  | 1.25725600  | 4.04164900  |
| C            | 1.13151700  | 1.61749600  | -0.78190400 | H | 1.29909900  | 0.70792800  | 4.62074100  |
| C            | 1.50968600  | 2.89451500  | -1.19409700 | H | 0.62807900  | 0.03666600  | 2.30902300  |
| C            | 1.18938600  | 4.01108300  | -0.41549400 | H | 4.59684300  | 1.02075300  | 0.89765200  |
| H            | 0.23457900  | 4.72871200  | 1.38285100  | H | 5.23189400  | 1.71714900  | 3.18743600  |
| H            | -0.46134300 | 2.46661600  | 2.13151800  | H | 3.59536900  | 1.54588500  | 5.04652500  |
| H            | 1.39115600  | 0.75486000  | -1.38543800 | S | 2.00989100  | -0.06555100 | -0.13271500 |
| H            | 2.05716000  | 3.01687900  | -2.12355100 | S | 3.81699800  | -0.60731800 | -1.34417300 |
| H            | 1.48872400  | 5.00142400  | -0.74491200 | C | 4.04499500  | -2.32992100 | -1.14364900 |
| S            | -0.12191200 | -0.10457000 | 1.04126000  | C | 4.89344000  | -2.80523600 | -0.11758700 |
| S            | 1.59158200  | -1.17792200 | 1.83275500  | C | 3.51132600  | -3.21635800 | -2.10684900 |
| C            | 2.78061700  | -1.26018300 | 0.51536900  | C | 5.20303100  | -4.15880100 | -0.06414300 |
| C            | 2.77185700  | -2.35308700 | -0.37085700 | H | 5.31476500  | -2.11363600 | 0.60472800  |
| C            | 3.78781000  | -0.28234900 | 0.43073600  | C | 3.83690000  | -4.56560900 | -2.04235100 |
| C            | 3.76191000  | -2.45417800 | -1.34591100 | H | 2.88064300  | -2.83611200 | -2.90405200 |
| H            | 2.01133100  | -3.12207400 | -0.27632800 | C | 4.67795200  | -5.03507700 | -1.02385500 |
| C            | 4.77603900  | -0.39887700 | -0.54589400 | H | 5.86450900  | -4.53318900 | 0.71058500  |
| H            | 3.79924900  | 0.54494500  | 1.13272600  | H | 3.45204100  | -5.25271500 | -2.78922800 |
| C            | 4.76075900  | -1.47833800 | -1.43385900 | H | 4.93590700  | -6.08926800 | -0.98486800 |
| H            | 3.76408000  | -3.29960800 | -2.02718100 | C | 1.68795900  | 1.51835400  | -1.04467700 |
| H            | 5.56206100  | 0.34756700  | -0.60823400 | C | 0.80728100  | 2.47797900  | -0.32003700 |
| H            | 5.53586400  | -1.56693500 | -2.18932300 | H | 1.29432400  | 1.23040400  | -2.02373100 |
| C            | -0.81253700 | -1.05193900 | -0.54972600 | H | 2.66523400  | 1.99719300  | -1.20635300 |
| C            | -1.96218900 | -0.33379700 | -1.07728300 | C | 0.28514700  | 3.64023600  | -0.87881400 |
| H            | -1.01626400 | -2.03196500 | -0.11490600 | C | -0.32895600 | 4.59171500  | 0.00873700  |
| H            | 0.04209800  | -1.10596900 | -1.22425200 | C | 0.42631400  | 3.98178800  | -2.26827800 |
| H            | -1.75924200 | 0.43050900  | -1.82225200 | C | -0.74542000 | 5.82080000  | -0.46075500 |
| C            | -3.30977300 | -0.50573700 | -0.66601100 | H | -0.43384000 | 4.33941200  | 1.06017000  |
| C            | -4.32124800 | 0.27920900  | -1.29348100 | C | 0.00266800  | 5.21102700  | -2.72415100 |
| C            | -3.71556700 | -1.43404700 | 0.33638600  | H | 0.87918500  | 3.28054800  | -2.96188700 |
| C            | -5.65404300 | 0.13895100  | -0.94380400 | C | -0.57637600 | 6.13149000  | -1.82299600 |
| H            | -4.03135200 | 0.99202400  | -2.06090000 | H | -1.18729200 | 6.54949400  | 0.21095000  |
| C            | -5.05101200 | -1.56411900 | 0.68118300  | H | 0.11868000  | 5.48085900  | -3.76880500 |
| H            | -2.97822300 | -2.05088600 | 0.84148200  | H | -0.89608900 | 7.10296800  | -2.19119900 |
| C            | -6.02767900 | -0.78244500 | 0.04513400  | H | 0.70881400  | 2.34826300  | 0.75314200  |
| H            | -6.40954500 | 0.74349100  | -1.43620900 | F | -0.89052100 | 0.76811700  | 0.21203200  |
| H            | -5.34304200 | -2.27677900 | 1.44652400  | C | -3.18048100 | -0.26142700 | -1.09362800 |
| H            | -7.07254400 | -0.89250600 | 0.31872400  | C | -4.63765600 | -0.81845000 | -1.05087200 |
| <b>17-ts</b> |             |             |             | C | -4.94213700 | 0.03214400  | 1.26022000  |

|           |             |             |             |              |             |             |             |
|-----------|-------------|-------------|-------------|--------------|-------------|-------------|-------------|
| C         | -3.56473000 | 0.74578600  | 1.07705800  | H            | -5.53876800 | 0.61293300  | 0.24894800  |
| H         | -5.37855600 | -0.07148700 | -1.34468800 | H            | -5.79418700 | -1.48584000 | 1.55029800  |
| H         | -4.76366300 | -1.70182400 | -1.67755100 | C            | 0.51602600  | -1.16178600 | 0.45813800  |
| H         | -2.51002600 | -0.93380200 | -1.63135800 | C            | 1.69155100  | -0.73596400 | 1.36537300  |
| H         | -3.14922000 | 0.71790100  | -1.57387200 | H            | 0.74911900  | -2.11482600 | -0.02543200 |
| H         | -5.77658200 | 0.66610700  | 0.95287800  | H            | -0.41087200 | -1.26809700 | 1.02764600  |
| H         | -5.10787400 | -0.29166300 | 2.28991000  | C            | 3.00967300  | -0.62536200 | 0.64298200  |
| H         | -3.67386800 | 1.69614700  | 0.55226900  | C            | 3.57012600  | 0.63143200  | 0.38569400  |
| H         | -3.08847900 | 0.93307400  | 2.04076600  | C            | 3.67435300  | -1.78279900 | 0.21420400  |
| N         | -4.96405500 | -1.22140700 | 0.38613800  | C            | 4.77371800  | 0.73309600  | -0.31596600 |
| N         | -2.70856000 | -0.13294700 | 0.28361900  | H            | 3.07693600  | 1.53148000  | 0.74665100  |
| C         | -3.89172400 | -2.18416600 | 0.89455900  | C            | 4.88000200  | -1.67905200 | -0.47674300 |
| H         | -4.19892000 | -2.51964500 | 1.88747700  | H            | 3.26400300  | -2.76139700 | 0.44831700  |
| H         | -3.88689000 | -3.04329900 | 0.22378200  | C            | 5.42756300  | -0.42116700 | -0.74848800 |
| C         | -2.52176900 | -1.43549300 | 0.92112800  | H            | 5.20679200  | 1.71031000  | -0.50797400 |
| H         | -2.17178500 | -1.27956900 | 1.94292200  | H            | 5.39781100  | -2.57837000 | -0.79664200 |
| H         | -1.75983500 | -1.99270100 | 0.37399200  | H            | 6.36832100  | -0.34368300 | -1.28539400 |
| C         | -6.36167600 | -1.83998400 | 0.48342500  | H            | 1.45061200  | 0.20122600  | 1.87858500  |
| H         | -6.55335300 | -2.03593600 | 1.53928000  | F            | 1.72555600  | -1.74927900 | 2.32015900  |
| H         | -7.06634300 | -1.10297900 | 0.09607200  |              |             |             |             |
| Cl        | -6.51787200 | -3.34036900 | -0.43190800 | <b>19-ts</b> |             |             |             |
| <b>18</b> |             |             |             | C            | -0.87264900 | -1.77207700 | -0.00015400 |
| C         | -0.19177200 | 3.93055600  | -0.36049700 | C            | -0.14050400 | -0.59299600 | -0.00018500 |
| C         | 0.17022400  | 2.68361700  | -0.86736900 | C            | -0.79826000 | 0.66730600  | -0.00004400 |
| C         | -0.27229600 | 1.52824600  | -0.20566100 | C            | -2.21948800 | 0.68966400  | 0.00012300  |
| C         | -1.07640800 | 1.60036300  | 0.94080400  | C            | -2.94279200 | -0.49508600 | 0.00015600  |
| C         | -1.42112400 | 2.85736800  | 1.43610700  | C            | -2.27380800 | -1.72757600 | 0.00002100  |
| C         | -0.98242200 | 4.01660200  | 0.78863400  | H            | -0.35902600 | -2.72942100 | -0.00026600 |
| H         | 0.14955400  | 4.83185500  | -0.85960900 | H            | 0.94493500  | -0.60056400 | -0.00031500 |
| H         | 0.79187900  | 2.60781900  | -1.75443700 | H            | -2.72436200 | 1.65039900  | 0.00023000  |
| H         | -1.42737100 | 0.70655800  | 1.44417600  | H            | -4.02892600 | -0.46789300 | 0.00028800  |
| H         | -2.03459900 | 2.93000800  | 2.32867700  | H            | -2.84474800 | -2.65213900 | 0.00005000  |
| H         | -1.25668900 | 4.99017500  | 1.18314500  | S            | 0.11384600  | 2.13280000  | -0.00006000 |
| S         | 0.24031500  | -0.01360500 | -0.94538500 | S            | 3.91722500  | -0.62128800 | 0.00009200  |
| S         | -1.45527500 | -0.89185700 | -2.00154900 | <b>20</b>    |             |             |             |
| C         | -2.76276900 | -1.04432400 | -0.81774800 | S            | 0.00000000  | 0.00000000  | 0.00000000  |
| C         | -2.91304700 | -2.24076800 | -0.08902000 | <b>Cl-</b>   |             |             |             |
| C         | -3.71070300 | -0.01007200 | -0.69580600 | Cl           | 0.00000000  | 0.00000000  | 0.00000000  |
| C         | -4.00300400 | -2.39043300 | 0.76515400  | <b>PhCl</b>  |             |             |             |
| H         | -2.19751500 | -3.04726500 | -0.21549700 | C            | 0.50423500  | -0.00001600 | 0.00000500  |
| C         | -4.79796200 | -0.17567300 | 0.15953500  | C            | -0.17824700 | 1.21641800  | 0.00001400  |
| H         | -3.59891700 | 0.89749500  | -1.27990200 | C            | -1.57444000 | 1.20780400  | -0.00001200 |
| C         | -4.94133800 | -1.35988300 | 0.88991500  | C            | -2.27509300 | 0.00000500  | 0.00000000  |
| H         | -4.12908300 | -3.31347500 | 1.32251500  | C            | -1.57446600 | -1.20779000 | 0.00001000  |
|           |             |             |             | C            | -0.17825400 | -1.21642000 | -0.00000800 |



H 0.37488000 2.14968600 0.00001000  
H -2.11247300 2.15180800 -0.00001700  
H -3.36124500 0.00002600 -0.00000700  
H -2.11248200 -2.15180300 0.00001000  
H 0.37483100 -2.14971400 -0.00001700  
Cl 2.26435700 0.00000000 -0.00000200  
**Cl2**  
Cl 0.00000000 0.00000000 1.02240700  
Cl 0.00000000 0.00000000 -1.02240700  
**F-**  
F 0.00000000 0.00000000 0.00000000

## 6.6 Energy profiles for the competing pathway

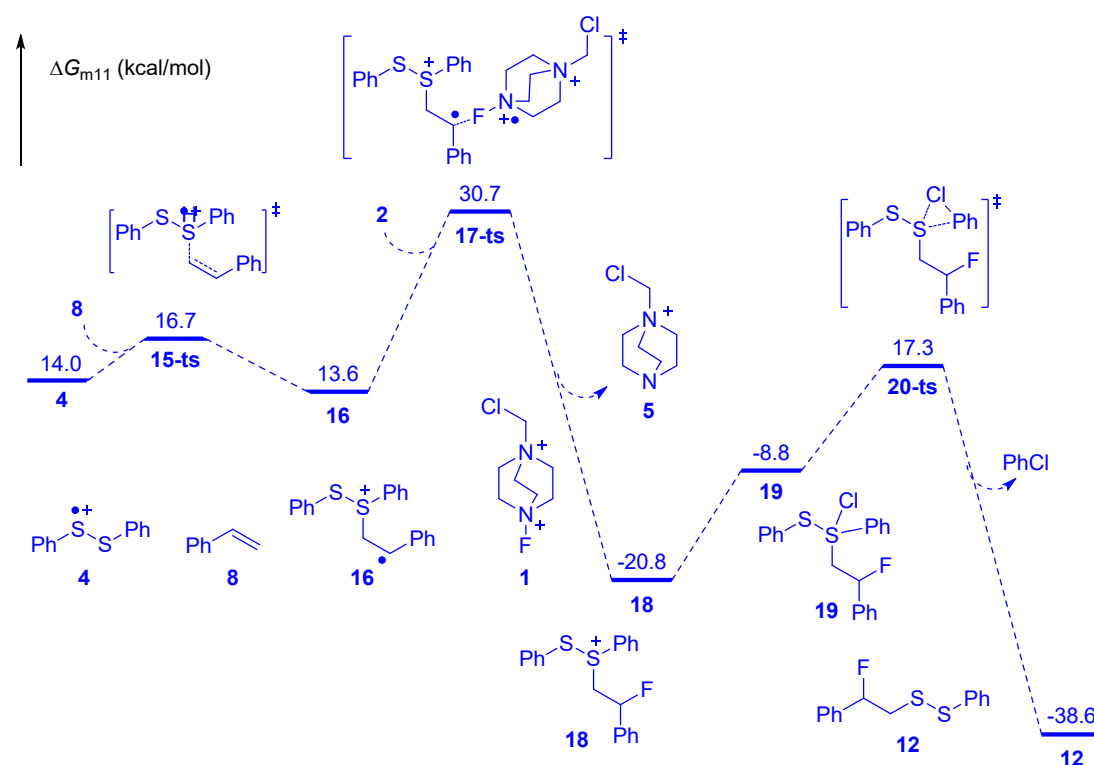

**Figure S9.** Energy profiles for the competing pathway. Calculations were performed at the M11/6-311+G(d,p)/SMD(acetonitrile)//B3LYP/6-31G(d) level of theory.

## 6.7 Reference

1. a) A. D. Becke, *J. Chem. Phys.* **1993**, *98*, 5648; b) C. Lee, W. Yang, R. G. Parr, *Phys. Rev. B* **1988**, *37*, 785.
2. Peverati, R.; Truhlar, D. G. *J. Phys. Chem. Lett.* **2011**, *2*, 2810.
3. a) A. V. Marenich, C. J. Cramer, D. G. Truhlar, *J. Phys. Chem. B* **2009**, *113*, 6378; b) Zhao, Y.; Truhlar, D. G. *J. Chem. Phys.* **2006**, *125*, 194101.

## 7. Characterization data

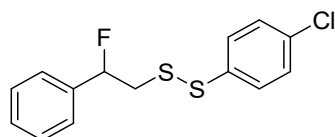

**1-(4-chlorophenyl)-2-(2-fluoro-2-phenylethyl)disulfane (C1).** White solid (108.8 mg, 73%). Mp: 96-97°C. <sup>1</sup>H NMR (400 MHz, CDCl<sub>3</sub>) δ 7.68-7.58 (m, 2H), 7.57-7.49 (m, 2H), 7.49-7.46 (m, 1H), 7.46-7.30 (m, 4H), 5.46-5.17 (m, 1H), 3.70-3.24 (m, 2H). <sup>13</sup>C NMR (101 MHz, CDCl<sub>3</sub>) δ 141.9 (d, *J* = 26.4 Hz), 138.5 (dd, *J* = 93.6, 40.8 Hz), 129.8 (d, *J* = 5.6 Hz), 129.1 (d, *J* = 11.8 Hz), 127.3, 127.0, 125.6, 125.3, 67.6 (d, *J* = 80.0 Hz), 56.0 (d, *J* = 14.5 Hz). <sup>19</sup>F NMR (376 MHz, CDCl<sub>3</sub>) δ -220.5 ppm. HRMS calcd for C<sub>14</sub>H<sub>13</sub>ClFS<sub>2</sub> {[M+H]<sup>+</sup>}:299.0131, found 299.0126.

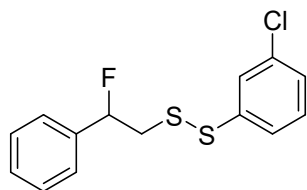

**1-(3-chlorophenyl)-2-(2-fluoro-2-phenylethyl)disulfane (C2).** White solid (99.8 mg, 67%). Mp: 60-61°C. <sup>1</sup>H NMR (400 MHz, CDCl<sub>3</sub>) δ 7.67 (d, *J* = 14.1 Hz, 1H), 7.51-7.33 (m, 8H), 5.47-5.21 (m, 1H), 3.71-3.26 (m, 2H). <sup>13</sup>C NMR (101 MHz, CDCl<sub>3</sub>) δ 145.6 (d, *J* = 21.3 Hz), 138.6 (d, *J* = 58.2 Hz), 135.9 (d, *J* = 2.5 Hz), 131.6 (d, *J* = 23.9 Hz), 130.7 (d, *J* = 2.9 Hz), 129.1 (d, *J* = 14.6 Hz), 127.5, 127.0, 124.0 (d, *J* = 14.6 Hz), 122.1 (d, *J* = 21.0 Hz), 67.5 (d, *J* = 69.1 Hz), 56.0 (d, *J* = 14.2 Hz). <sup>19</sup>F NMR (376 MHz, CDCl<sub>3</sub>) δ -220.5. HRMS calcd for C<sub>14</sub>H<sub>13</sub>ClFS<sub>2</sub> {[M+H]<sup>+</sup>}: 299.0131, found 299.0126.

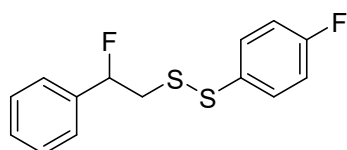

**1-(2-fluoro-2-phenylethyl)-2-(4-fluorophenyl)disulfane (C3).** Colorless viscous oil (91.6 mg, 65%). <sup>1</sup>H NMR (400 MHz, CDCl<sub>3</sub>) δ 7.73-7.63 (m, 2H), 7.61-7.50 (m, 2H), 7.49-7.46 (m, 1H), 7.45-7.32 (m, 4H), 5.46-5.17 (m, 1H), 3.70-3.24 (m, 2H). <sup>13</sup>C NMR (101 MHz, CDCl<sub>3</sub>) δ 142.5 (d, *J* = 26.4 Hz), 138.7 (d, *J* = 56.6 Hz), 132.7 (d, *J* = 5.9 Hz), 129.1 (d, *J* = 12.2 Hz), 127.3, 127.0, 125.7, 125.5, 67.5 (d, *J* = 79.0 Hz), 56.0 (d, *J* = 14.9 Hz). <sup>19</sup>F NMR (376 MHz, CDCl<sub>3</sub>) δ -103.5 (d, *J* = 353.1 Hz), -220.6. HRMS calcd for C<sub>14</sub>H<sub>13</sub>F<sub>2</sub>S<sub>2</sub> {[M+H]<sup>+</sup>}: 283.0427, found 283.0423.

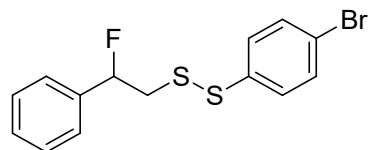

**1-(4-bromophenyl)-2-(2-fluoro-2-phenylethyl)disulfane (C4).** White solid (116.3 mg, 68%). Mp: 115-116°C. <sup>1</sup>H NMR (400 MHz, CDCl<sub>3</sub>) δ 7.72-7.67 (m, 2H), 7.57-7.52 (m, 2H), 7.49-7.36 (m, 5H), 5.46-5.17 (m, 1H), 3.70-3.24 (m, 2H). <sup>13</sup>C NMR (101 MHz, CDCl<sub>3</sub>) δ 165.9 (d, *J* = 13.9 Hz), 163.4 (d, *J* = 13.5 Hz), 138.8 (d, *J* = 59.2 Hz), 129.1 (d, *J* = 11.3 Hz), 127.3, 127.0, 126.4 (dd, *J* = 24.1, 8.9 Hz), 116.9 (dd, *J* = 22.6, 5.7 Hz), 67.6 (d, *J* = 80.5 Hz), 56.1 (d, *J* = 10.8 Hz). <sup>19</sup>F NMR (376 MHz, CDCl<sub>3</sub>) δ -220.6. HRMS calcd for C<sub>14</sub>H<sub>13</sub>BrFS<sub>2</sub> {[M+H]<sup>+</sup>}: 342.9626, found 342.9621.

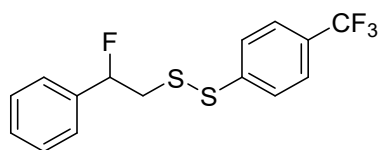

**1-(2-fluoro-2-phenylethyl)-2-(4-(trifluoromethyl)phenyl)disulfane (C5).** White solid (116.2 mg, 70%). Mp: 81-82°C. <sup>1</sup>H NMR (400 MHz, CDCl<sub>3</sub>) δ 7.93-7.72 (m, 3H), 7.64-7.28 (m, 6H), 5.49-5.24 (m, 1H), 3.80-3.26 (m, 2H). <sup>13</sup>C NMR (101 MHz, CDCl<sub>3</sub>) δ 138.5 (d, *J* = 53.5 Hz), 129.5, 129.2, 129.1, 127.3, 127.0, 126.5, 124.6, 124.3, 67.4 (d, *J* = 67.7 Hz), 55.8 (d, *J* = 18.6 Hz). <sup>19</sup>F NMR (376 MHz, CDCl<sub>3</sub>) δ -62.87 (d, *J* = 10.4 Hz), -220.4. HRMS calcd for C<sub>15</sub>H<sub>13</sub>F<sub>4</sub>S<sub>2</sub> {[M+H]<sup>+</sup>}: 333.0395, found 333.0387.

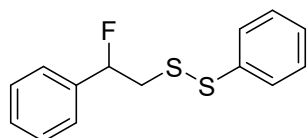

**1-(2-fluoro-2-phenylethyl)-2-phenyldisulfane (C6).** Colorless viscous oil, (72.6 mg, 55%). <sup>1</sup>H NMR (400 MHz, CDCl<sub>3</sub>) δ 7.70-7.63 (m, 2H), 7.56-7.40 (m, 6H), 7.38-7.32 (m, 2H), 5.47-5.18 (m, 1H), 3.73-3.24 (m, 2H). <sup>13</sup>C NMR (101 MHz, CDCl<sub>3</sub>) δ 143.4 (d, *J* = 23.1 Hz), 138.9 (d, *J* = 59.8 Hz), 131.5 (d, *J* = 22.8 Hz), 129.5 (d, *J* = 3.7 Hz), 129.1 (d, *J* = 11.6 Hz), 127.3, 127.0, 124.0 (d, *J* = 19.2 Hz), 67.6 (d, *J* = 78.0 Hz), 56.2 (d, *J* = 5.6 Hz). <sup>19</sup>F NMR (376 MHz, CDCl<sub>3</sub>) δ -220.7. HRMS calcd for C<sub>14</sub>H<sub>14</sub>FS<sub>2</sub> {[M+H]<sup>+</sup>}: 265.0521, found 265.0514.

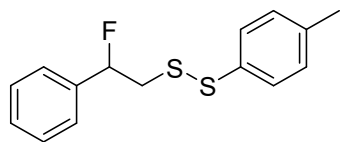

**1-(2-fluoro-2-phenylethyl)-2-(p-tolyl)disulfane (C7).** White solid (98.7 mg, 71%). Mp: 85-86°C. <sup>1</sup>H NMR (400 MHz, CDCl<sub>3</sub>) δ 7.5-7.54 (m, 2H), 7.49-7.33 (m, 6H), 5.45-5.14 (m, 1H), 3.75-3.18 (m, 2H), 2.44 (d, *J* = 8.9 Hz, 3H). <sup>13</sup>C NMR (101 MHz, CDCl<sub>3</sub>) δ 142.1 (d, *J* = 25.1 Hz), 139.6 (dd, *J* = 123.5, 43.3 Hz), 130.2 (d, *J* = 4.5 Hz), 129.1, 128.97, 127.3, 127.0, 124.9 (d, *J* = 19.7 Hz), 67.6 (d, *J* = 82.3 Hz), 56.2, 21.4 (d, *J* = 5.5 Hz). <sup>19</sup>F NMR (376 MHz, CDCl<sub>3</sub>) δ -220.6. HRMS calcd for C<sub>15</sub>H<sub>16</sub>FS<sub>2</sub> {[M+H]<sup>+</sup>}: 279.0677, found 279.0672.

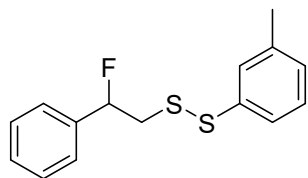

**1-(2-fluoro-2-phenylethyl)-2-(m-tolyl)disulfane (C8).** White solid (86.2 mg, 62%). Mp: 71-72°C. <sup>1</sup>H NMR (400 MHz, CDCl<sub>3</sub>) δ 7.99-7.87 (m, 1H), 7.52 (d, *J* = 6.6 Hz, 1H), 7.49-7.32 (m, 6H), 7.24-7.19 (m, 1H), 5.53-5.31 (m, 1H), 3.53-3.09 (m, 2H), 2.32 (d, *J* = 106.0 Hz, 3H). <sup>13</sup>C NMR (101 MHz, CDCl<sub>3</sub>) δ 141.7 (d, *J* = 2.1 Hz), 139.0 (d, *J* = 58.0 Hz), 134.4 (d, *J* = 6.6 Hz), 131.1 (d, *J* = 11.4 Hz), 130.9 (d, *J* = 1.7 Hz), 129.4, 129.0 (d, *J* = 13.6 Hz), 127.3, 127.0, 123.6 (d, *J* = 21.4 Hz), 66.2 (d, *J* = 70.1 Hz), 56.5 (d, *J* = 26.5 Hz), 18.0 (d, *J* = 18.0 Hz). δ -220.6. HRMS calcd for C<sub>15</sub>H<sub>16</sub>FS<sub>2</sub> {[M+H]<sup>+</sup>}: 279.0677, found 279.0671.

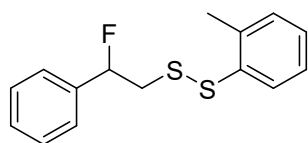

**1-(2-fluoro-2-phenylethyl)-2-(o-tolyl)disulfane (C9).** White solid (87.6 mg, 63%). Mp: 78-79°C. <sup>1</sup>H NMR (400 MHz, CDCl<sub>3</sub>) δ 7.49 (d, *J* = 10.0 Hz, 2H), 7.44-7.42 (m, 4H), 7.40-7.25 (m, 3H), 5.47-5.18 (m, 1H), 3.71-3.26 (m, 2H), 2.44 (d, *J* = 7.2 Hz, 3H). <sup>13</sup>C NMR (101 MHz, CDCl<sub>3</sub>) δ 143.3 (d, *J* = 18.5 Hz), 139.8 (d, *J* = 5.3 Hz), 138.9 (d, *J* = 63.0 Hz), 132.3 (d, *J* = 24.0 Hz), 129.3 (d, *J* = 1.6 Hz), 129.0 (d, *J* = 12.4 Hz), 127.4, 127.0, 124.2 (d, *J* = 15.8 Hz), 121.1 (d, *J* = 20.1 Hz), 67.6 (d, *J* = 72.8 Hz), 56.3, 21.4 (d, *J* = 3.4 Hz). <sup>19</sup>F NMR (376 MHz, CDCl<sub>3</sub>) δ -220.3. HRMS calcd for C<sub>15</sub>H<sub>16</sub>FS<sub>2</sub> {[M+H]<sup>+</sup>}: 279.0677, found 279.0672.

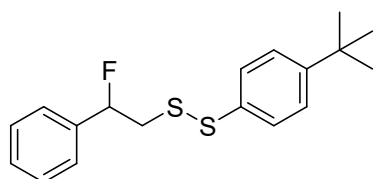

**1-(4-(tert-butyl)phenyl)-2-(2-fluoro-2-phenylethyl)disulfane (C10).** White solid (115.2 mg, 72%). Mp: 97-98°C. <sup>1</sup>H NMR (400 MHz, CDCl<sub>3</sub>) δ 7.60-7.54 (m, 4H), 7.50-7.34 (m, 5H), 5.47-5.18 (m, 1H), 3.75-3.24 (m, 2H), 1.36 (d, *J* = 7.5 Hz, 9H). <sup>13</sup>C NMR (101 MHz, CDCl<sub>3</sub>) δ 155.3 (d, *J* = 26.7 Hz), 139.5 (dd, *J* = 109.7, 40.7 Hz), 129.3, 129.0 (d, *J* = 12.4 Hz), 127.4, 127.0, 126.6 (d, *J* = 5.0 Hz), 123.9 (d, *J* = 20.8 Hz), 67.5 (d, *J* = 70.3 Hz), 56.3 (d, *J* = 7.4 Hz), 35.1 (d, *J* = 4.7 Hz), 31.2 (s). <sup>19</sup>F NMR (376 MHz, CDCl<sub>3</sub>) δ -220.5. HRMS calcd for C<sub>18</sub>H<sub>22</sub>FS<sub>2</sub> {[M+H]<sup>+</sup>}:321.1147, found 321.1142.

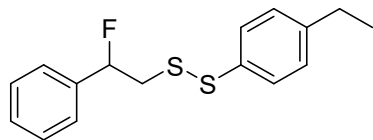

**1-(4-ethylphenyl)-2-(2-fluoro-2-phenylethyl)disulfane (C11).** White solid (99.3 mg, 68%). Mp: 93-94°C. <sup>1</sup>H NMR (400 MHz, CDCl<sub>3</sub>) δ 7.68-7.56 (m, 2H), 7.50-7.30 (m, 7H), 5.46-5.16 (m, 1H), 3.73-3.26 (m, 2H), 2.78-2.67 (m, 2H), 1.27 (dd, *J* = 16.0, 7.7 Hz, 3H). <sup>13</sup>C NMR (101 MHz, CDCl<sub>3</sub>) δ 148.4 (d, *J* = 24.2 Hz), 139.7 (dd, *J* = 137.1, 41.9 Hz), 129.3, 129.08, 129.0 (d, *J* = 6.2 Hz), 127.3, 127.02, 124.2 (d, *J* = 20.0 Hz), 67.6 (d, *J* = 76.2 Hz), 56.3 (d, *J* = 3.0 Hz), 28.8 (d, *J* = 2.8 Hz), 15.4 (d, *J* = 3.9 Hz). HRMS calcd for C<sub>16</sub>H<sub>18</sub>FS<sub>2</sub> {[M+H]<sup>+</sup>}: 293.0834, found 293.0831.

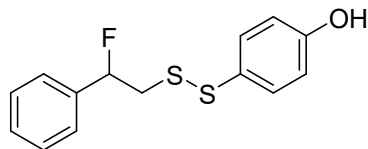

**4-((2-fluoro-2-phenylethyl)disulfanyl)phenol (C12).** Colorless viscous oil (78.4 mg, 56%). <sup>1</sup>H NMR (400 MHz, CDCl<sub>3</sub>) δ 7.56-7.53 (m, 1H), 7.51-7.30 (m, 5H), 7.00-6.96 (m, 2H), 6.83-6.77 (m, 1H), 5.38-5.01 (m, 1H), 3.83-3.29 (m, 2H), 2.97 (d, *J* = 30.4 Hz, 1H). <sup>13</sup>C NMR (101 MHz, CDCl<sub>3</sub>) δ 160.2 (dd, *J* = 104.8, 81.5 Hz), 138.6, 130.2, 129.1, 127.0 (dd, *J* = 24.2, 15.4 Hz), 117.0 (d, *J* = 5.9 Hz), 116.7, 115.6, 56.1, 29.7. <sup>19</sup>F NMR (376 MHz, CDCl<sub>3</sub>) δ -220.6. HRMS calcd for C<sub>14</sub>H<sub>14</sub>FOS<sub>2</sub> {[M+H]<sup>+</sup>}:281.0470, found 281.0459.

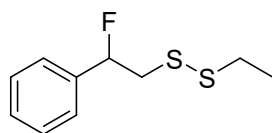

**1-ethyl-2-(2-fluoro-2-phenylethyl)disulfane (C13).** White solid (68.0 mg, 63%). Mp: 78-79°C. <sup>1</sup>H NMR (400 MHz, CDCl<sub>3</sub>) δ 7.60-7.34 (m, 5H), 5.44-5.36 (m, 1H), 3.55-3.15 (m, 2H), 2.81-2.75 (m, 2H), 1.41-1.31 (m, 3H). <sup>13</sup>C NMR (101 MHz, CDCl<sub>3</sub>) δ 139.2 (d, *J* = 84.0 Hz), 129.3, 129.1, 127.1 (d, *J* = 37.7 Hz), 61.6 (d, *J* = 63.1 Hz), 56.1 (d, *J* = 15.5 Hz), 46.3 (d, *J* = 5.7 Hz), 6.7 (d, *J* = 11.9 Hz). <sup>19</sup>F NMR (376 MHz, CDCl<sub>3</sub>) δ -227.0. HRMS calcd for C<sub>10</sub>H<sub>14</sub>FS<sub>2</sub> {[M+H]<sup>+</sup>}: 217.0521, found 217.0512.

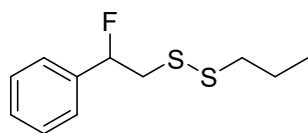

**1-(2-fluoro-2-phenylethyl)-2-propyldisulfane (C14).** White solid (73.6 mg, 64%). Mp: 81-82°C. <sup>1</sup>H NMR (400 MHz, CDCl<sub>3</sub>) δ 7.50-7.38 (m, 5H), 5.45-5.36 (m, 1H), 3.55-3.16 (m, 2H), 2.83-2.57 (m, 2H), 1.90-1.76 (m, 2H), 1.14-1.03 (m, 3H). <sup>13</sup>C NMR (101 MHz, CDCl<sub>3</sub>) δ 139.2 (d, *J* = 83.9 Hz), 129.3, 129.1, 127.1 (d, *J* = 38.1 Hz), 62.3 (d, *J* = 64.8 Hz), 56.1 (d, *J* = 18.9 Hz), 54.9, 16.3 (d, *J* = 11.2 Hz).

Hz), 13.4 (d,  $J = 7.4$  Hz).  $^{19}\text{F}$  NMR (376 MHz,  $\text{CDCl}_3$ )  $\delta$  -227.4. HRMS calcd for  $\text{C}_{11}\text{H}_{16}\text{FS}_2$   $\{[\text{M}+\text{H}]^+\}$ : 231.0677, found 231.0674.

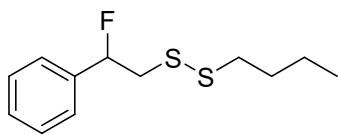

**1-butyl-2-(2-fluoro-2-phenylethyl)disulfane (C15).** White solid (73.2 mg, 60%). Mp: 86-87°C.  $^1\text{H}$  NMR (400 MHz,  $\text{CDCl}_3$ )  $\delta$  7.54-7.31 (m, 5H), 5.44-5.36 (m, 1H), 3.55-3.13 (m, 2H), 2.82-2.61 (m, 2H), 1.83-1.65 (m, 2H), 1.58-1.39 (m, 2H), 1.00-0.92 (m, 3H).  $^{13}\text{C}$  NMR (101 MHz,  $\text{CDCl}_3$ )  $\delta$  139.2 (d,  $J = 84.5$  Hz), 129.3, 129.1, 127.2 (d,  $J = 37.7$  Hz), 62.2 (d,  $J = 62.2$  Hz), 56.1 (d,  $J = 17.6$  Hz), 52.7 (d,  $J = 4.2$  Hz), 24.5 (d,  $J = 10.6$  Hz), 22.0 (d,  $J = 7.4$  Hz), 13.7 (d,  $J = 3.4$  Hz).  $^{19}\text{F}$  NMR (376 MHz,  $\text{CDCl}_3$ )  $\delta$  -220.6. HRMS calcd for  $\text{C}_{12}\text{H}_{18}\text{FS}_2$   $\{[\text{M}+\text{H}]^+\}$ : 245.0834, found 245.0830.

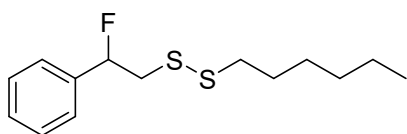

**1-(2-fluoro-2-phenylethyl)-2-hexyldisulfane (C16).** White solid (74.8 mg, 55%). Mp: 92-93°C.  $^1\text{H}$  NMR (400 MHz,  $\text{CDCl}_3$ )  $\delta$  7.50-7.33 (m, 5H), 5.43-5.35 (m, 1H), 3.54-3.14 (m, 2H), 2.75-2.63 (m, 2H), 1.82-1.71 (m, 2H), 1.50-1.42 (m, 1H), 1.39-1.21 (m, 5H), 0.93-0.84 (m, 3H).  $^{13}\text{C}$  NMR (101 MHz,  $\text{CDCl}_3$ )  $\delta$  139.2 (d,  $J = 83.4$  Hz), 129.3, 129.0, 127.1 (d,  $J = 37.5$  Hz), 62.2 (d,  $J = 60.8$  Hz), 56.1 (d,  $J = 18.0$  Hz), 53.0 (d,  $J = 4.4$  Hz), 31.3 (d,  $J = 3.4$  Hz), 28.4 (d,  $J = 7.7$  Hz), 22.5 (d,  $J = 10.2$  Hz), 22.4 (d,  $J = 3.4$  Hz), 13.9 (d,  $J = 2.0$  Hz).  $^{19}\text{F}$  NMR (376 MHz,  $\text{CDCl}_3$ )  $\delta$  -220.0. HRMS calcd for  $\text{C}_{14}\text{H}_{22}\text{FS}_2$   $\{[\text{M}+\text{H}]^+\}$ : 273.1147, found 273.1141.

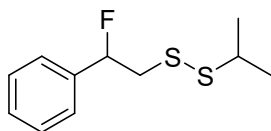

**1-(2-fluoro-2-phenylethyl)-2-isopropyldisulfane (C17).** White solid (67.9 mg, 59%). Mp: 76-76°C.  $^1\text{H}$  NMR (400 MHz,  $\text{CDCl}_3$ )  $\delta$  7.51-7.34 (m, 5H), 5.47-5.31 (m, 1H), 3.45-3.05 (m, 2H), 2.87-2.82 (m, 1H), 1.37-1.23 (m, 6H).  $^{13}\text{C}$  NMR (101 MHz,  $\text{CDCl}_3$ )  $\delta$  139.3 (d,  $J = 99.9$  Hz), 129.3, 129.0, 127.2 (d,  $J = 41.9$  Hz), 58.9 (d,  $J = 64.8$  Hz), 56.4 (d,  $J = 8.3$  Hz), 51.1 (d,  $J = 12.0$  Hz), 15.3 (dd,  $J = 104.4$ , 15.4 Hz).  $^{19}\text{F}$  NMR (376 MHz,  $\text{CDCl}_3$ )  $\delta$  -226.8. HRMS calcd for  $\text{C}_{11}\text{H}_{16}\text{FS}_2$   $\{[\text{M}+\text{H}]^+\}$ : 231.0677, found 231.0687.

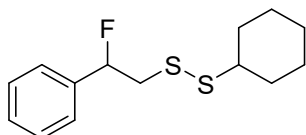

**1-cyclohexyl-2-(2-fluoro-2-phenylethyl)disulfane (C18).** White solid (86.4 mg, 64%). Mp: 68-69°C.  $^1\text{H}$  NMR (400 MHz,  $\text{CDCl}_3$ )  $\delta$  7.49-7.36 (m, 5H), 5.46-5.36 (m, 1H), 3.49-3.11 (m, 2H), 2.62 (s, 1H), 2.12 (s, 1H), 1.93-1.83 (m, 4H), 1.73-1.69 (m, 1H), 1.35-1.27 (m, 4H).  $^{13}\text{C}$  NMR (101 MHz,  $\text{CDCl}_3$ )  $\delta$  139.3 (d,  $J = 99.3$  Hz), 129.2, 128.99, 127.2 (d,  $J = 40.9$  Hz), 59.5 (dd,  $J = 67.0$ , 39.4 Hz), 56.4 (d,  $J = 10.8$  Hz), 26.2 (d,  $J = 6.8$  Hz), 25.4 (dd,  $J = 10.1$ , 4.2 Hz), 25.2 (d,  $J = 3.0$  Hz), 24.8.  $^{19}\text{F}$  NMR (376 MHz,  $\text{CDCl}_3$ )  $\delta$  -220.6. HRMS calcd for  $\text{C}_{14}\text{H}_{20}\text{FS}_2$   $\{[\text{M}+\text{H}]^+\}$ : 271.0990, found 271.0996.

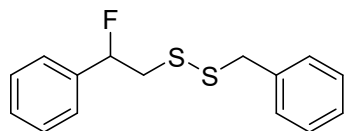

**1-benzyl-2-(2-fluoro-2-phenylethyl)disulfane (C19).** White solid (100.0 mg, 72%). Mp: 103-104°C. <sup>1</sup>H NMR (400 MHz, CDCl<sub>3</sub>) δ 7.43-7.37 (m, 8H), 7.32-7.26 (m, 2H), 5.39-5.28 (m, 1H), 4.13-4.02 (m, 2H), 3.44-3.07 (m, 2H). <sup>13</sup>C NMR (101 MHz, CDCl<sub>3</sub>) δ 139.0 (d, *J* = 88.0 Hz), 130.1 (d, *J* = 1.6 Hz), 129.3 (d, *J* = 4.4 Hz), 129.1 (d, *J* = 3.4 Hz), 129.0 (d, *J* = 2.2 Hz), 128.7, 127.3, 127.0, 60.7 (d, *J* = 80.9 Hz), 58.7, 56.0. <sup>19</sup>F NMR (376 MHz, CDCl<sub>3</sub>) δ -220.5. HRMS calcd for C<sub>15</sub>H<sub>16</sub>FS<sub>2</sub> {[M+H]<sup>+</sup>}: 279.0677, found 279.0692.

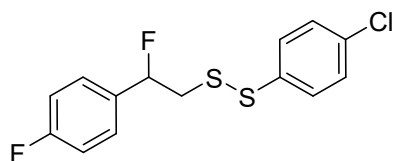

**1-(4-chlorophenyl)-2-(2-fluoro-2-(4-fluorophenyl)ethyl)disulfane (C20).** White solid (110.6 mg, 70%). Mp: 93-94°C. <sup>1</sup>H NMR (400 MHz, CDCl<sub>3</sub>) δ 7.63-7.45 (m, 4H), 7.40-7.36 (m, 1H), 7.15-7.02 (m, 2H), 5.45-5.18 (m, 1H), 3.72-3.16 (m, 2H). <sup>13</sup>C NMR (101 MHz, CDCl<sub>3</sub>) δ 163.0 (dd, *J* = 249.2, 20.7 Hz), 141.7 (d, *J* = 28.9 Hz), 137.9 (d, *J* = 25.1 Hz), 134.6 (dd, *J* = 61.9, 3.3 Hz), 129.8 (d, *J* = 6.3 Hz), 129.1 (dd, *J* = 35.6, 8.5 Hz), 125.4 (d, *J* = 20.0 Hz), 116.1 (dd, *J* = 21.9, 15.9 Hz), 67.4 (d, *J* = 79.9 Hz), 55.2 (d, *J* = 15.4 Hz). <sup>19</sup>F NMR (376 MHz, CDCl<sub>3</sub>) δ -111.6 (d, *J* = 136.8 Hz), -220.7. HRMS calcd for C<sub>14</sub>H<sub>12</sub>ClF<sub>2</sub>S<sub>2</sub> {[M+H]<sup>+</sup>}: 317.0037, found 317.0029.

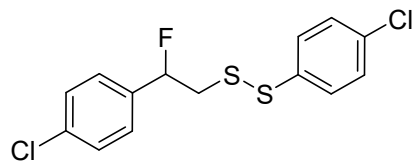

**1-(4-chlorophenyl)-2-(2-fluoro-2-(4-fluorophenyl)ethyl)disulfane (C21).** White solid (119.5 mg, 72%). Mp: 116-118°C. <sup>1</sup>H NMR (400 MHz, CDCl<sub>3</sub>) δ 7.64-7.48 (m, 4H), 7.42 (s, 2H), 7.34 (s, 2H), 5.43-5.16 (m, 1H), 3.67-3.19 (m, 2H). <sup>13</sup>C NMR (101 MHz, CDCl<sub>3</sub>) δ 141.7 (d, *J* = 27.8 Hz), 137.6 (dd, *J* = 68.1, 41.1 Hz), 135.2 (d, *J* = 28.6 Hz), 129.9 (d, *J* = 6.6 Hz), 129.3 (d, *J* = 15.3 Hz), 128.7, 128.4, 125.4 (d, *J* = 20.7 Hz), 67.3 (d, *J* = 78.8 Hz), 55.2 (d, *J* = 17.7 Hz). <sup>19</sup>F NMR (376 MHz, CDCl<sub>3</sub>) δ -221.1. HRMS calcd for C<sub>14</sub>H<sub>12</sub>Cl<sub>2</sub>FS<sub>2</sub> {[M+H]<sup>+</sup>}: 332.9742, found 332.9736.

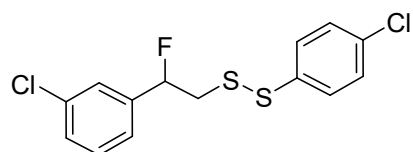

**1-(4-chlorophenyl)-2-(2-(3-chlorophenyl)-2-fluoroethyl)disulfane (C22).** White solid (111.2 mg, 67%). Mp: 104-106°C. <sup>1</sup>H NMR (400 MHz, CDCl<sub>3</sub>) δ 7.62-7.48 (m, 4H), 7.49-7.19 (m, 4H), 5.42-5.14 (m, 1H), 3.66-3.21 (m, 2H). <sup>13</sup>C NMR (101 MHz, CDCl<sub>3</sub>) δ 141.6 (d, *J* = 23.9 Hz), 140.6 (d, *J* = 51.1 Hz), 137.9 (d, *J* = 27.8 Hz), 135.0 (d, *J* = 17.4 Hz), 130.4 (d, *J* = 10.0 Hz), 129.9 (d, *J* = 8.4 Hz), 129.44 (d, *J* = 33.9 Hz), 127.35 (d, *J* = 24.7 Hz), 125.57 (d, *J* = 7.0 Hz), 125.27 (d, *J* = 4.5 Hz), 67.07 (d, *J* = 81.2 Hz), 55.0 (d, *J* = 19.2 Hz). <sup>19</sup>F NMR (376 MHz, CDCl<sub>3</sub>) δ -218.5. HRMS calcd for C<sub>14</sub>H<sub>12</sub>Cl<sub>2</sub>FS<sub>2</sub> (M+H): 332.9742, found 332.9736.

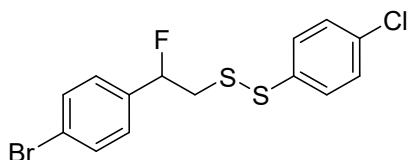

**1-(2-(4-bromophenyl)-2-fluoroethyl)-2-(4-chlorophenyl)disulfane (C23).** Light yellow solid (131.6 mg, 70%). Mp: 126-128°C. <sup>1</sup>H NMR (400 MHz, CDCl<sub>3</sub>) δ 7.62-7.49 (m, 5H), 7.37 (d, *J* = 8.5 Hz, 1H), 7.29-7.27 (m, 2H), 5.42-5.15 (m, 1H), 3.66-3.17 (m, 2H). <sup>13</sup>C NMR (101 MHz, CDCl<sub>3</sub>) δ 141.7 (d, *J* = 26.6 Hz), 137.9 (d, *J* = 23.7 Hz), 137.5, 132.3 (d, *J* = 15.1 Hz), 129.9 (d, *J* = 6.7 Hz), 128.8 (d, *J* = 33.4 Hz), 125.4 (d, *J* = 21.2 Hz), 123.4 (d, *J* = 32.2 Hz), 67.2 (d, *J* = 76.1 Hz), 55.2 (d, *J* = 17.9 Hz). <sup>19</sup>F NMR (376 MHz, CDCl<sub>3</sub>) δ -221.1. HRMS calcd for C<sub>14</sub>H<sub>12</sub>BrClFS<sub>2</sub> {[M+H]<sup>+</sup>}: 376.9236, found 376.9240.

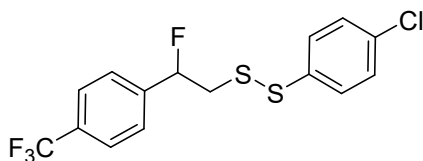

**1-(4-chlorophenyl)-2-(2-fluoro-2-(4-(trifluoromethyl)phenyl)ethyl)disulfane (C24).** White solid (124.4 mg, 68%). Mp: 114-116°C. <sup>1</sup>H NMR (400 MHz, CDCl<sub>3</sub>) δ 7.71 (d, *J* = 8.3 Hz, 1H), 7.67-7.31 (m, 7H), 5.51-5.23 (m, 1H), 3.68-3.22 (m, 2H). <sup>13</sup>C NMR (101 MHz, CDCl<sub>3</sub>) δ 142.5 (d, *J* = 49.6 Hz), 141.5 (d, *J* = 26.5 Hz), 138.0 (d, *J* = 28.3 Hz), 129.9 (d, *J* = 8.9 Hz), 127.8, 127.5, 126.1 (dd, *J* = 13.9, 3.7 Hz), 125.5, 125.2, 67.0 (d, *J* = 87.7 Hz), 54.9 (d, *J* = 26.1 Hz). <sup>19</sup>F NMR (376 MHz, CDCl<sub>3</sub>) δ -62.81 (d, *J* = 15.4 Hz), -221.8. HRMS calcd for C<sub>15</sub>H<sub>12</sub>ClF<sub>4</sub>S<sub>2</sub> {[M+H]<sup>+</sup>}: 367.0005, found 366.9997.

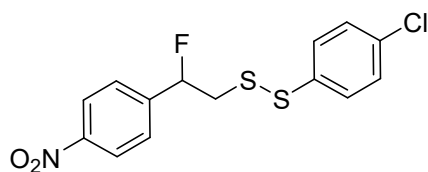

**1-(4-chlorophenyl)-2-(2-fluoro-2-(4-nitrophenyl)ethyl)disulfane (C25).** White solid (108.0 mg, 63%). Mp: 132-134°C. <sup>1</sup>H NMR (400 MHz, CDCl<sub>3</sub>) δ 8.33-8.23 (m, 2H), 7.72-7.51 (m, 6H), 5.55-5.29 (m, 1H), 3.70-3.20 (m, 2H). <sup>13</sup>C NMR (101 MHz, CDCl<sub>3</sub>) δ 148.2 (d, *J* = 24.8 Hz), 145.5 (d, *J* = 44.6 Hz), 141.4 (d, *J* = 39.9 Hz), 138.1 (d, *J* = 25.1 Hz), 130.0 (d, *J* = 7.8 Hz), 128.3 (d, *J* = 37.1 Hz), 125.4 (d, *J* = 20.5 Hz), 124.3 (d, *J* = 10.5 Hz), 66.8 (d, *J* = 118.7 Hz), 54.4 (d, *J* = 41.7 Hz). <sup>19</sup>F NMR (376 MHz, CDCl<sub>3</sub>) δ -222.5. HRMS calcd for C<sub>14</sub>H<sub>12</sub>ClFNO<sub>2</sub>S<sub>2</sub> {[M+H]<sup>+</sup>}: 343.9982, found 343.9972.

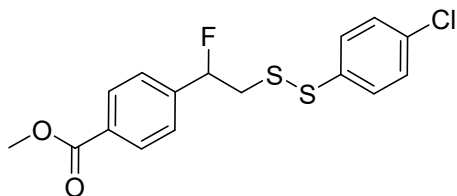

**methyl 4-(2-((4-chlorophenyl)disulfanyl)-1-fluoroethyl)benzoate (C26).** White solid (126.4 mg, 71%). Mp: 106-108°C. <sup>1</sup>H NMR (400 MHz, CDCl<sub>3</sub>) δ 8.13-7.99 (m, 2H), 7.63-7.47 (m, 6H), 5.50-5.21 (m, 1H), 3.95 (d, *J* = 9.6 Hz, 3H), 3.68-3.22 (m, 2H). <sup>13</sup>C NMR (101 MHz, CDCl<sub>3</sub>) δ 166.3 (d, *J* = 5.6 Hz), 143.3 (d, *J* = 48.5 Hz), 141.6 (d, *J* = 29.4 Hz), 138.0 (d, *J* = 25.4 Hz), 131.0 (d, *J* = 30.2 Hz), 130.4 (d, *J* = 11.2 Hz), 129.9 (d, *J* = 6.5 Hz), 127.2 (d, *J* = 33.8 Hz), 125.4 (d, *J* = 20.3 Hz), 67.1 (d, *J* = 87.2 Hz), 55.2 (d, *J* = 27.6 Hz), 52.3 (d, *J* = 3.0 Hz). <sup>19</sup>F NMR (376 MHz, CDCl<sub>3</sub>) δ -221.6. HRMS calcd for C<sub>16</sub>H<sub>15</sub>ClFO<sub>2</sub>S<sub>2</sub> {[M+H]<sup>+</sup>}: 357.0186, found 357.0182.



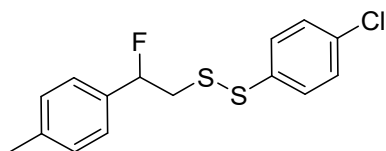

**1-(4-chlorophenyl)-2-(2-fluoro-2-(p-tolyl)ethyl)disulfane (C27).** White solid (115.4 mg, 74%). Mp: 112-114°C. <sup>1</sup>H NMR (400 MHz, CDCl<sub>3</sub>) δ 7.63-7.50 (m, 4H), 7.36 (d, *J* = 8.1 Hz, 1H), 7.29-7.23 (m, 2H), 7.17 (d, *J* = 8.0 Hz, 1H), 5.43-5.15 (m, 1H), 3.69-3.24 (m, 2H), 2.38 (d, *J* = 18.4 Hz, 3H). <sup>13</sup>C NMR (101 MHz, CDCl<sub>3</sub>) δ 142.0 (d, *J* = 22.3 Hz), 139.4 (d, *J* = 28.3 Hz), 137.7 (d, *J* = 24.0 Hz), 135.8 (d, *J* = 61.7 Hz), 129.8 (d, *J* = 1.1 Hz), 129.7 (d, *J* = 7.4 Hz), 127.1 (d, *J* = 32.2 Hz), 125.5 (d, *J* = 19.7 Hz), 67.5 (d, *J* = 64.2 Hz), 56.0 (d, *J* = 6.1 Hz), 21.2 (d, *J* = 9.1 Hz). <sup>19</sup>F NMR (376 MHz, CDCl<sub>3</sub>) δ -220.3. HRMS calcd for C<sub>15</sub>H<sub>15</sub>ClFS<sub>2</sub> {[M+H]<sup>+</sup>}: 313.0288, found 313.0283.

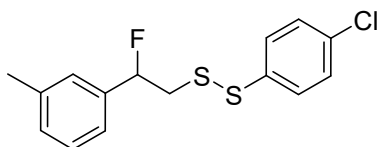

**1-(4-chlorophenyl)-2-(2-fluoro-2-(m-tolyl)ethyl)disulfane (C28).** White solid (106.1 mg, 68%). Mp: 96-97°C. <sup>1</sup>H NMR (400 MHz, CDCl<sub>3</sub>) δ 7.63-7.50 (m, 4H), 7.33-7.13 (m, 4H), 5.42-5.13 (m, 1H), 3.71-3.15 (m, 2H), 2.38 (d, *J* = 21.7 Hz, 3H). <sup>13</sup>C NMR (101 MHz, CDCl<sub>3</sub>) δ 141.9 (d, *J* = 22.8 Hz), 139.0 (d, *J* = 12.9 Hz), 138.3, 137.7 (d, *J* = 26.3 Hz), 130.1 (d, *J* = 32.5 Hz), 129.8 (d, *J* = 7.4 Hz), 129.0 (d, *J* = 12.0 Hz), 127.8 (d, *J* = 38.1 Hz), 125.5 (d, *J* = 23.3 Hz), 124.2 (d, *J* = 23.2 Hz), 67.5 (d, *J* = 75.7 Hz), 56.1 (d, *J* = 7.8 Hz), 21.4 (d, *J* = 9.1 Hz). <sup>19</sup>F NMR (376 MHz, CDCl<sub>3</sub>) δ -220.3. HRMS calcd for C<sub>15</sub>H<sub>15</sub>ClFS<sub>2</sub> {[M+H]<sup>+</sup>}: 313.0288, found 313.0282.

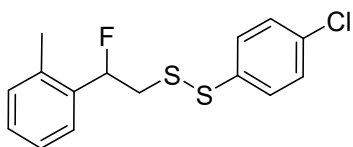

**1-(4-chlorophenyl)-2-(2-fluoro-2-(o-tolyl)ethyl)disulfane (C29).** White solid (99.8 mg, 64%). Mp: 106-108°C. <sup>1</sup>H NMR (400 MHz, CDCl<sub>3</sub>) δ 7.65-7.51 (m, 4H), 7.44-7.12 (m, 4H), 5.77-5.42 (m, 1H), 3.78-3.18 (m, 2H), 2.43 (d, *J* = 26.4 Hz, 3H). <sup>13</sup>C NMR (101 MHz, CDCl<sub>3</sub>) δ 142.0 (d, *J* = 22.1 Hz), 137.8 (d, *J* = 29.9 Hz), 136.7 (d, *J* = 46.1 Hz), 135.8 (d, *J* = 46.0 Hz), 131.1 (d, *J* = 9.5 Hz), 129.8 (d, *J* = 6.2 Hz), 129.1 (d, *J* = 22.4 Hz), 126.9 (d, *J* = 22.8 Hz), 126.5, 125.4 (d, *J* = 23.0 Hz), 66.7 (d, *J* = 73.8 Hz), 52.2 (d, *J* = 48.2 Hz), 19.1. <sup>19</sup>F NMR (376 MHz, CDCl<sub>3</sub>) δ -219.2. HRMS calcd for C<sub>15</sub>H<sub>15</sub>ClFS<sub>2</sub> {[M+H]<sup>+</sup>}: 313.0288, found 313.0283.

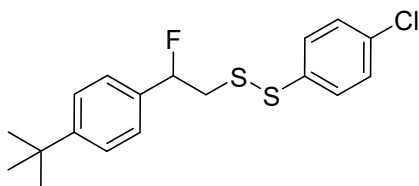

**1-(2-(4-(tert-butyl)phenyl)-2-fluoroethyl)-2-(4-chlorophenyl)disulfane (C30).** White solid (118.6 mg, 67%). Mp: 134-136°C. <sup>1</sup>H NMR (400 MHz, CDCl<sub>3</sub>) δ 7.65-7.48 (m, 4H), 7.45-7.31 (m, 4H), 5.46-5.14 (m, 1H), 3.72-3.24 (m, 2H), 1.33 (d, *J* = 15.1 Hz, 9H). <sup>13</sup>C NMR (101 MHz, CDCl<sub>3</sub>) δ 152.5 (d, *J* = 24.0 Hz), 142.0 (d, *J* = 16.9 Hz), 137.7 (d, *J* = 30.1 Hz), 135.6 (d, *J* = 64.4 Hz), 129.8 (d, *J* = 8.6 Hz), 126.8 (d, *J* = 29.1 Hz), 126.0 (d, *J* = 13.9 Hz), 125.5 (d, *J* = 26.6 Hz), 67.4 (d, *J* = 71.9 Hz), 55.9 (d, *J* =

5.1 Hz), 34.7 (d,  $J = 7.0$  Hz), 31.2 (d,  $J = 3.1$  Hz).  $^{19}\text{F}$  NMR (376 MHz,  $\text{CDCl}_3$ )  $\delta$  -220.4. HRMS calcd for  $\text{C}_{18}\text{H}_{21}\text{ClF}_4\text{S}_2$   $\{[\text{M}+\text{H}]^+\}$ : 355.0757, found 355.0752.

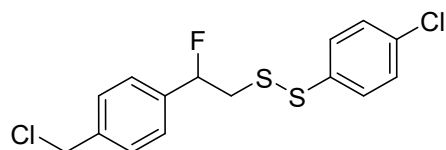

**1-(2-(4-(chloromethyl)phenyl)-2-fluoroethyl)-2-(4-chlorophenyl)disulfane. (C31)** White solid (110.7 mg, 64%). Mp: 122-124°C.  $^1\text{H}$  NMR (400 MHz,  $\text{CDCl}_3$ )  $\delta$  7.63-7.47 (m, 5H), 7.40 (s, 2H), 7.28 (s, 1H), 5.47-5.16 (m, 1H), 4.62 (s, 1H), 4.58 (s, 1H), 3.69-3.23 (m, 2H).  $^{13}\text{C}$  NMR (101 MHz,  $\text{CDCl}_3$ )  $\delta$  141.8 (d,  $J = 22.9$  Hz), 139.0 (d,  $J = 40.1$  Hz), 138.6 (d,  $J = 5.5$  Hz), 137.9 (d,  $J = 26.8$  Hz), 129.8 (d,  $J = 7.0$  Hz), 129.3 (d,  $J = 11.3$  Hz), 127.6 (d,  $J = 32.4$  Hz), 125.4 (d,  $J = 23.0$  Hz).  $^{19}\text{F}$  NMR (376 MHz,  $\text{CDCl}_3$ )  $\delta$  -220.9. HRMS calcd for  $\text{C}_{15}\text{H}_{14}\text{Cl}_2\text{FS}_2$  (M+H): 346.9898, found 346.9893.

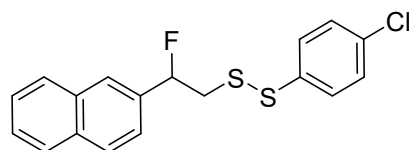

**1-(4-chlorophenyl)-2-(2-fluoro-2-(naphthalen-2-yl)ethyl)disulfane. (C32)** White solid (114.8 mg, 66%). Mp: 108-110°C.  $^1\text{H}$  NMR (400 MHz,  $\text{CDCl}_3$ )  $\delta$  7.96-7.82 (m, 4H), 7.77-7.31 (m, 7H), 5.64-5.37 (m, 1H), 3.78-3.34 (m, 2H).  $^{13}\text{C}$  NMR (101 MHz,  $\text{CDCl}_3$ )  $\delta$  141.8 (d,  $J = 18.3$  Hz), 137.8 (d,  $J = 25.4$  Hz), 135.8 (d,  $J = 65.4$  Hz), 133.5 (d,  $J = 20.2$  Hz), 133.0, 129.8 (d,  $J = 8.2$  Hz), 129.3 (d,  $J = 29.8$  Hz), 128.2 (d,  $J = 18.3$  Hz), 127.8 (d,  $J = 6.8$  Hz), 127.1 (d,  $J = 2.0$  Hz), 127.0-126.8 (m), 126.3, 125.4 (d,  $J = 20.4$  Hz), 124.1 (d,  $J = 18.0$  Hz), 67.4 (d,  $J = 51.9$  Hz), 56.3.  $^{19}\text{F}$  NMR (376 MHz,  $\text{CDCl}_3$ )  $\delta$  -220.1. HRMS calcd for  $\text{C}_{18}\text{H}_{15}\text{ClFS}_2$  (M+H): 349.0288, found 349.0280.

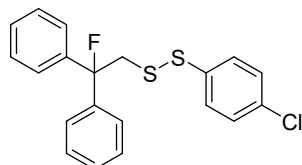

**1-(4-chlorophenyl)-2-(2-fluoro-2,2-diphenylethyl)disulfane (C33).** White solid (87.9 mg, 47%). Mp: 88-90°C.  $^1\text{H}$  NMR (400 MHz,  $\text{CDCl}_3$ )  $\delta$  7.69-7.58 (m, 3H), 7.56-7.45 (m, 3H), 7.43-7.35 (m, 3H), 7.32-7.22 (m, 7H), 3.70-3.57 (m, 2H).  $^{13}\text{C}$  NMR (101 MHz,  $\text{CDCl}_3$ )  $\delta$  145.6, 143.9, 142.3, 137.2, 129.9, 128.6, 128.4, 127.8, 127.6, 126.6, 125.62, 125.4, 78.4, 66.9.  $^{19}\text{F}$  NMR (376 MHz,  $\text{CDCl}_3$ )  $\delta$  -220.3. HRMS calcd for  $\text{C}_{20}\text{H}_{17}\text{ClFS}_2$   $\{[\text{M}+\text{H}]^+\}$ : 375.0444, found 375.0439.

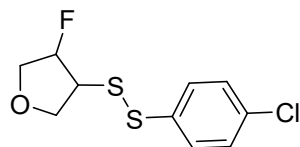

**3-((4-chlorophenyl)disulfanyl)-4-fluorotetrahydrofuran (C34).** Colorless viscous oil, (60.7 mg, 46%).  $^1\text{H}$  NMR (400 MHz,  $\text{CDCl}_3$ )  $\delta$  7.35 (q,  $J = 3.0$  Hz, 4H), 4.48-4.43 (m, 1H), 4.42-4.21 (m, 2H), 4.06-4.03 (m, 1H), 3.93-3.91 (m, 1H), 3.84-3.81 (m, 1H).  $^{13}\text{C}$  NMR (126 MHz,  $\text{CDCl}_3$ )  $\delta$  136.7, 131.1, 128.7 (d,  $J = 45.6$  Hz), 128.1 (d,  $J = 42.2$  Hz), 73.7, 70.4, 60.7, 53.6.  $^{19}\text{F}$  NMR (376 MHz,  $\text{CDCl}_3$ )  $\delta$  -220.6. HRMS calcd for  $\text{C}_{10}\text{H}_{11}\text{ClFOS}_2$   $\{[\text{M}+\text{H}]^+\}$ : 264.9924, found 264.9935.

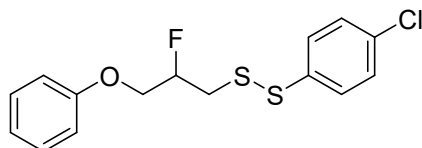

**1-(4-chlorophenyl)-2-(2-fluoro-3-phenoxypropyl)disulfane (C35).** Colorless viscous oil, (100.0 mg, 61%).  $^1\text{H}$  NMR (400 MHz,  $\text{CDCl}_3$ )  $\delta$  7.65-7.53 (m, 4H), 7.34-7.28 (m, 2H), 7.06-6.81 (m, 3H), 4.45-4.22 (m, 2H), 4.02-3.88 (m, 2H), 3.45-3.29 (m, 1H).  $^{13}\text{C}$  NMR (101 MHz,  $\text{CDCl}_3$ )  $\delta$  157.6 (d,  $J = 6.7$  Hz), 139.7, 139.0, 138.2, 129.7 (dd,  $J = 10.9, 5.1$  Hz), 126.3 (d,  $J = 10.0$  Hz), 121.8 (d,  $J = 9.9$  Hz), 114.6 (d,  $J = 6.2$  Hz), 66.1 (d,  $J = 66.8$  Hz), 62.4 (d,  $J = 81.7$  Hz), 38.7 (d,  $J = 21.3$  Hz).  $^{19}\text{F}$  NMR (376 MHz,  $\text{CDCl}_3$ )  $\delta$  -220.5. HRMS calcd for  $\text{C}_{15}\text{H}_{15}\text{ClFOS}_2$   $\{[\text{M}+\text{H}]^+\}$ : 329.0237, found 329.0231.

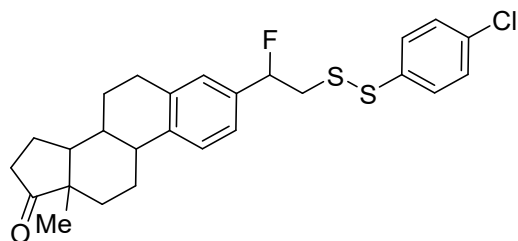

**3-(2-((4-chlorophenyl)disulfanyl)-1-fluoroethyl)-13-methyl-6,7,8,9,11,12,13,14,15,16-decahydro-17H-cyclopenta[a]phenanthren-17-one (C36).** White solid (106.7 mg, 45%). Mp: 116-1118°C.  $^1\text{H}$  NMR (400 MHz,  $\text{CDCl}_3$ )  $\delta$  7.62-7.59 (m, 2H), 7.55-7.49 (m, 2H), 7.29-7.24 (m, 2H), 7.17 (d,  $J = 7.7$  Hz, 1H), 5.41-5.10 (m, 1H), 3.43-3.24 (m, 2H), 2.96-2.89 (m, 2H), 2.53 (d,  $J = 10.2$  Hz, 1H), 2.42 (d,  $J = 10.1$  Hz, 1H), 2.30 (d,  $J = 10.1$  Hz, 1H), 2.19-1.98 (m, 4H), 1.66-1.46 (m, 6H), 0.93 (d,  $J = 8.0$  Hz, 3H).  $^{13}\text{C}$  NMR (101 MHz,  $\text{CDCl}_3$ )  $\delta$  141.9 (d,  $J = 15.3$  Hz), 141.0, 137.5 (d,  $J = 16.4$  Hz), 136.4, 129.8, 129.7, 127.5, 126.1, 125.6, 125.3, 124.4, 67.5 (d,  $J = 9.0$  Hz), 55.8, 50.5, 44.4, 38.0, 35.8, 31.6, 29.3, 26.3, 25.6, 21.6, 13.8.  $^{19}\text{F}$  NMR (376 MHz,  $\text{CDCl}_3$ )  $\delta$  -220.6. HRMS calcd for  $\text{C}_{26}\text{H}_{29}\text{ClFOS}_2$   $\{[\text{M}+\text{H}]^+\}$ : 475.1332, found 475.1261.

## 8. Compound data

C1

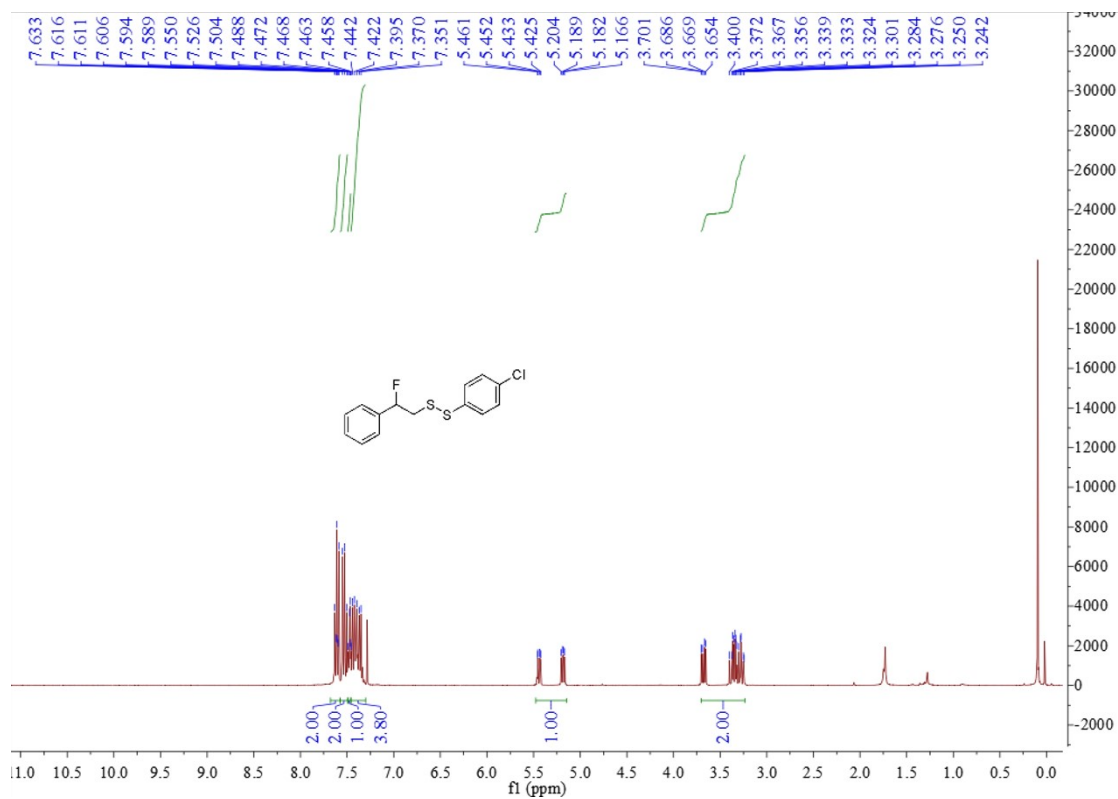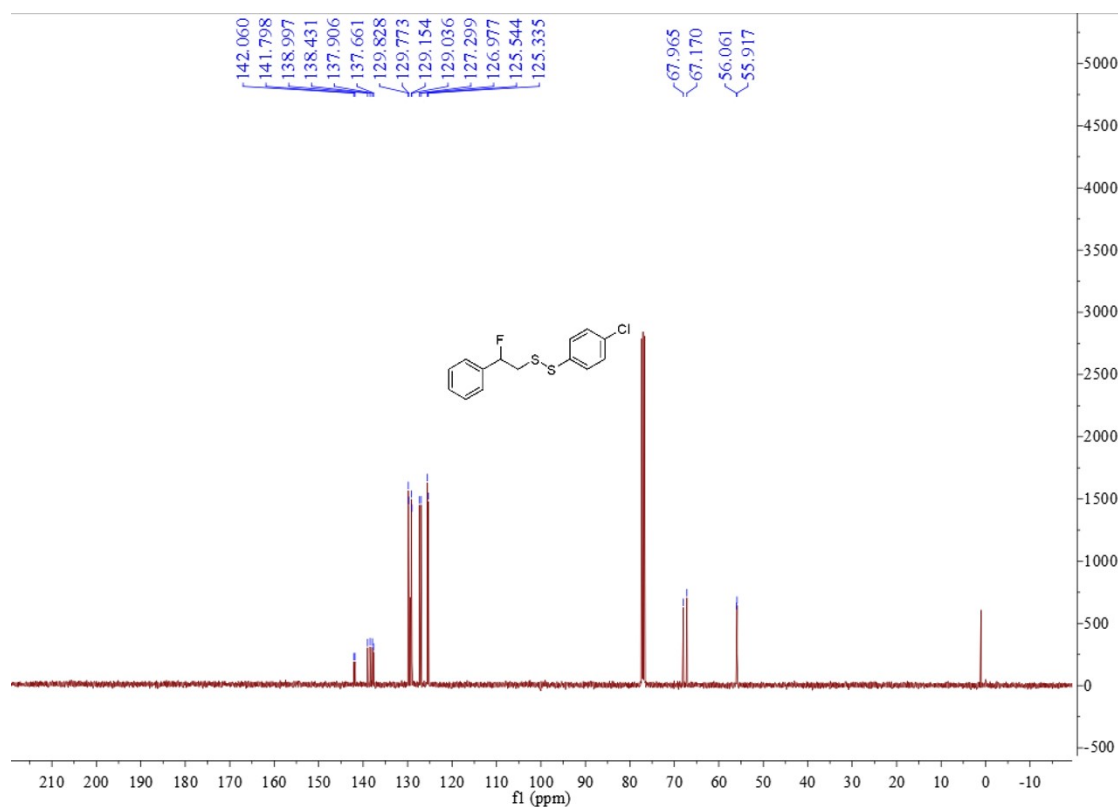

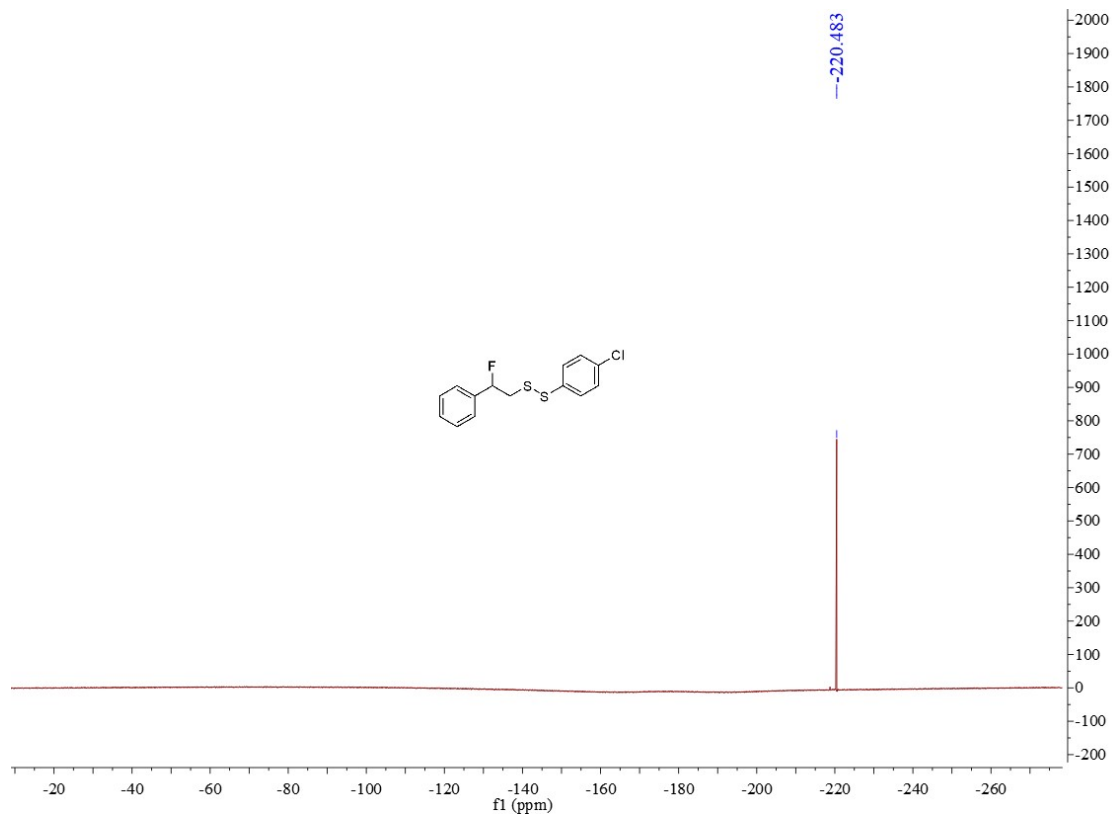

C2

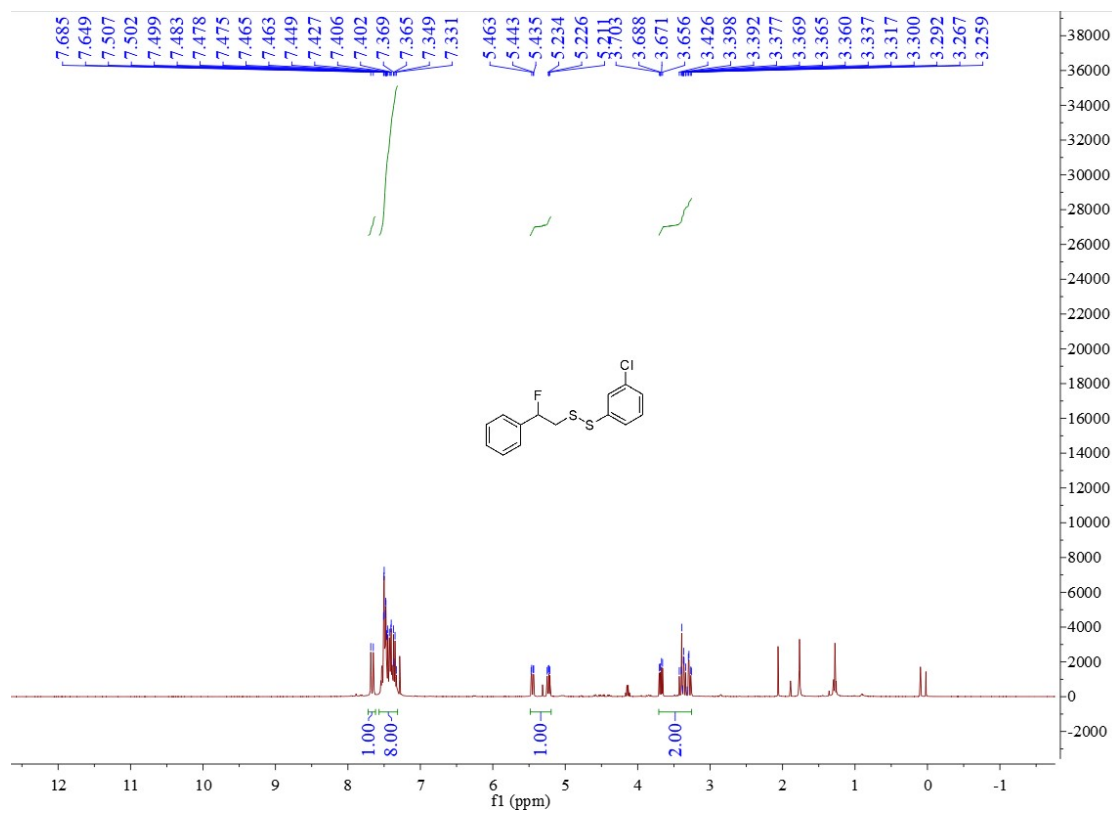

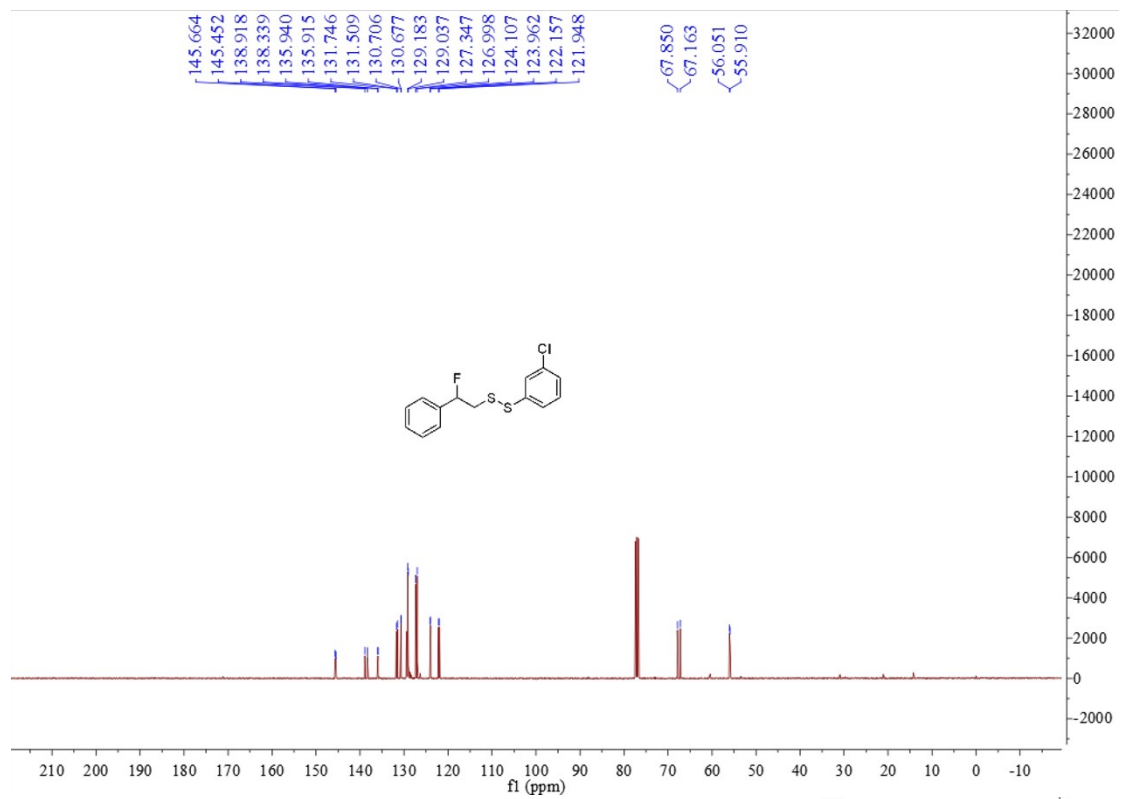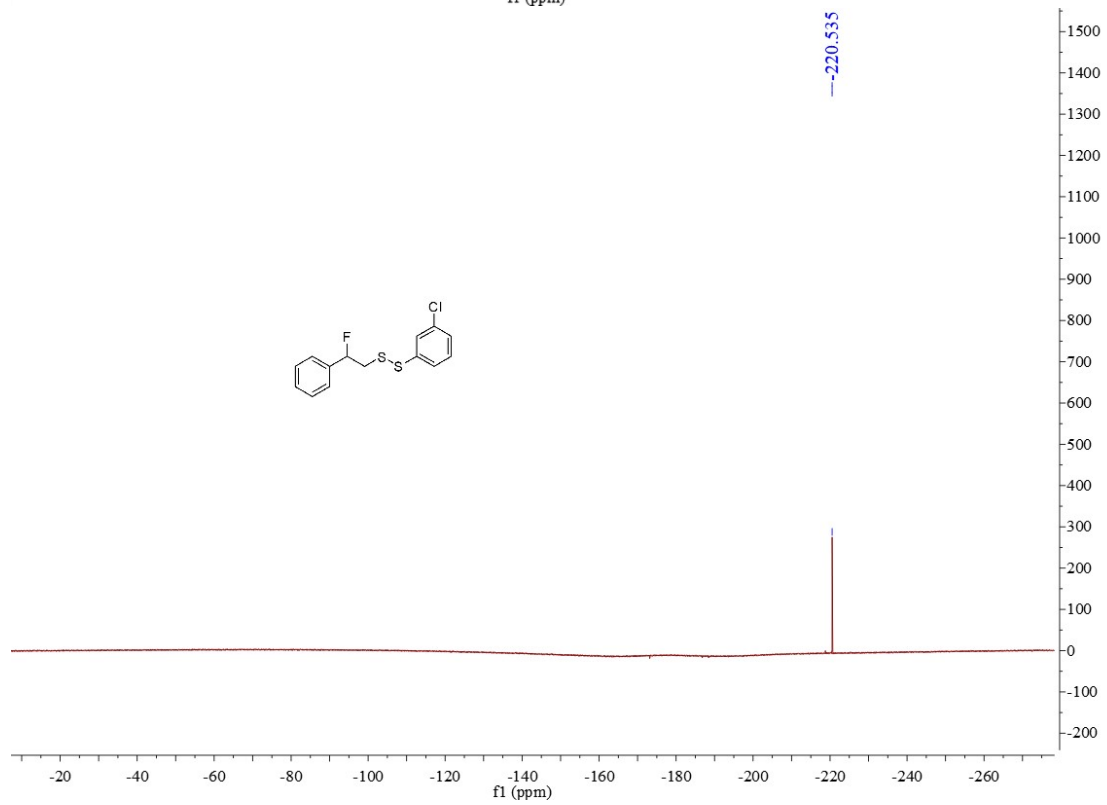

C3

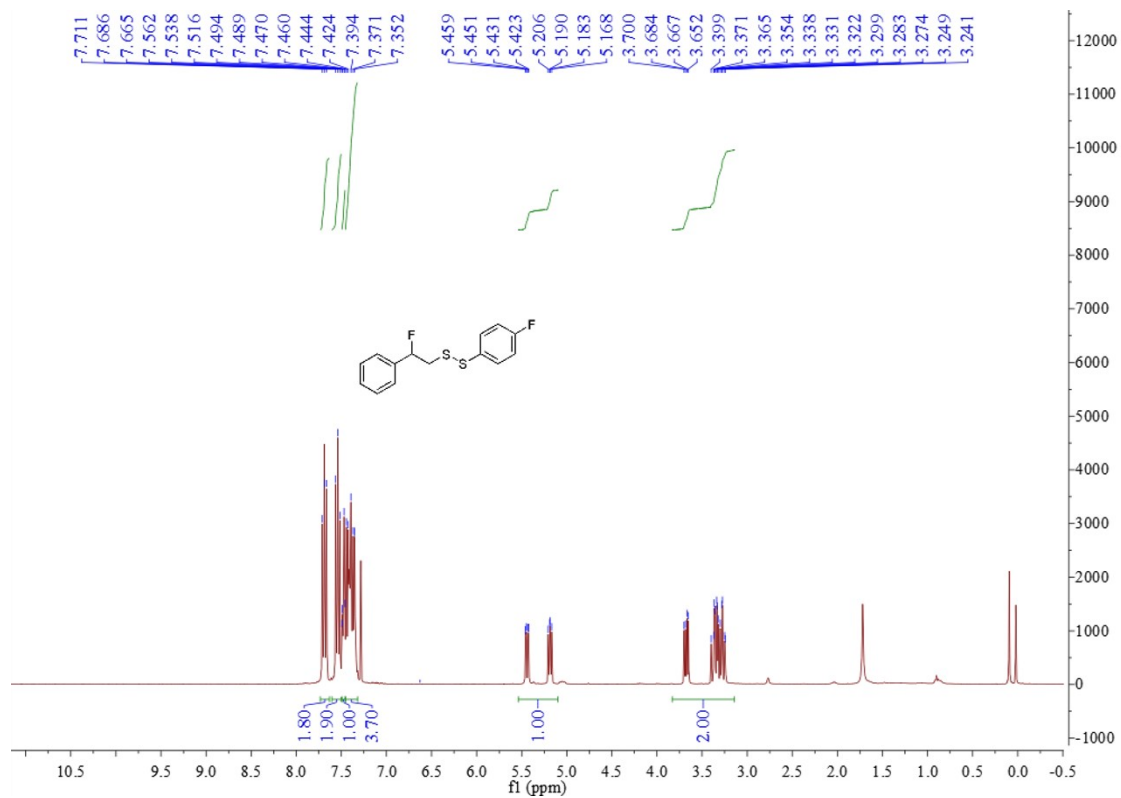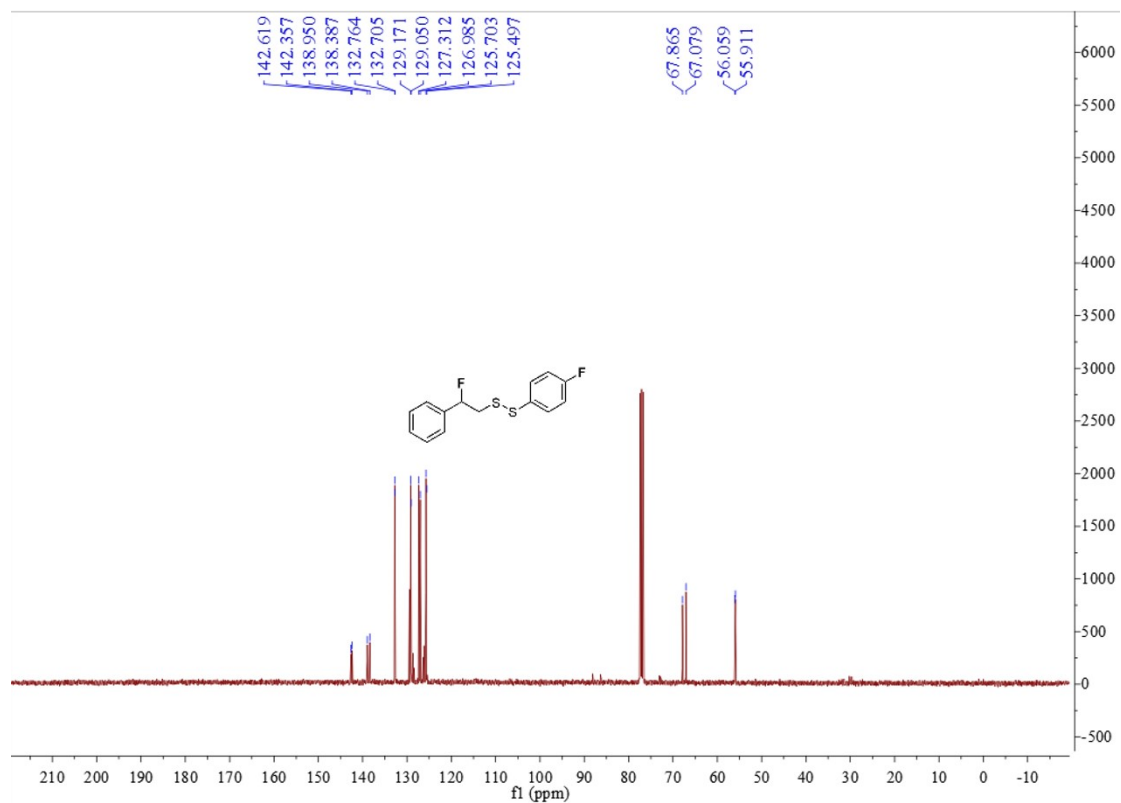

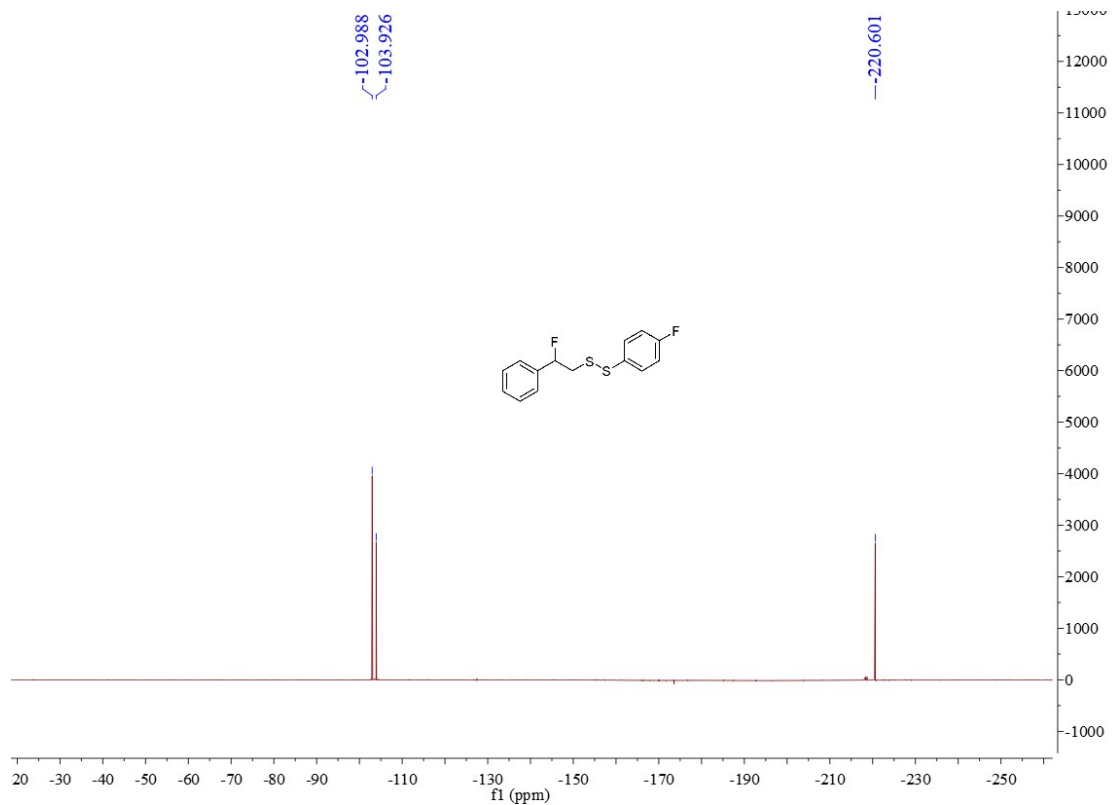

C4

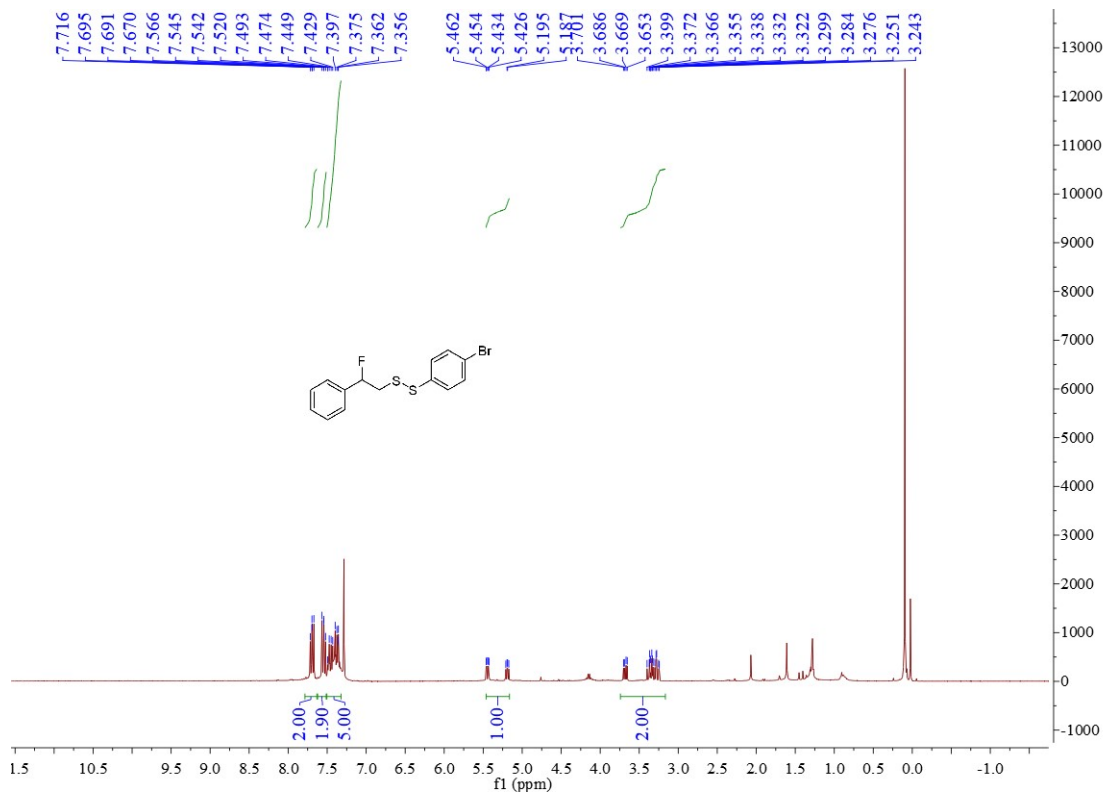



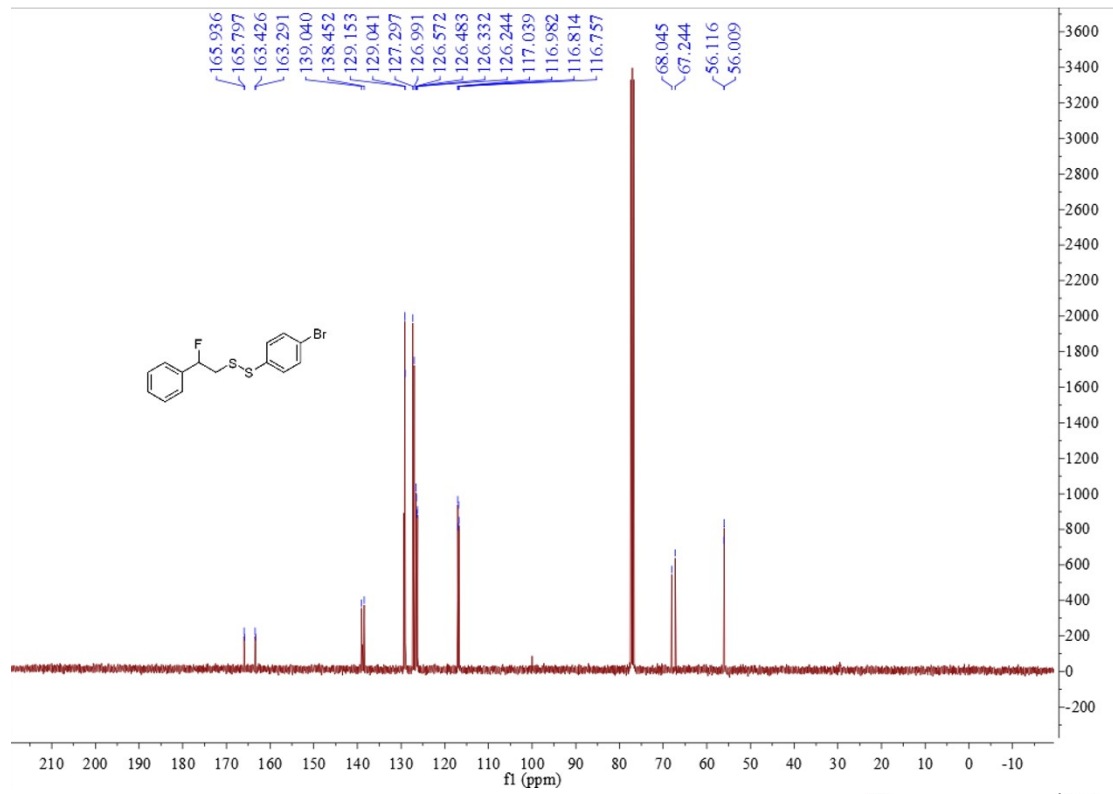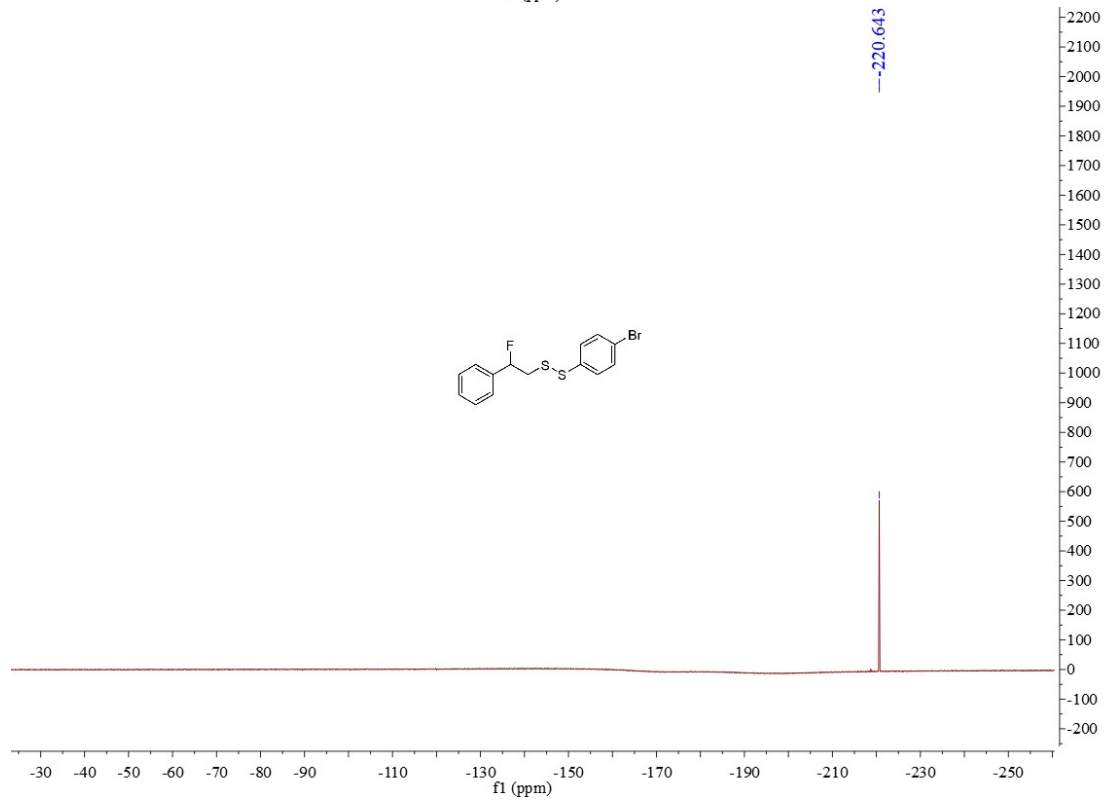

C5

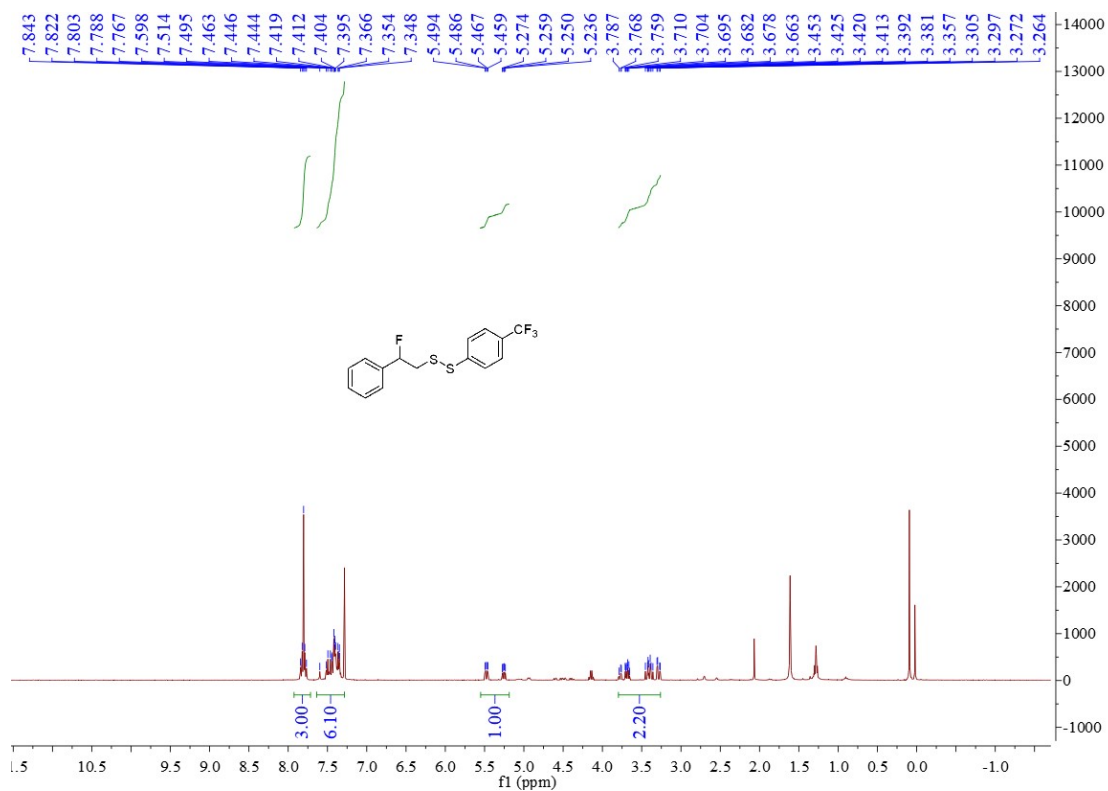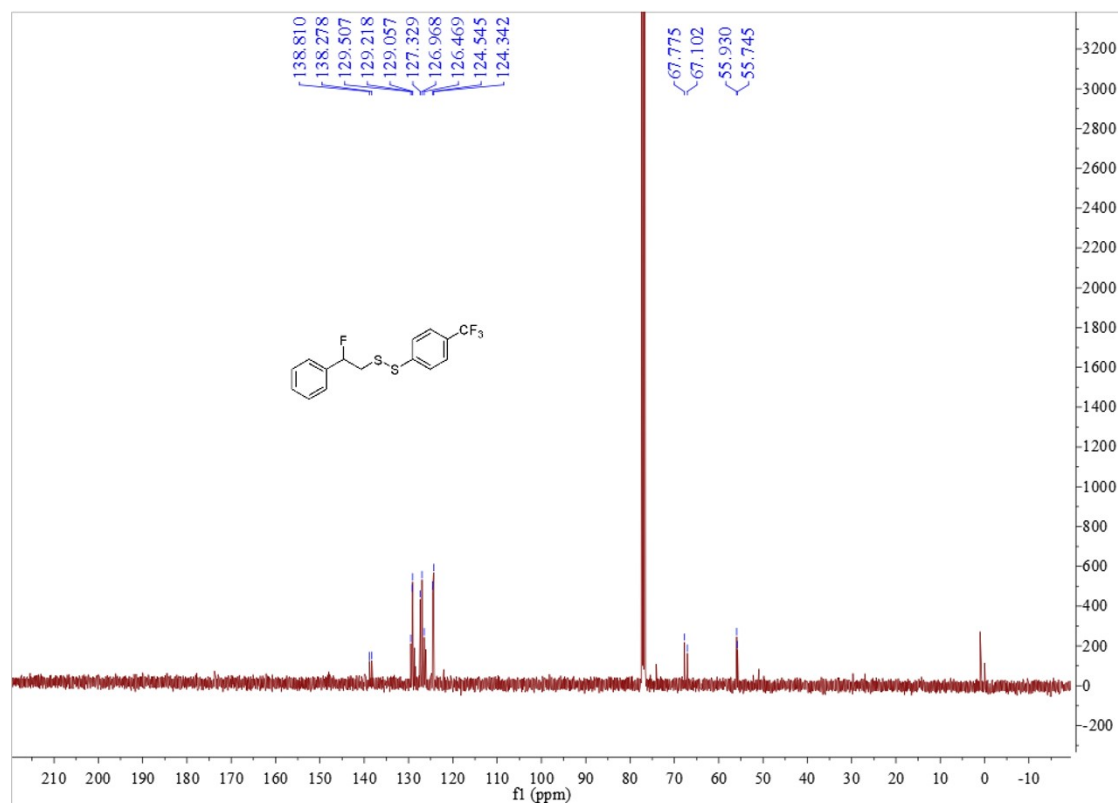

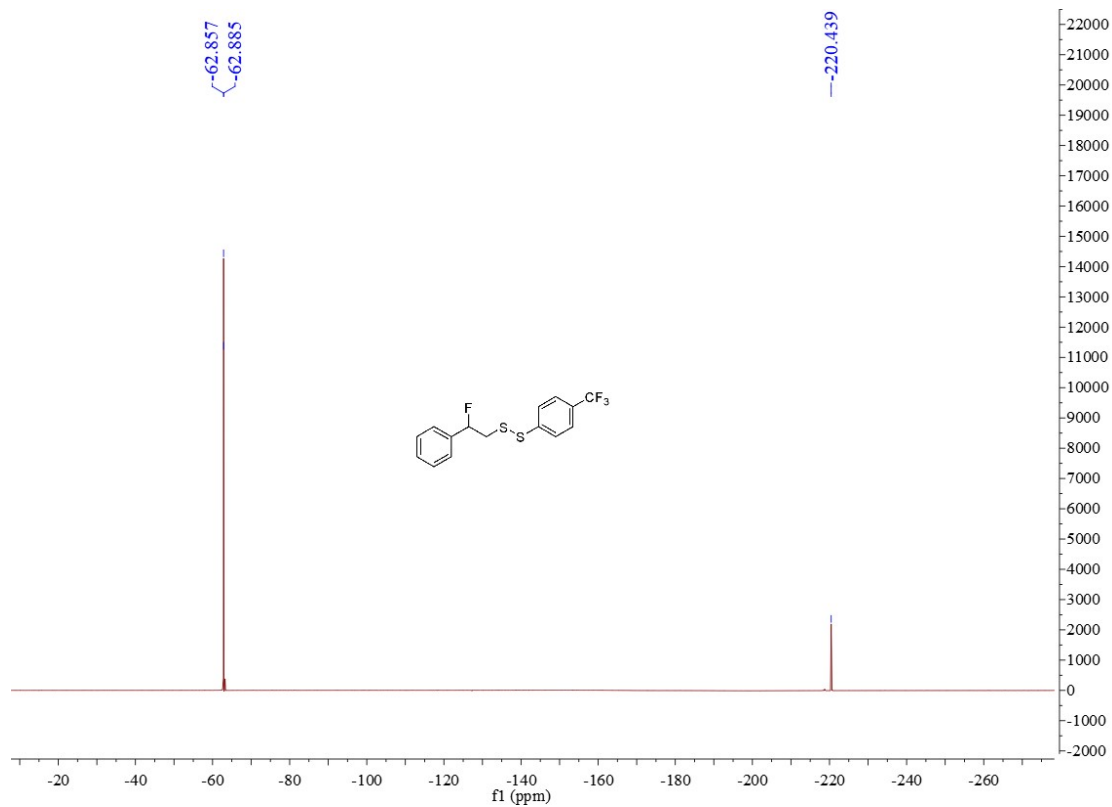

C6

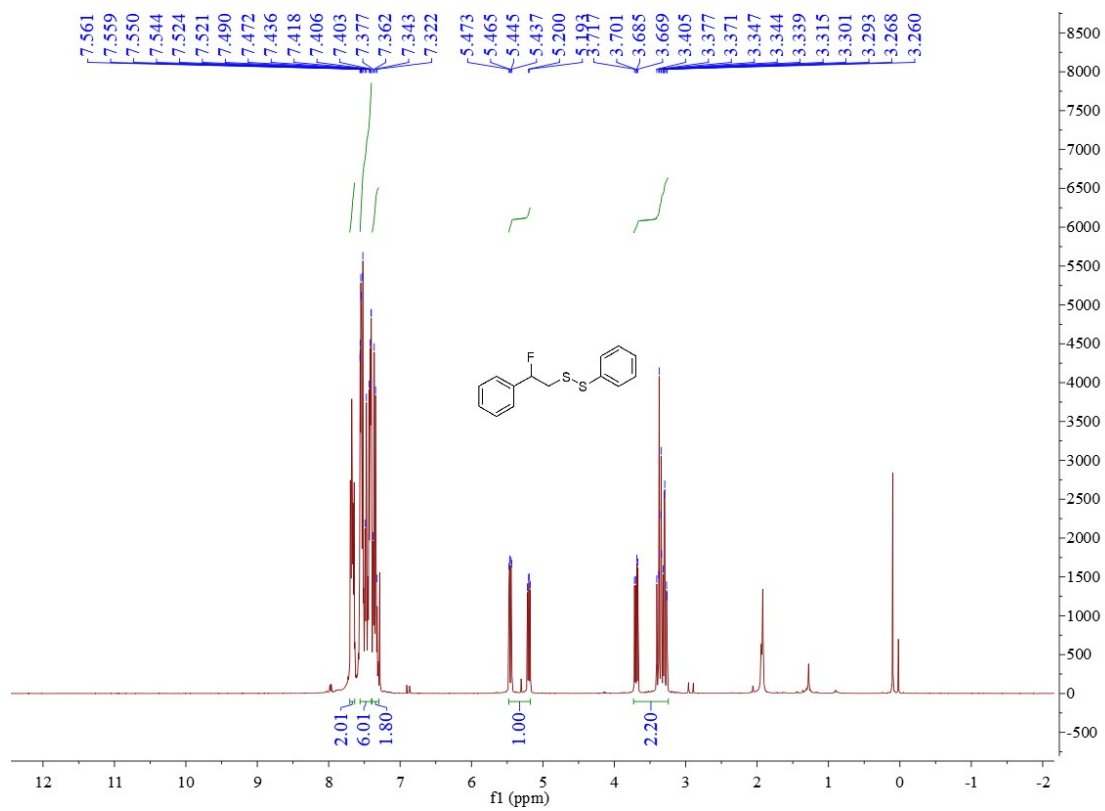

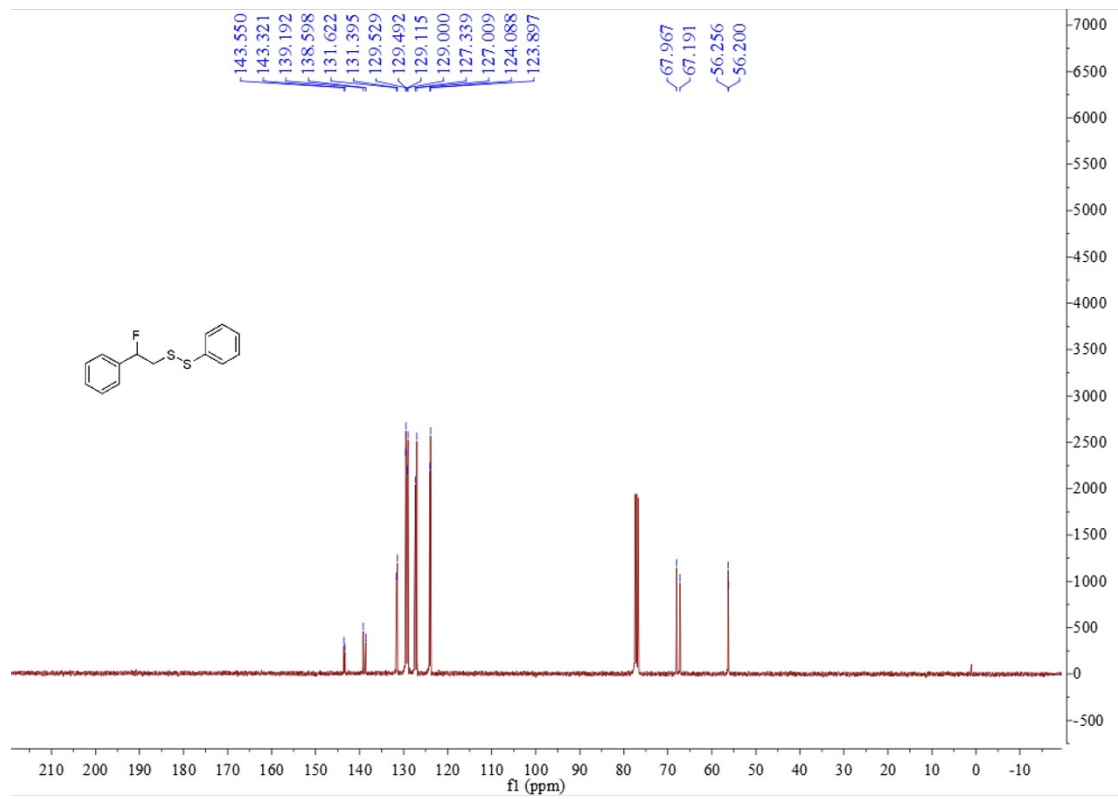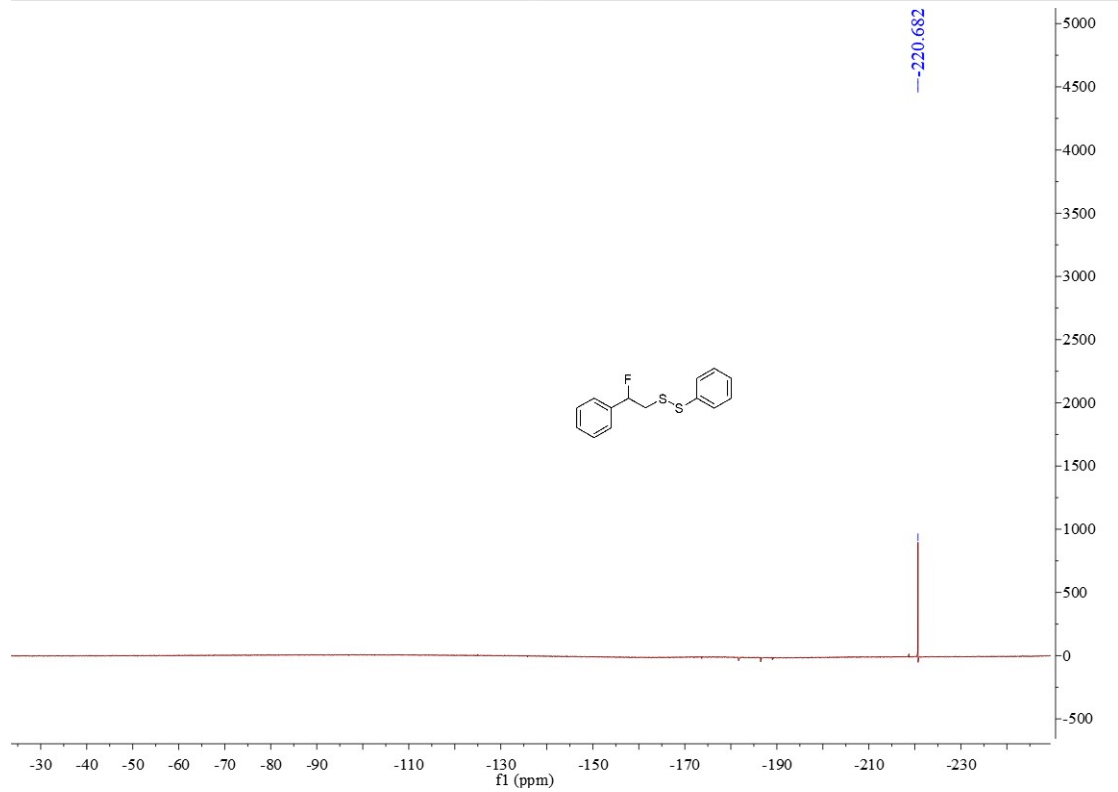

C7

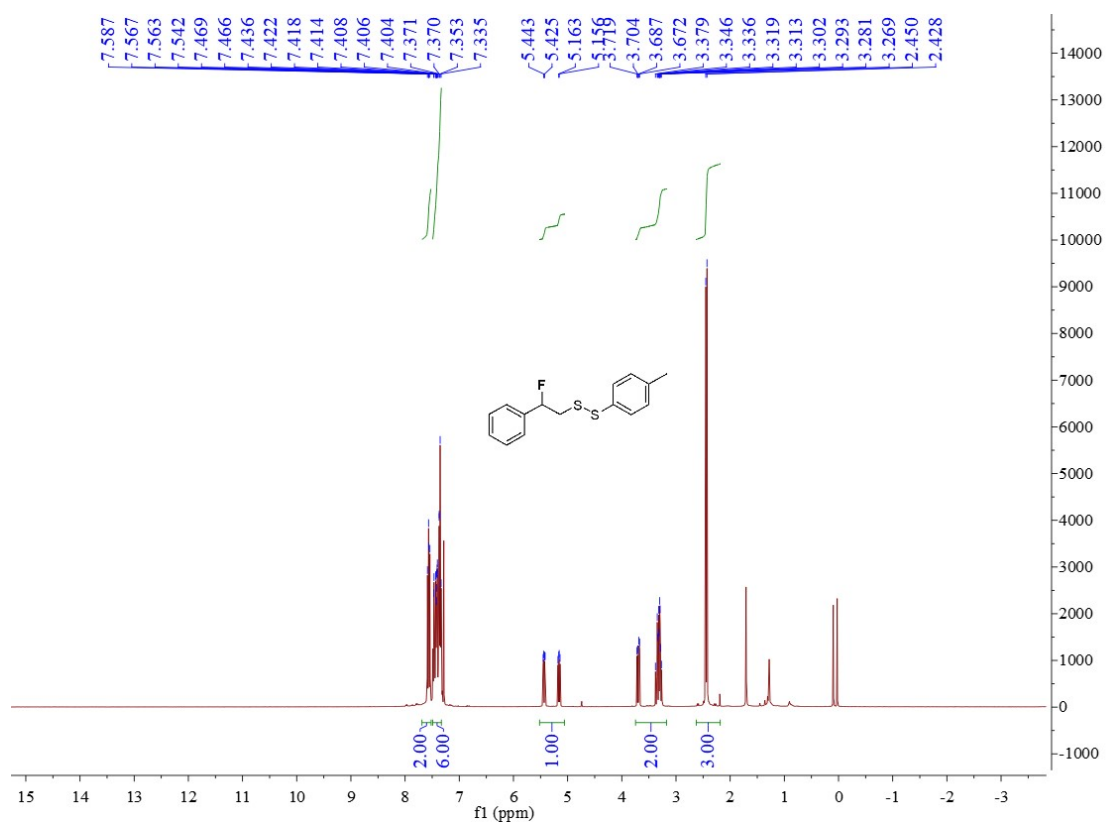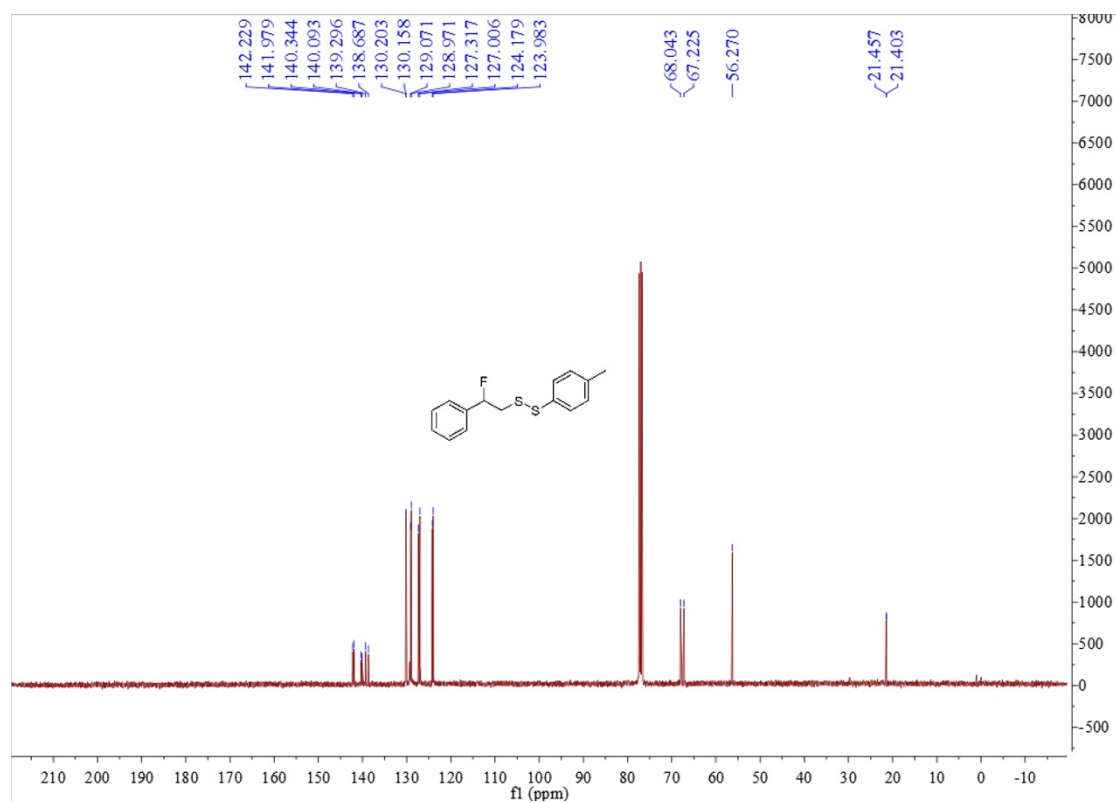

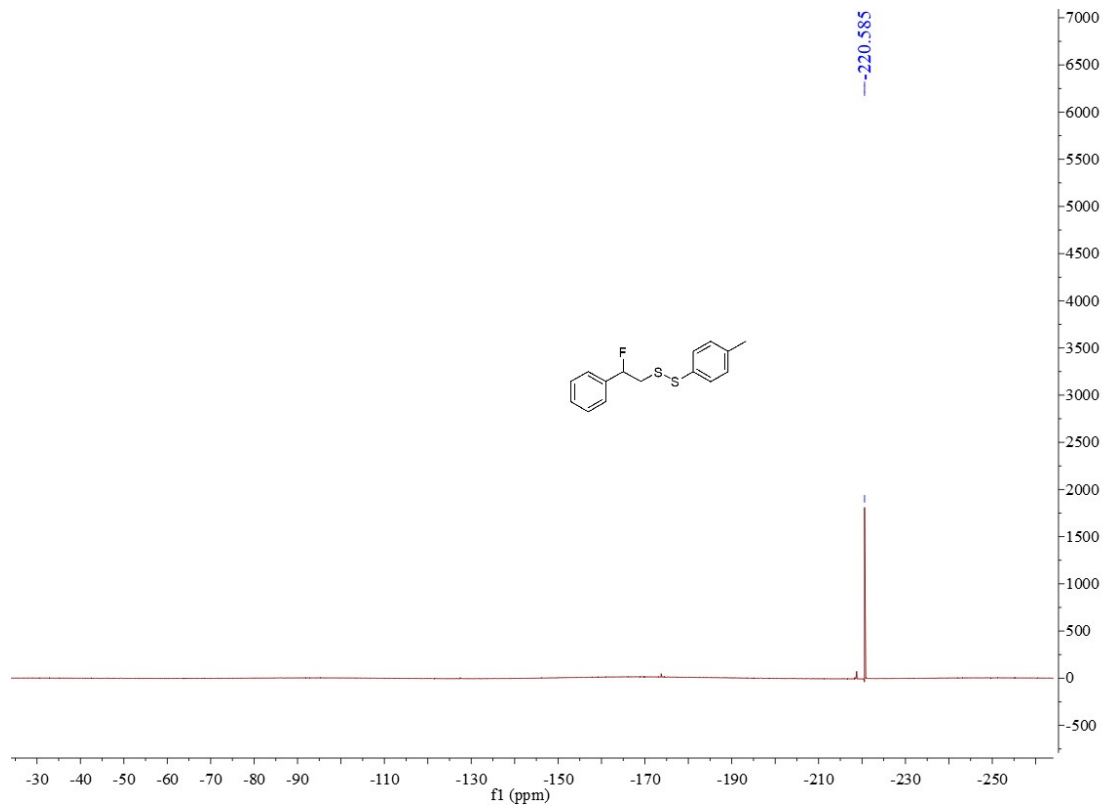

C8

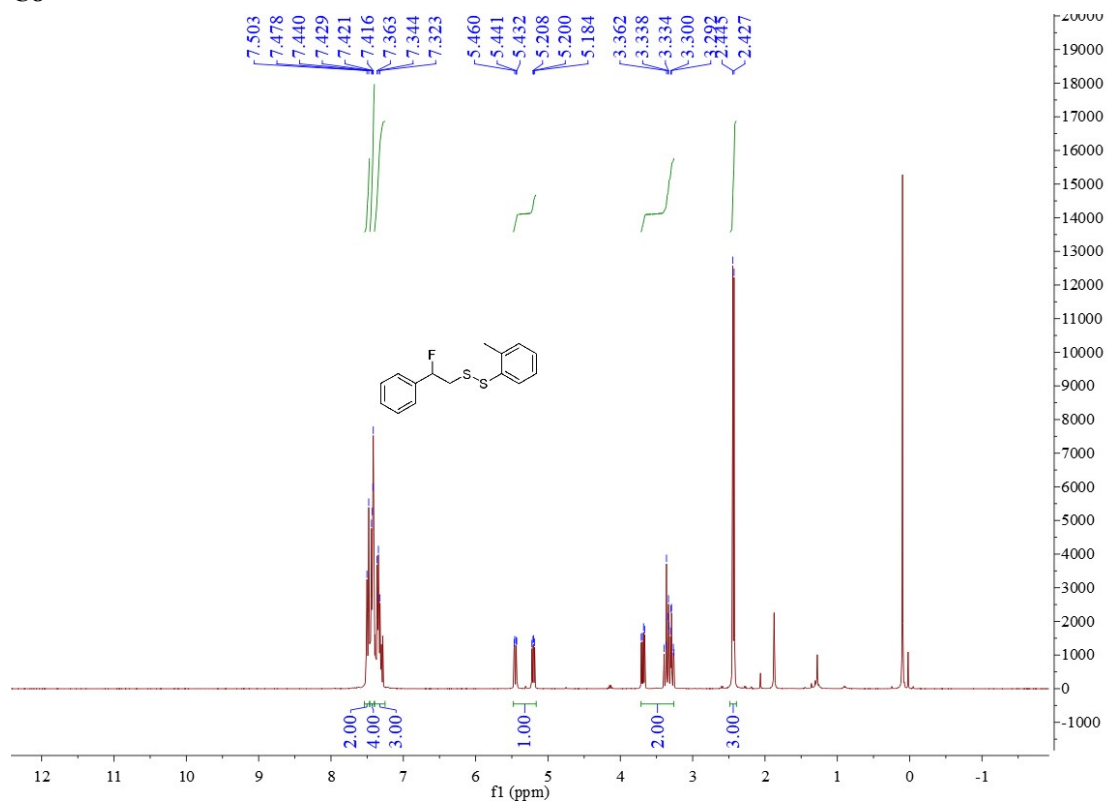

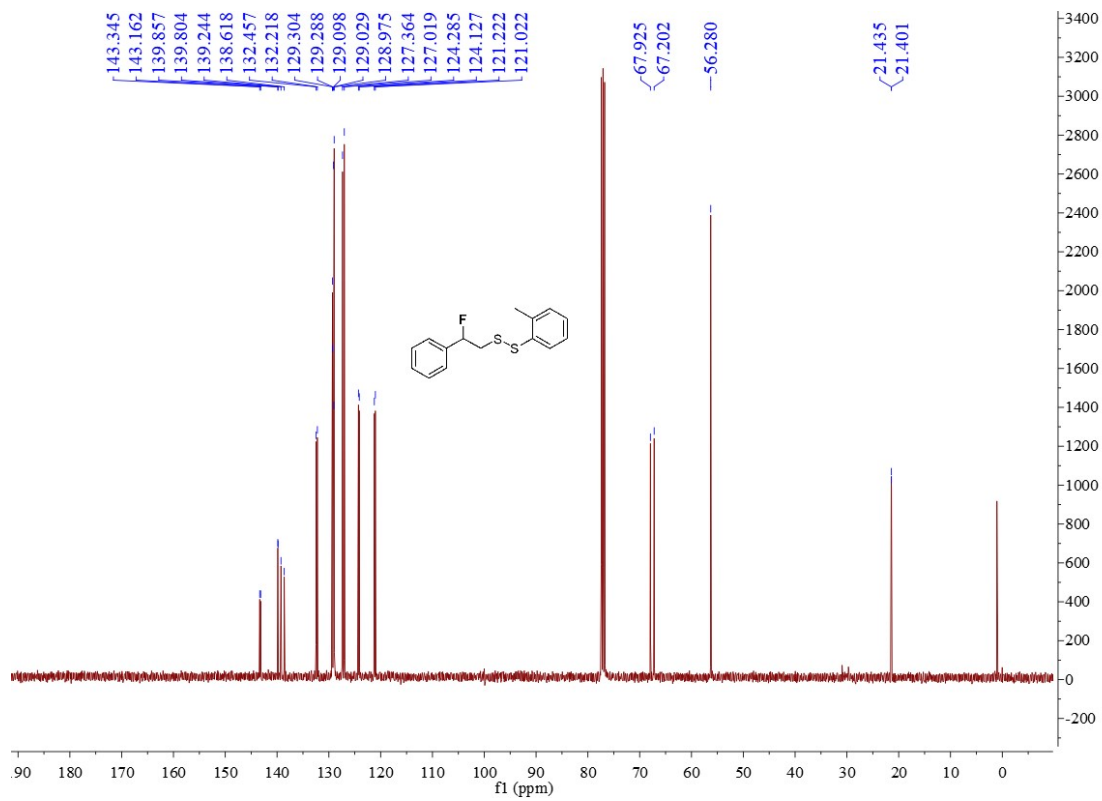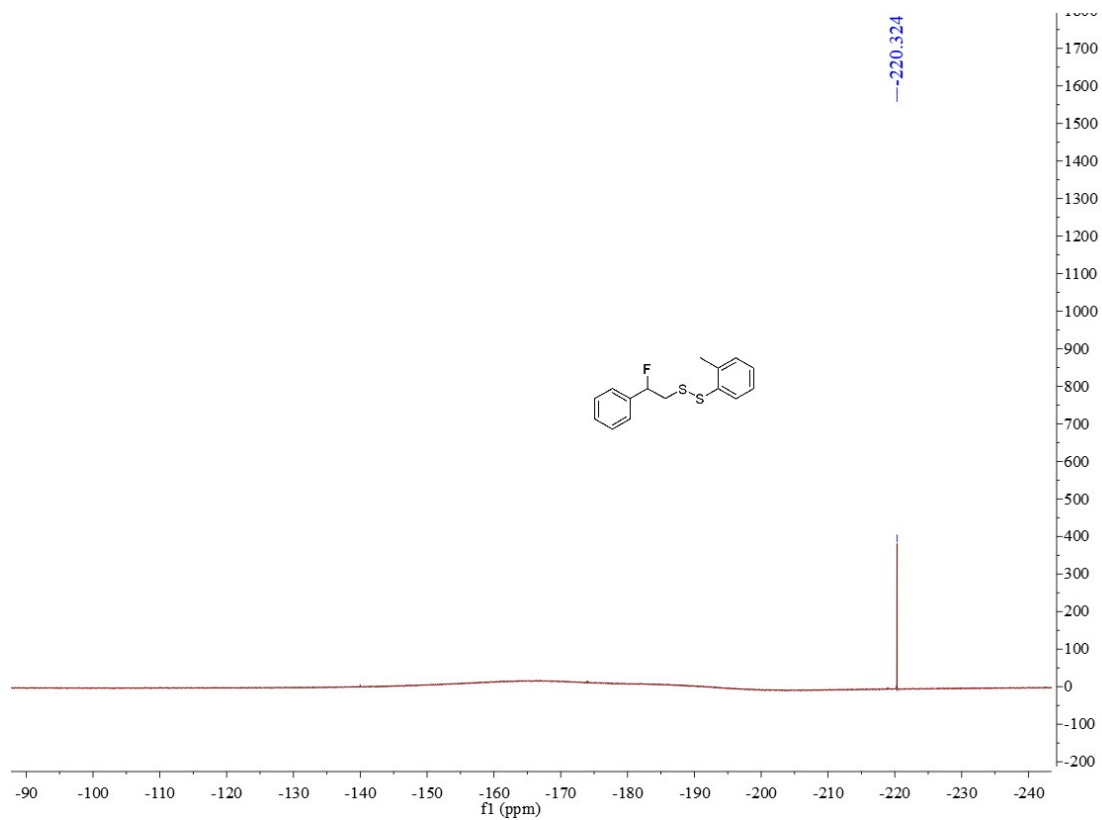

C9

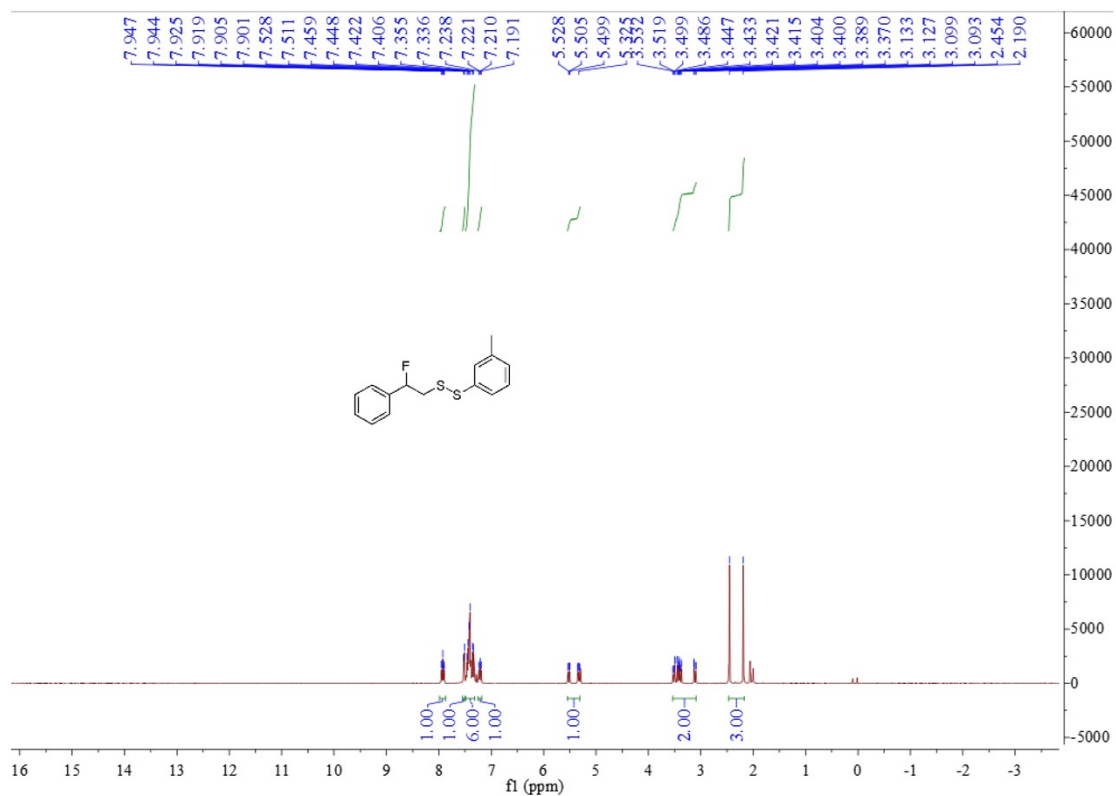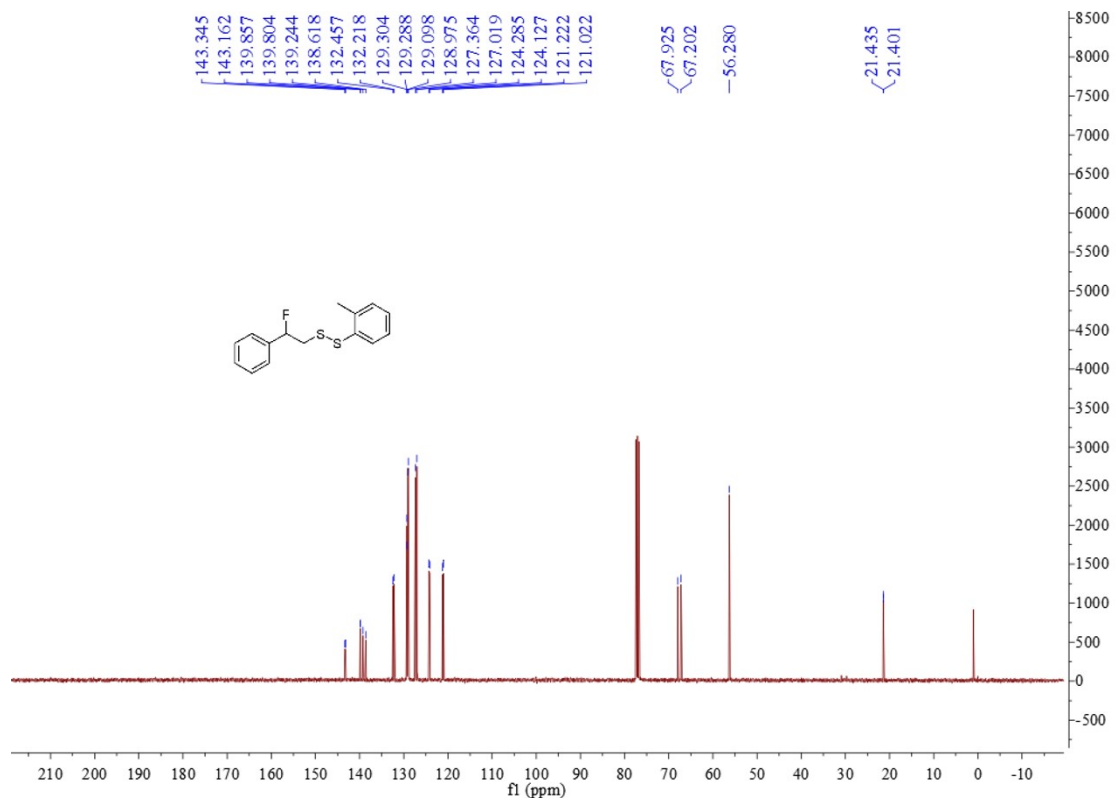



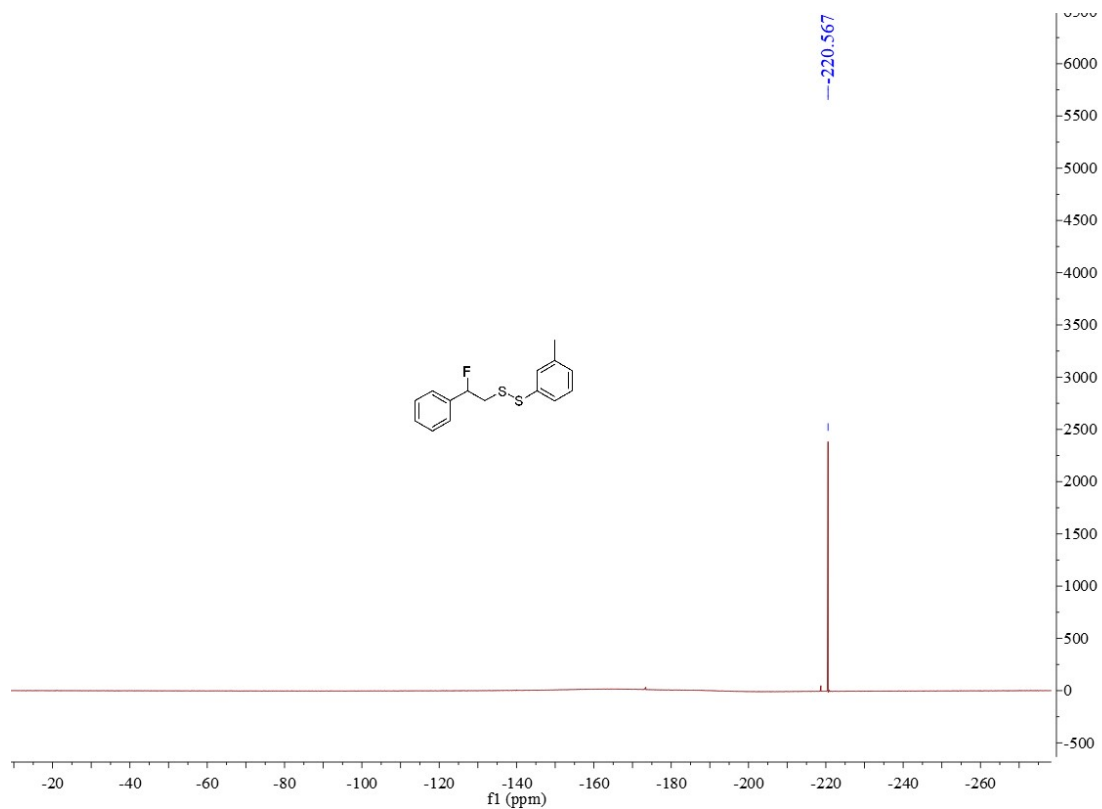

C10

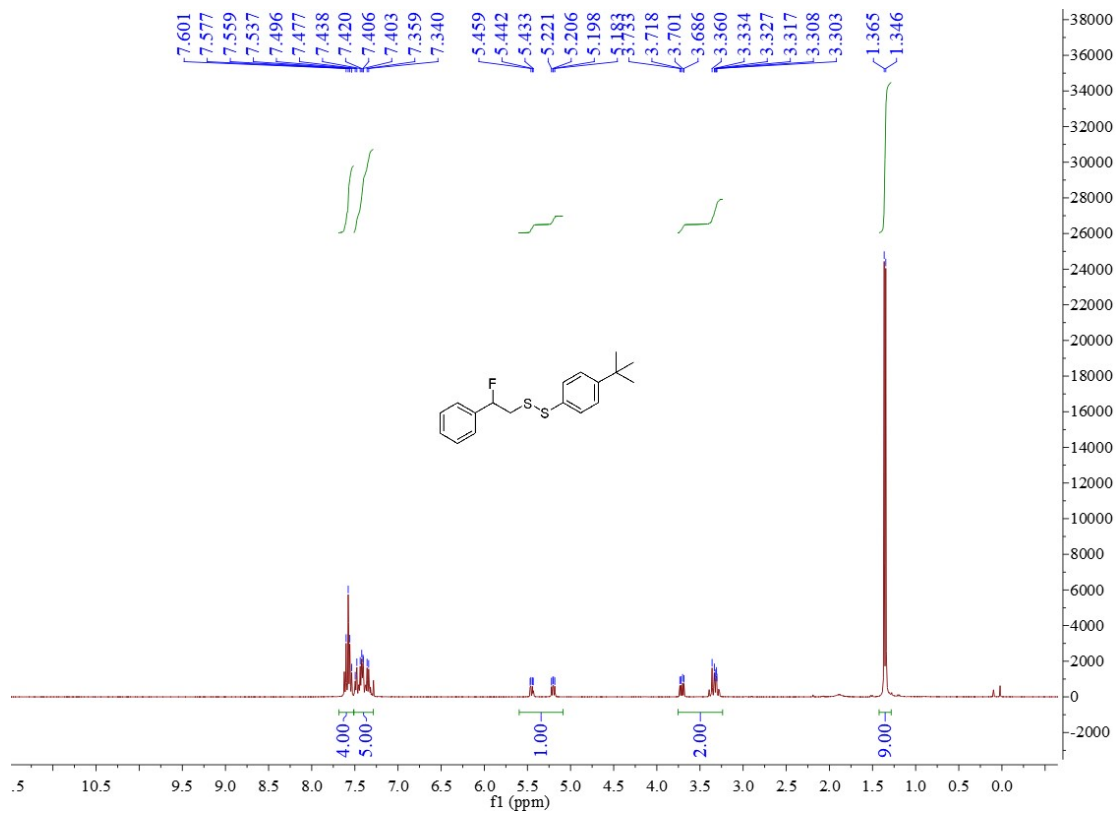

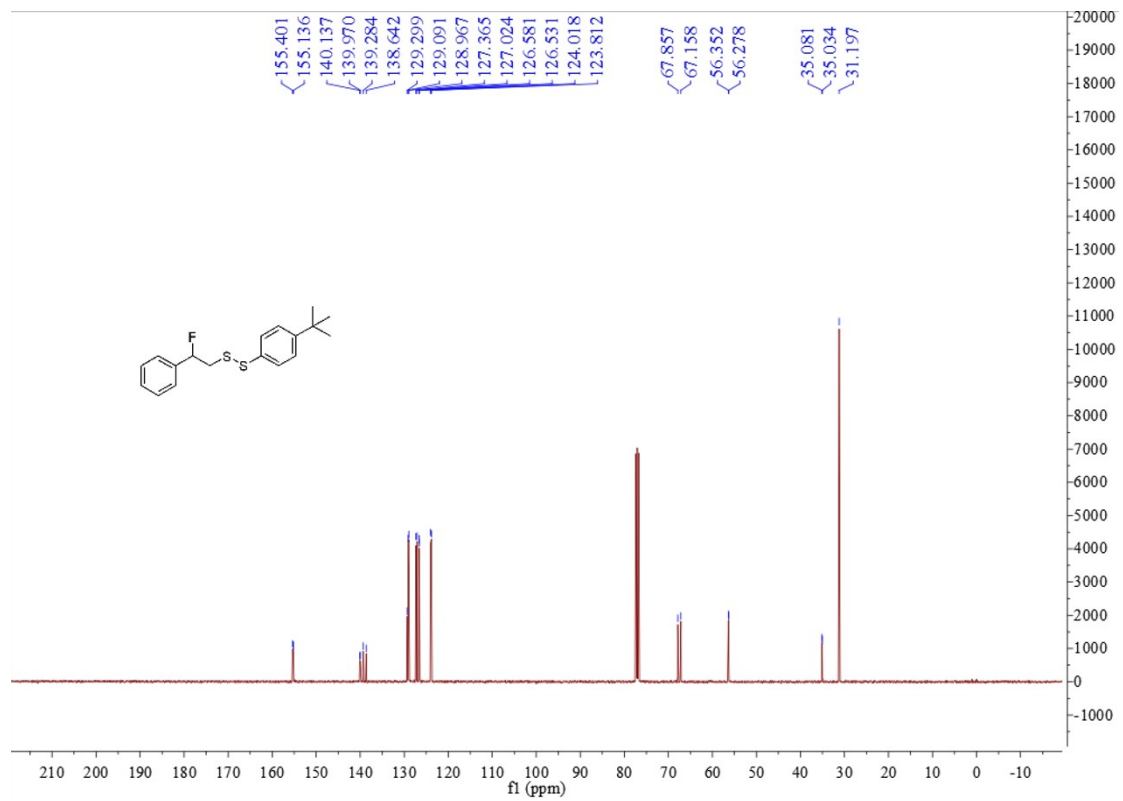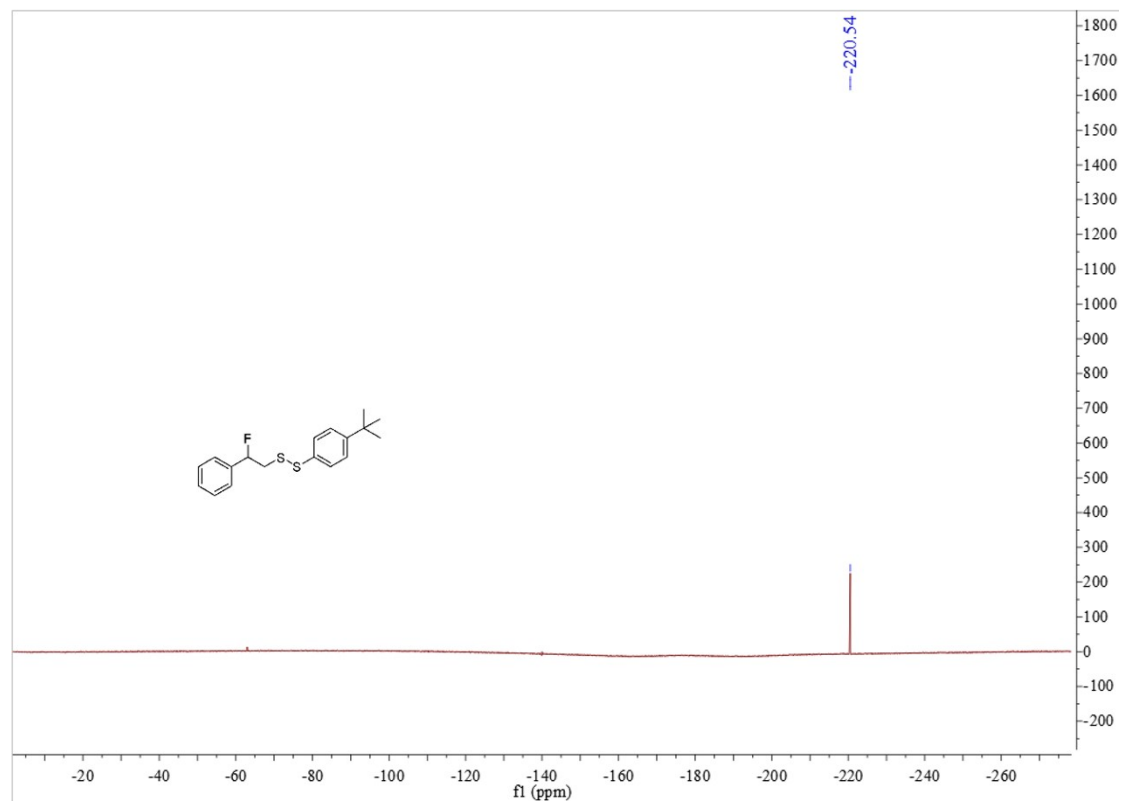

C11

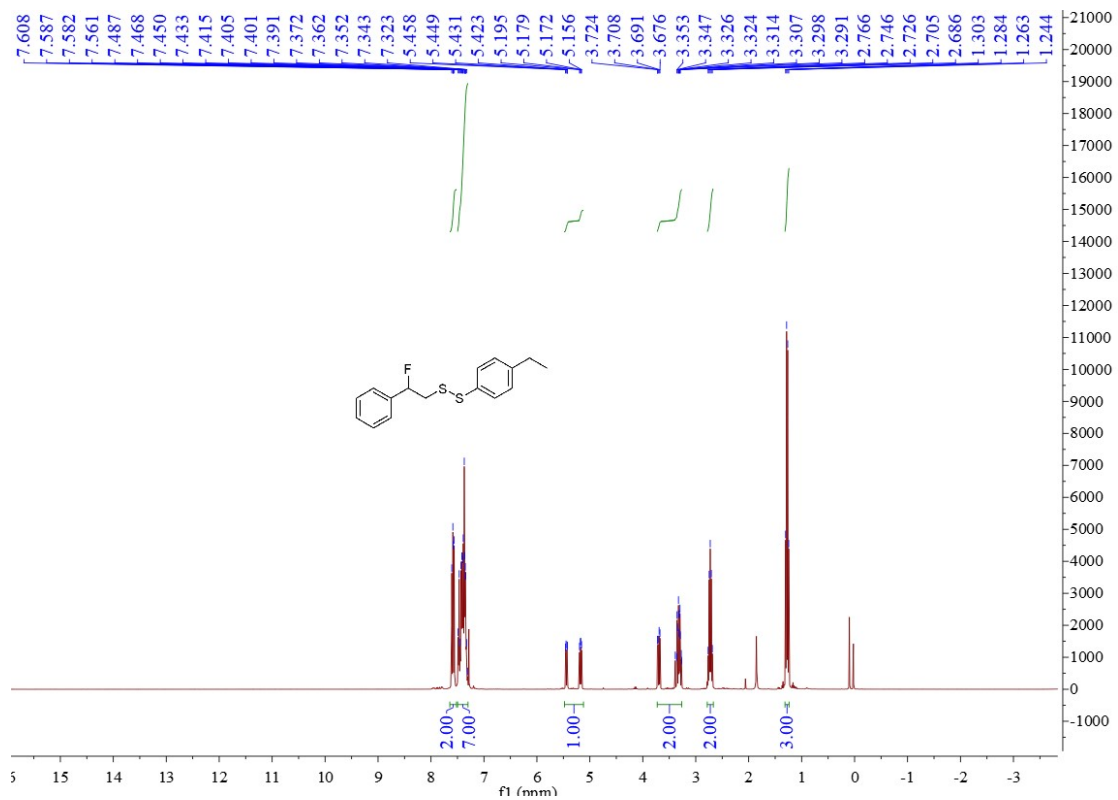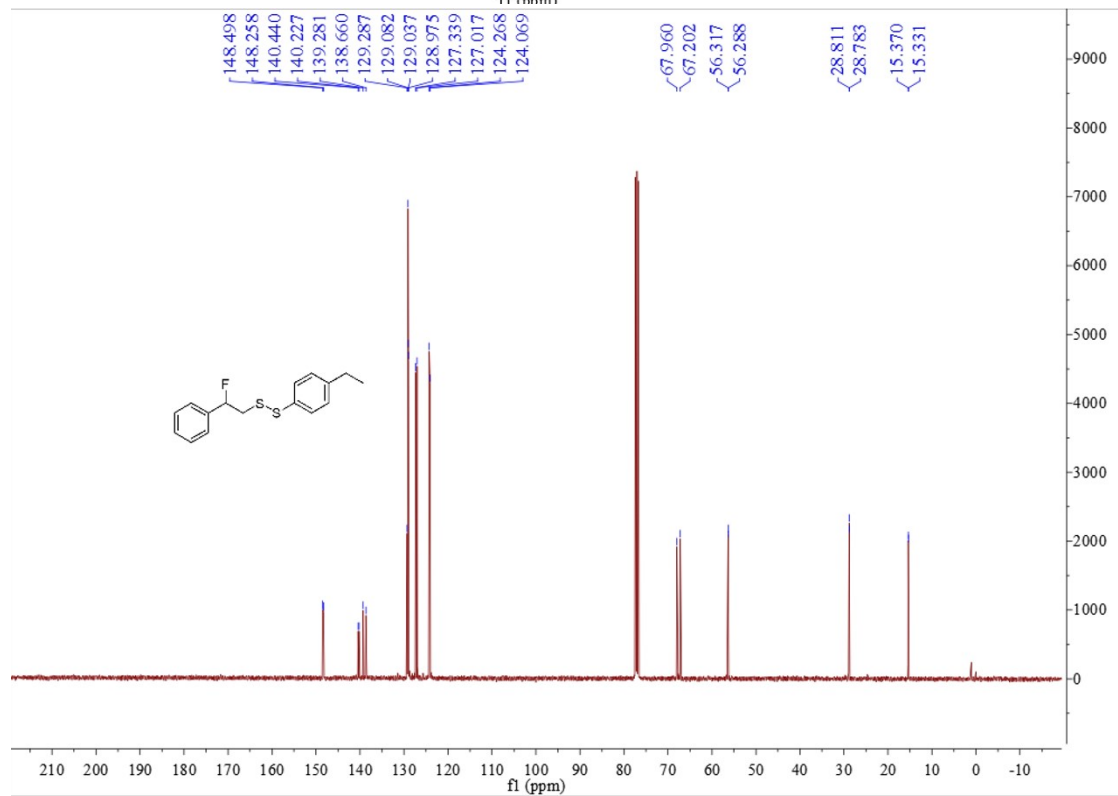

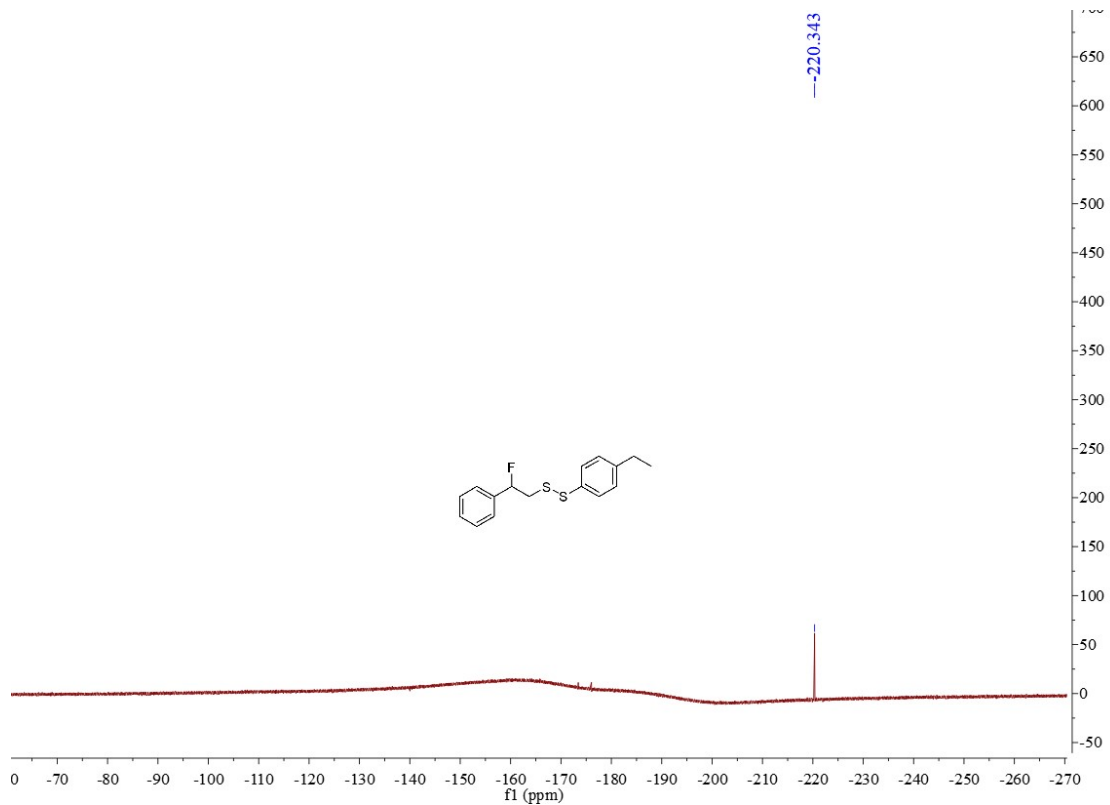

**C12**

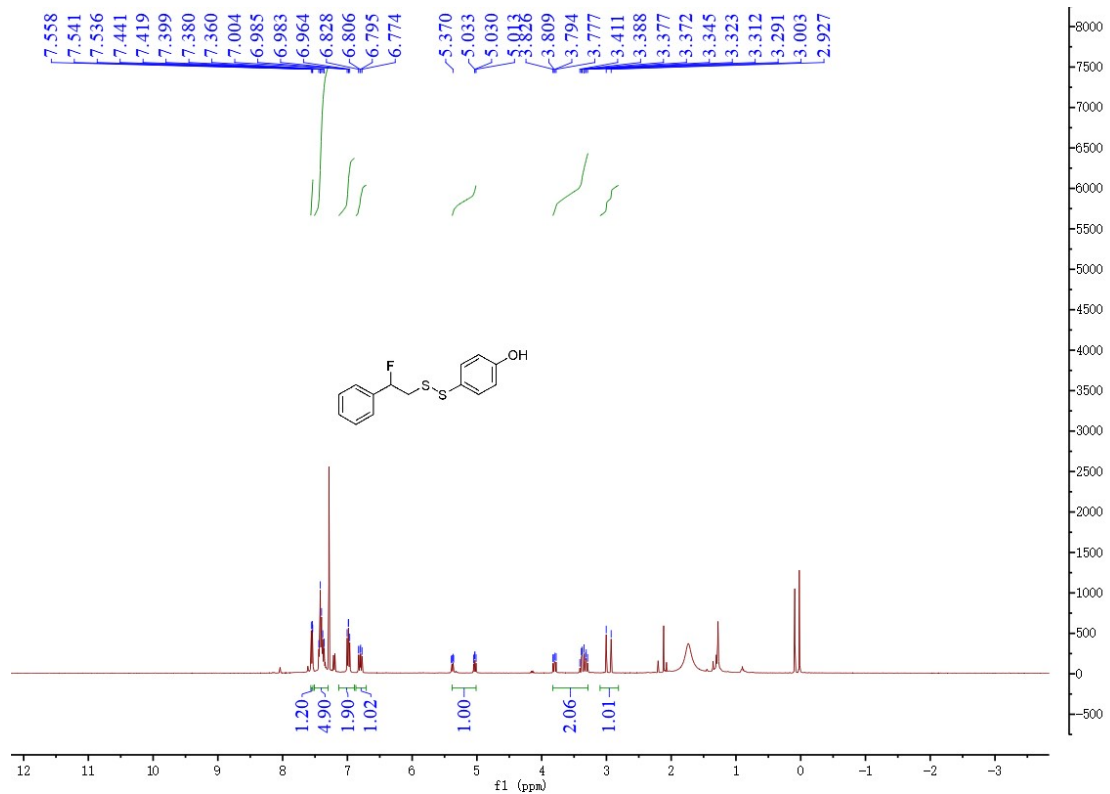

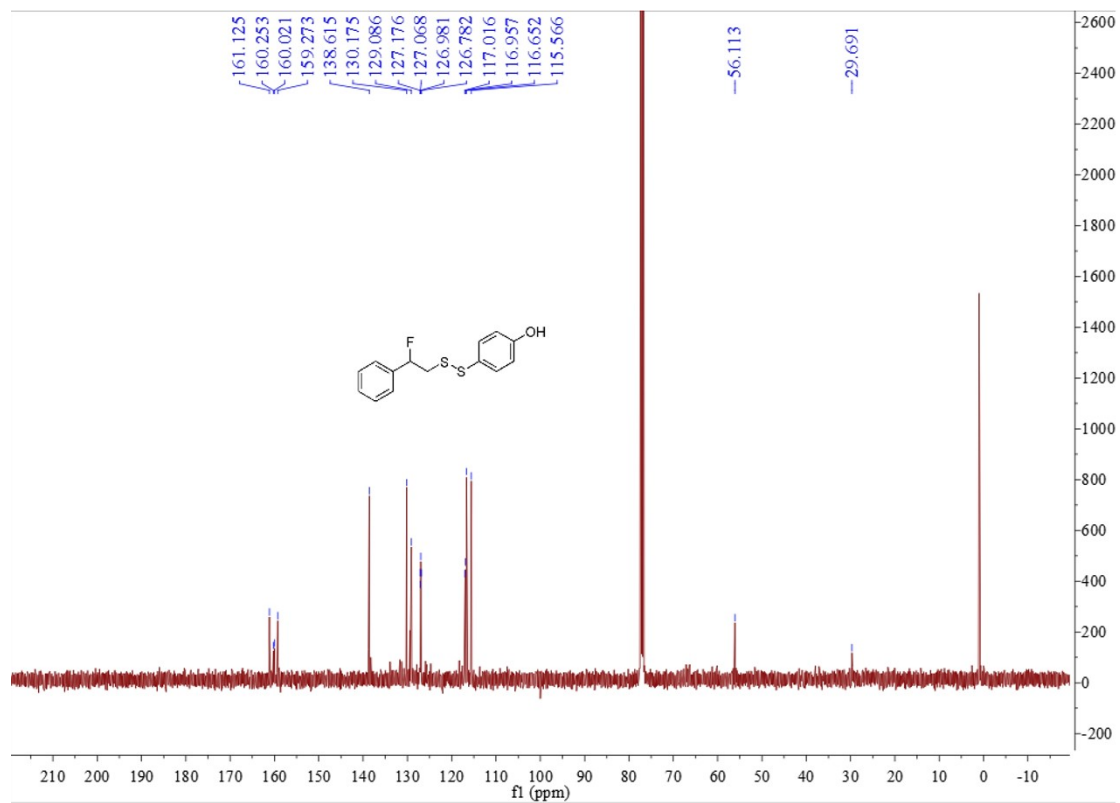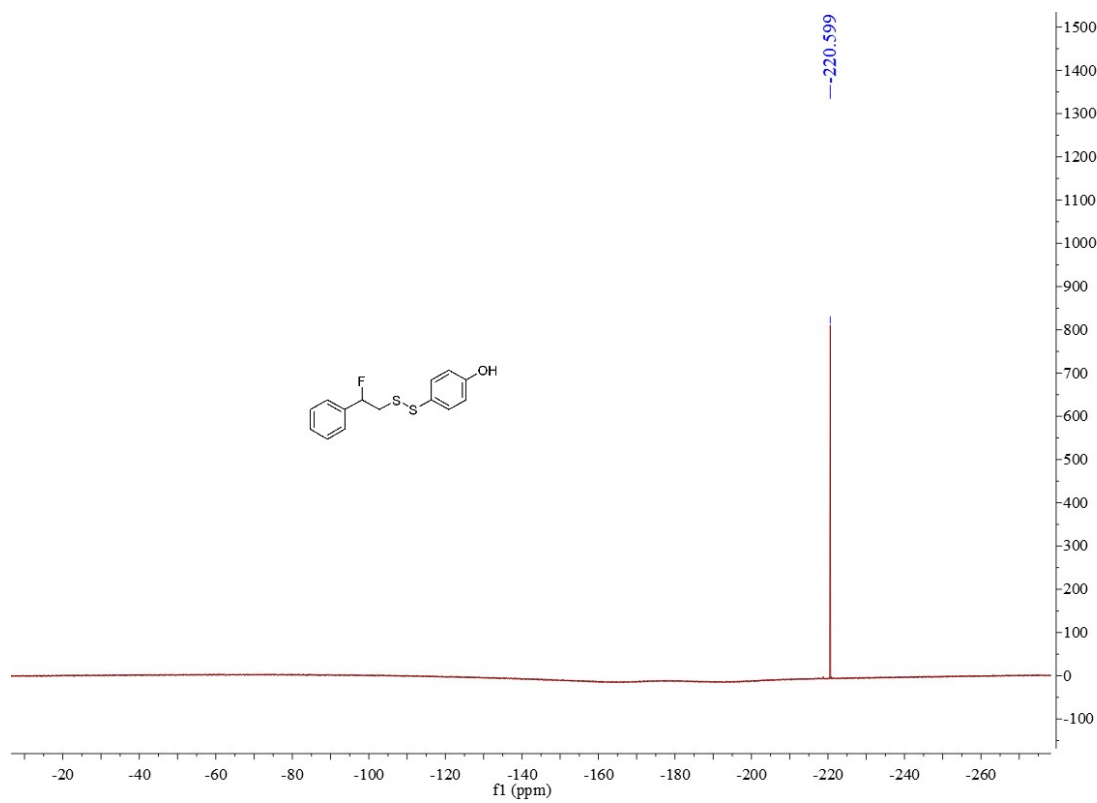

C13

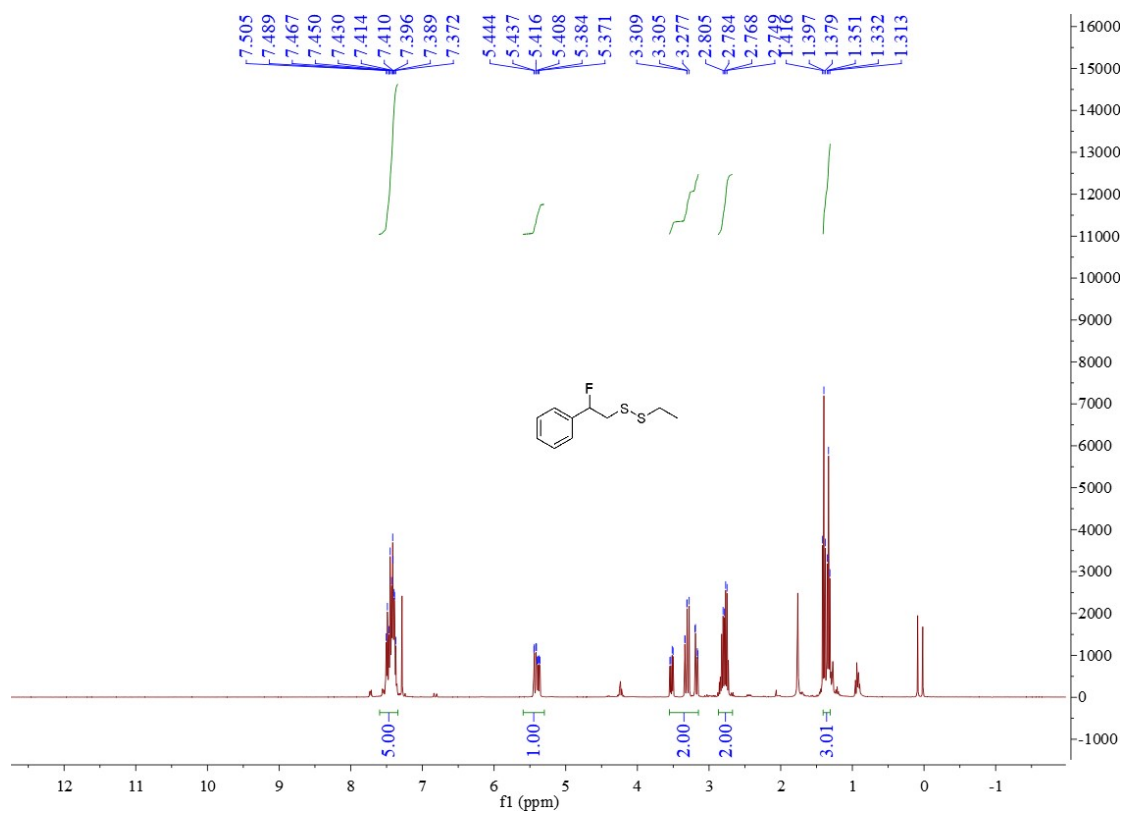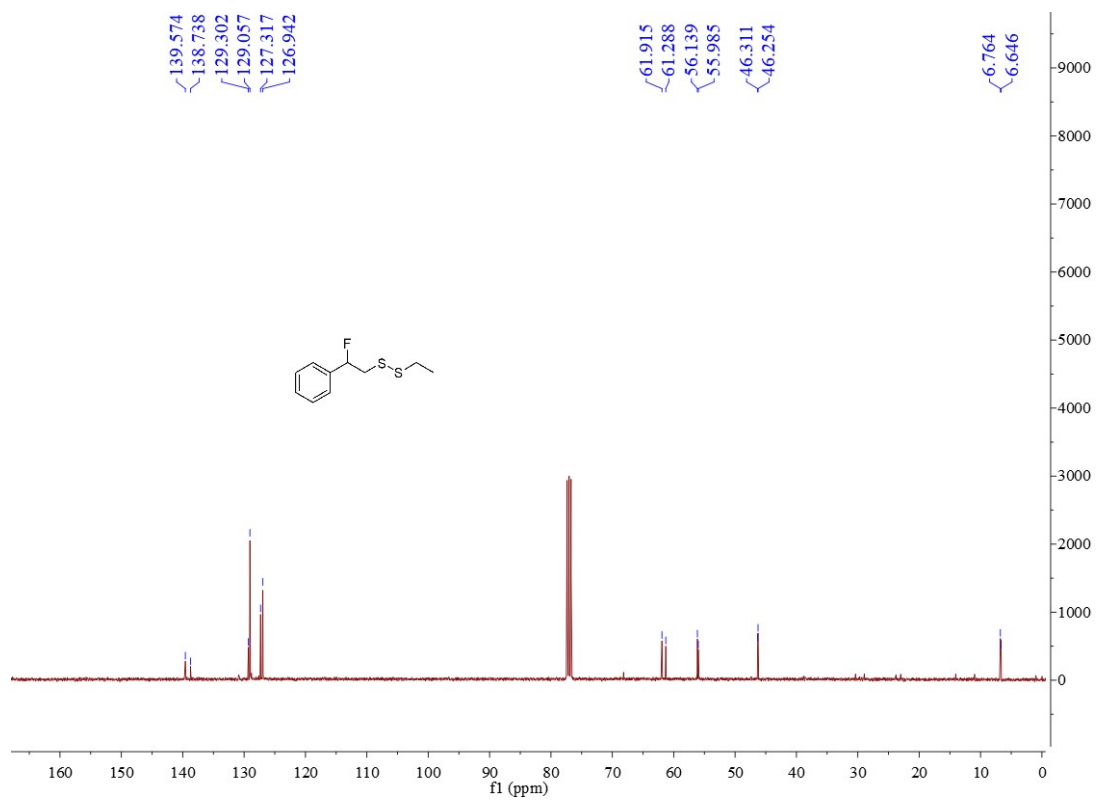

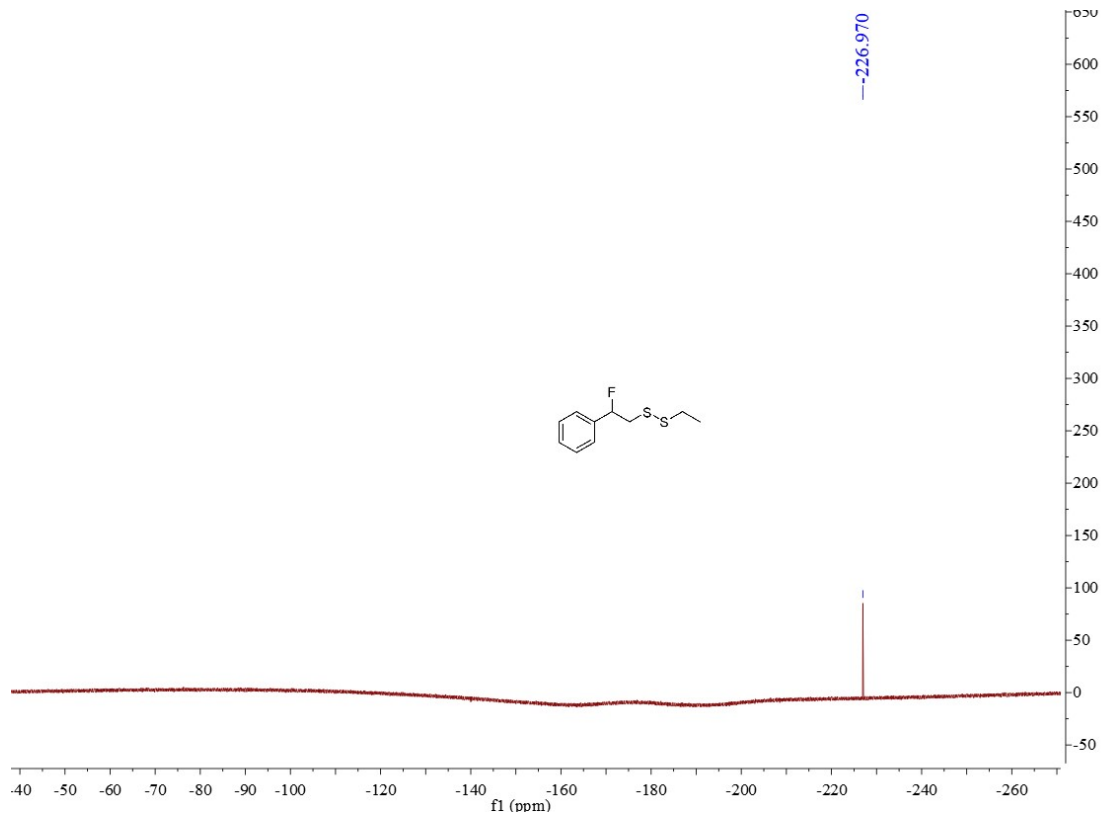

**C14**

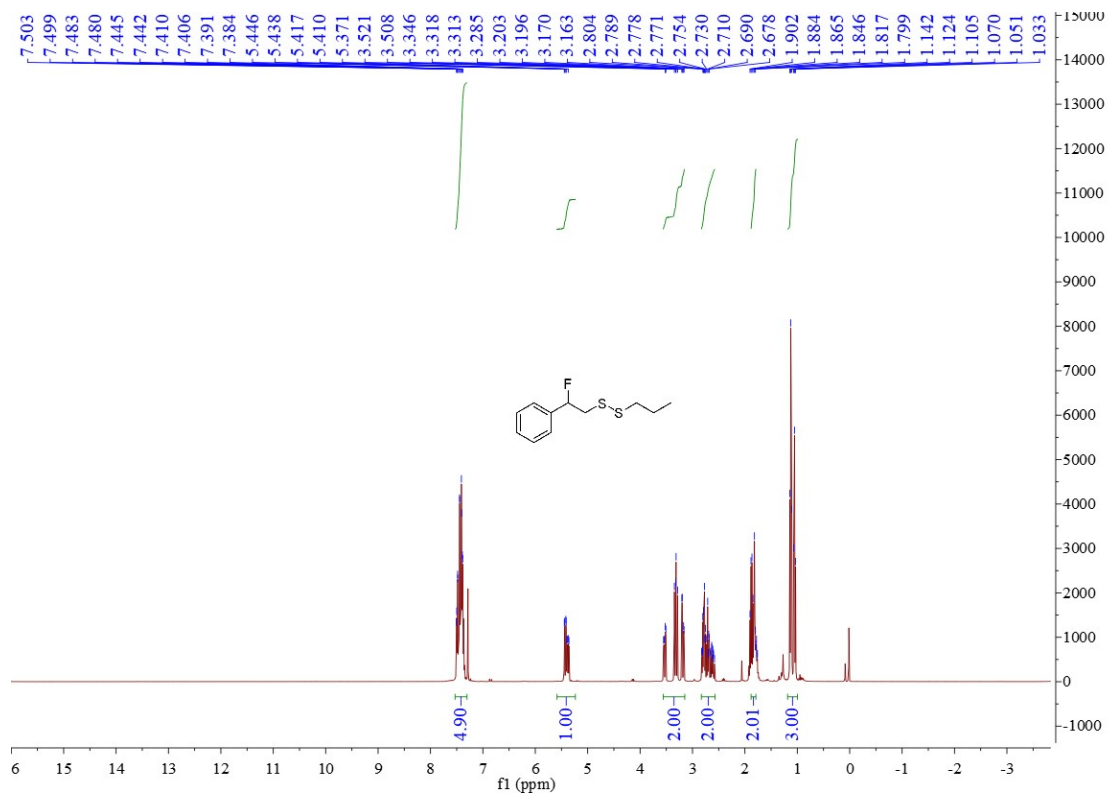

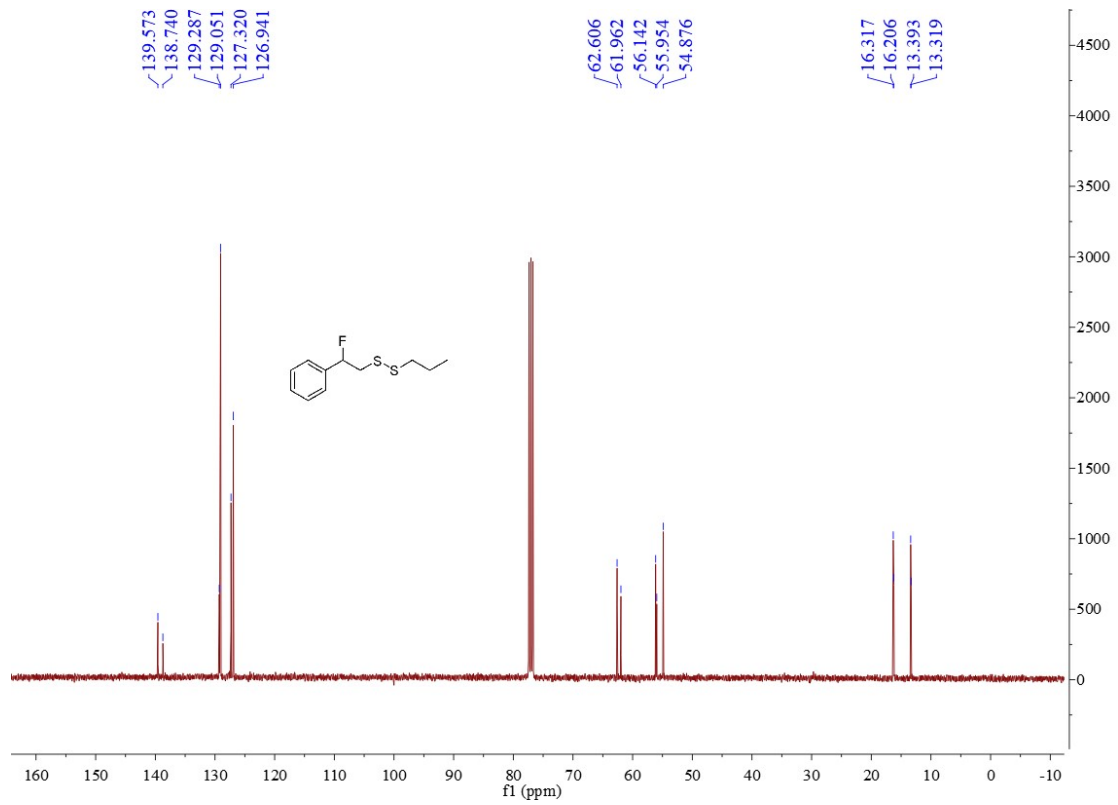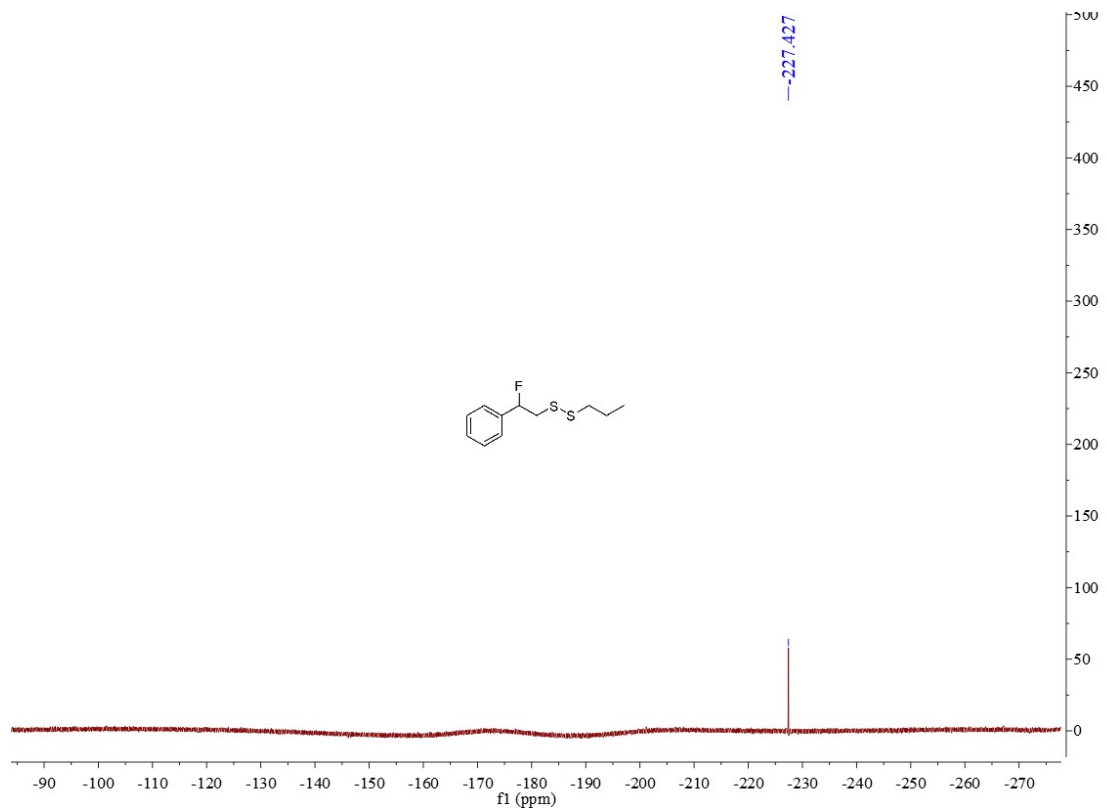



C15

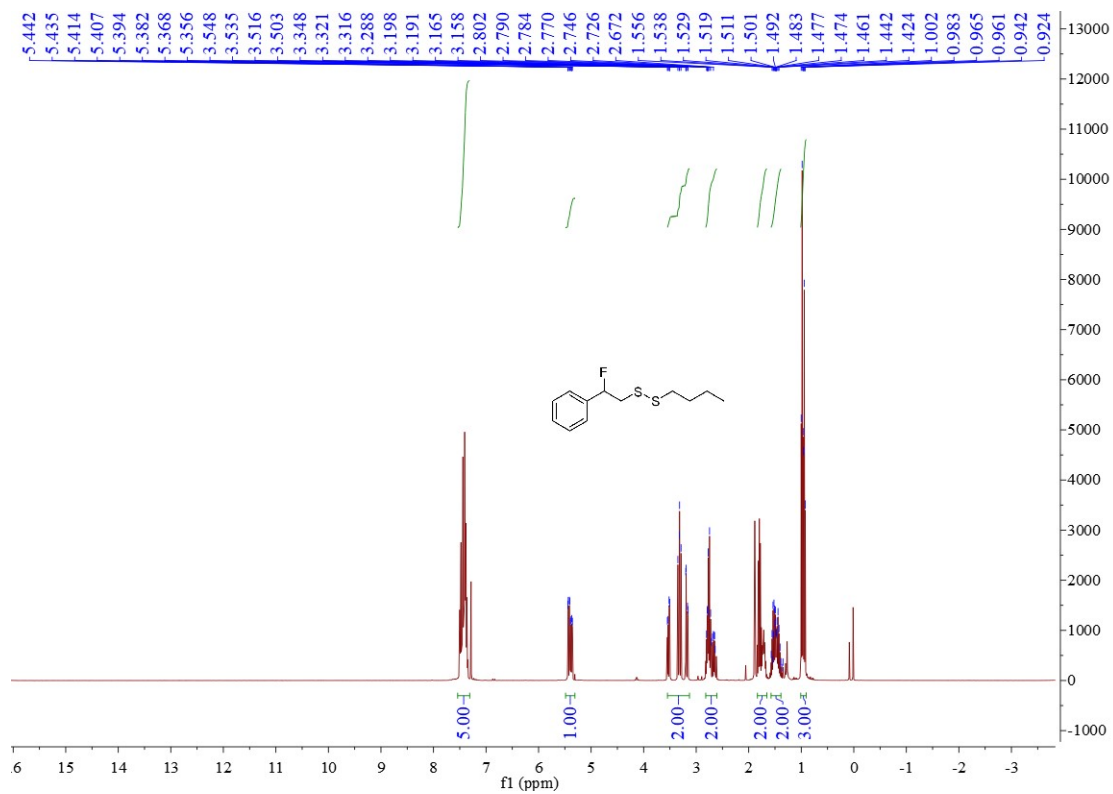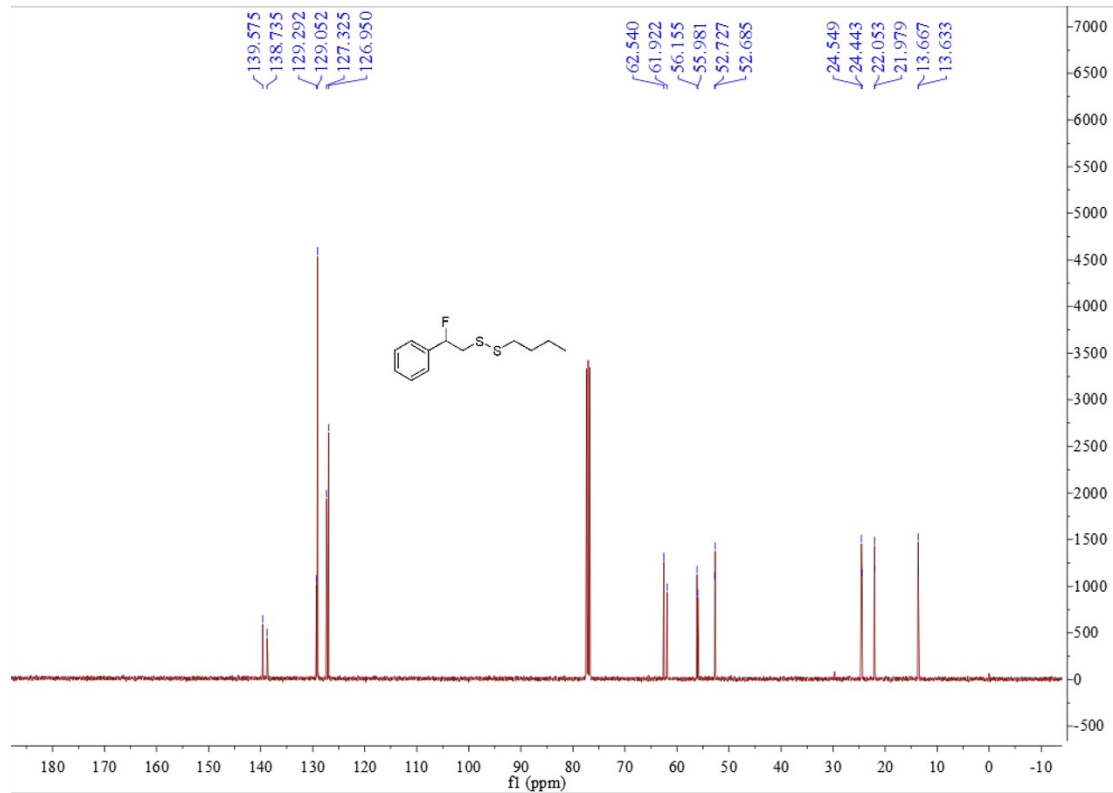

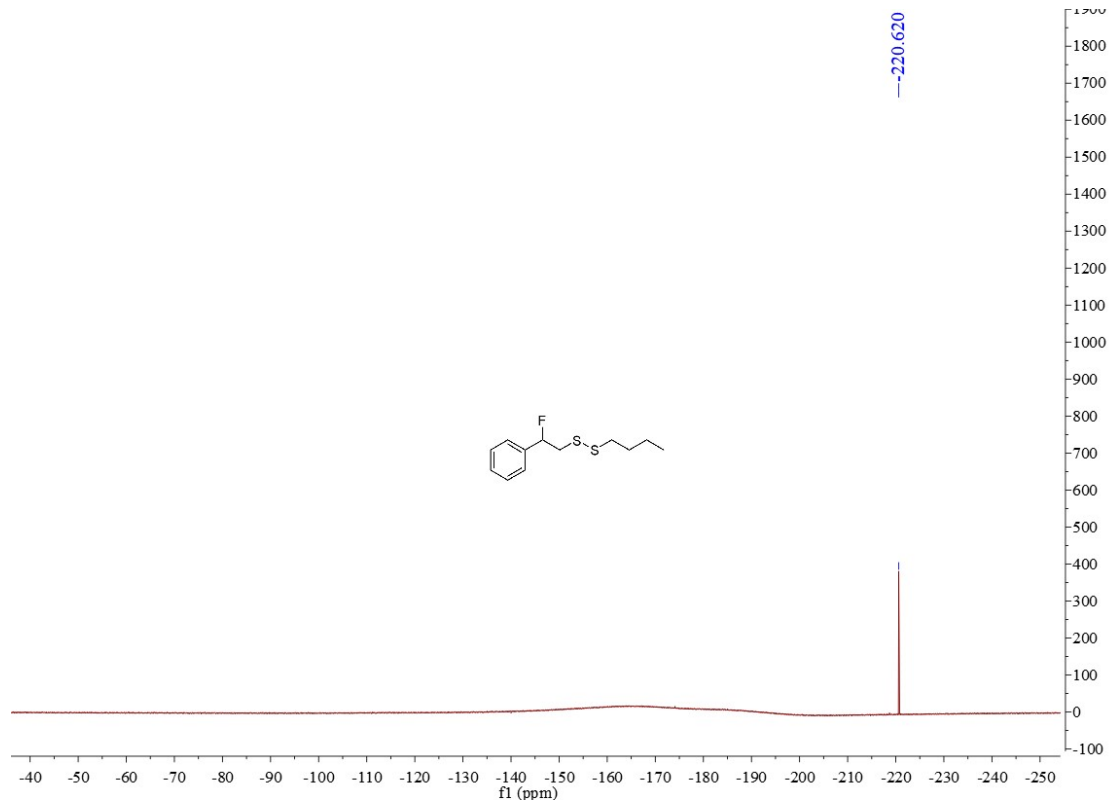

C16

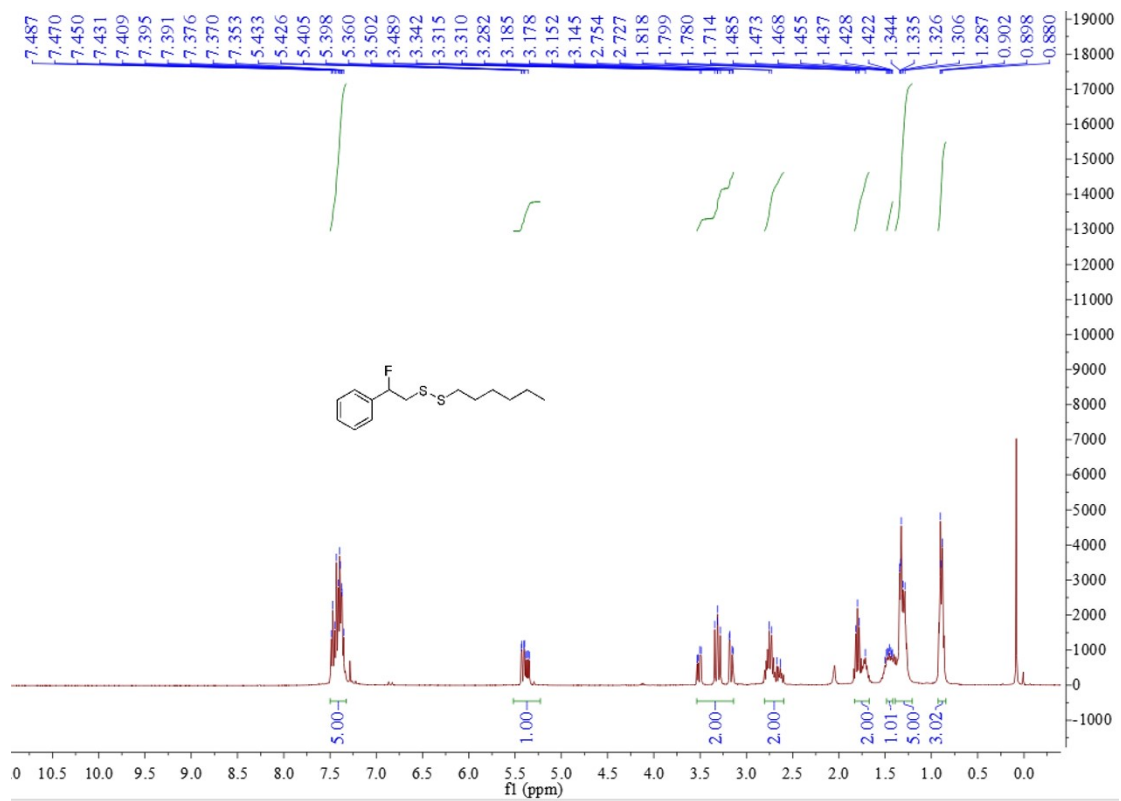

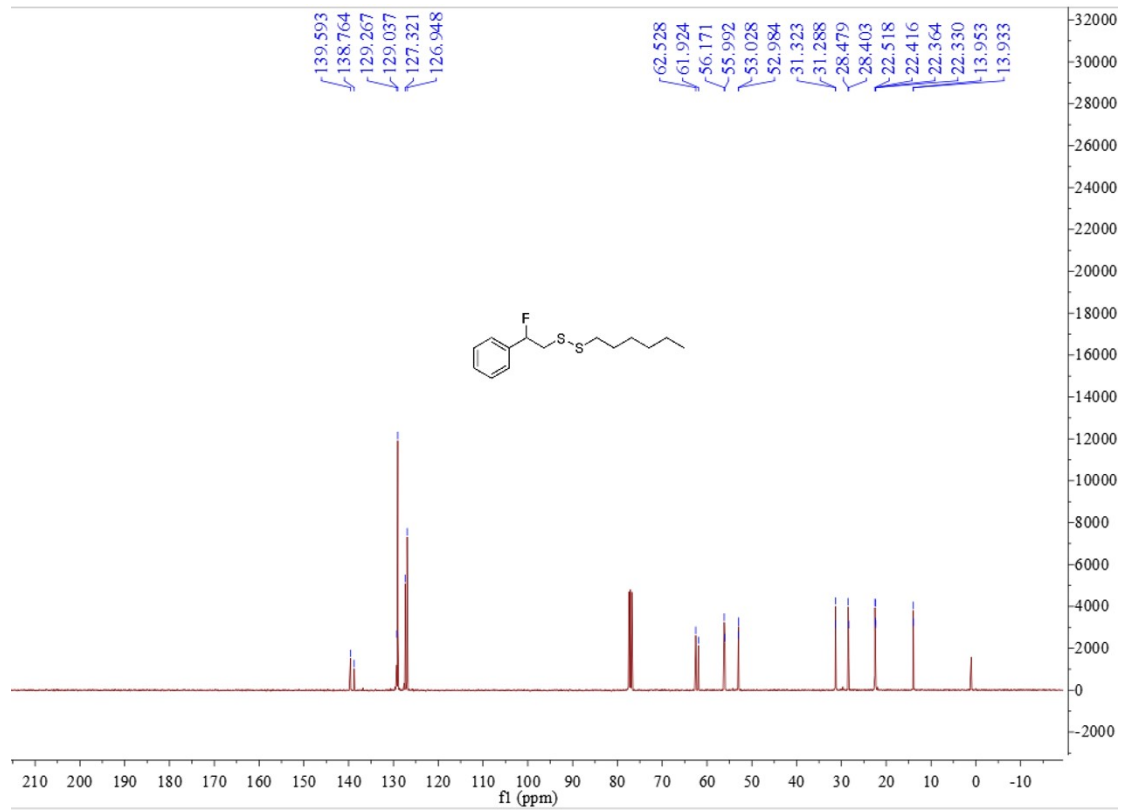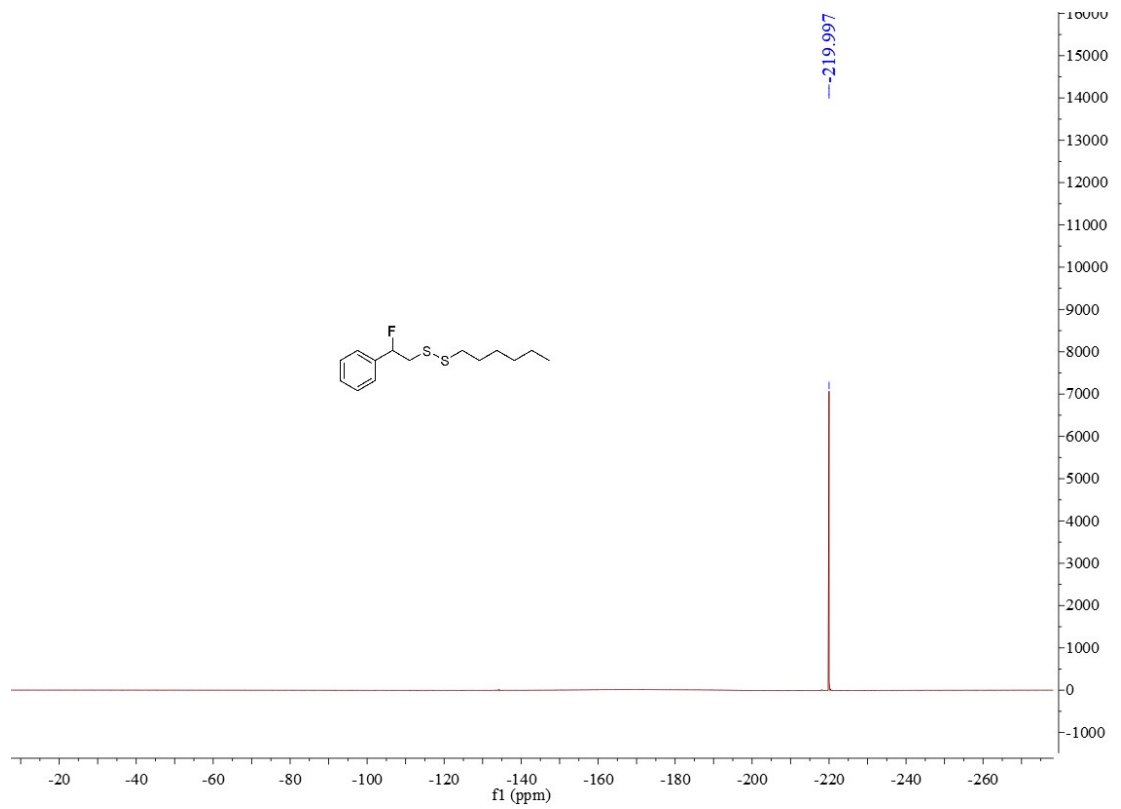

C17

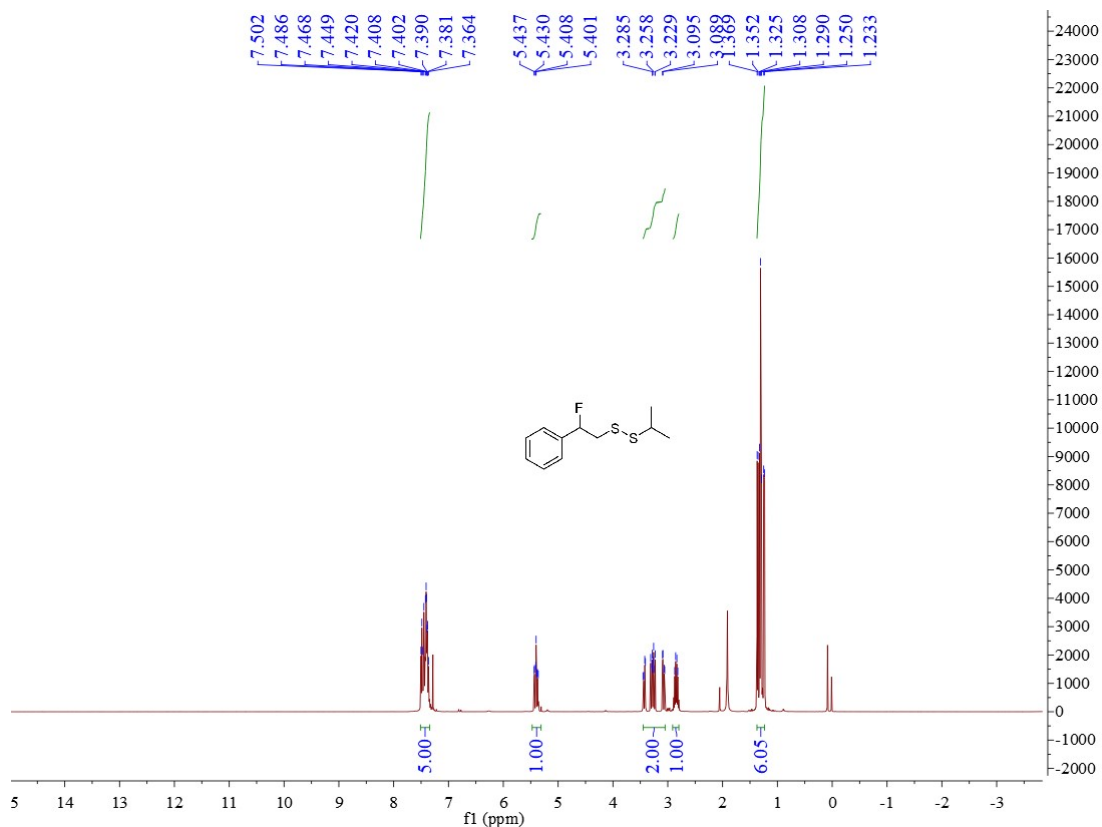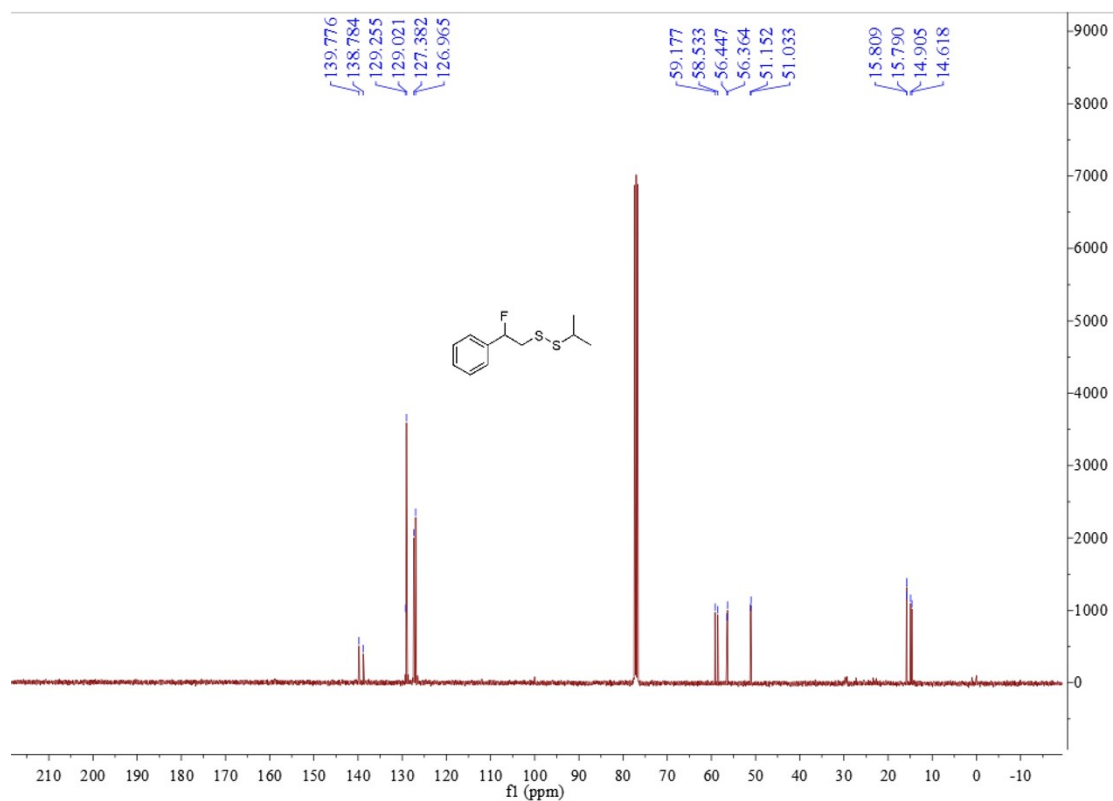

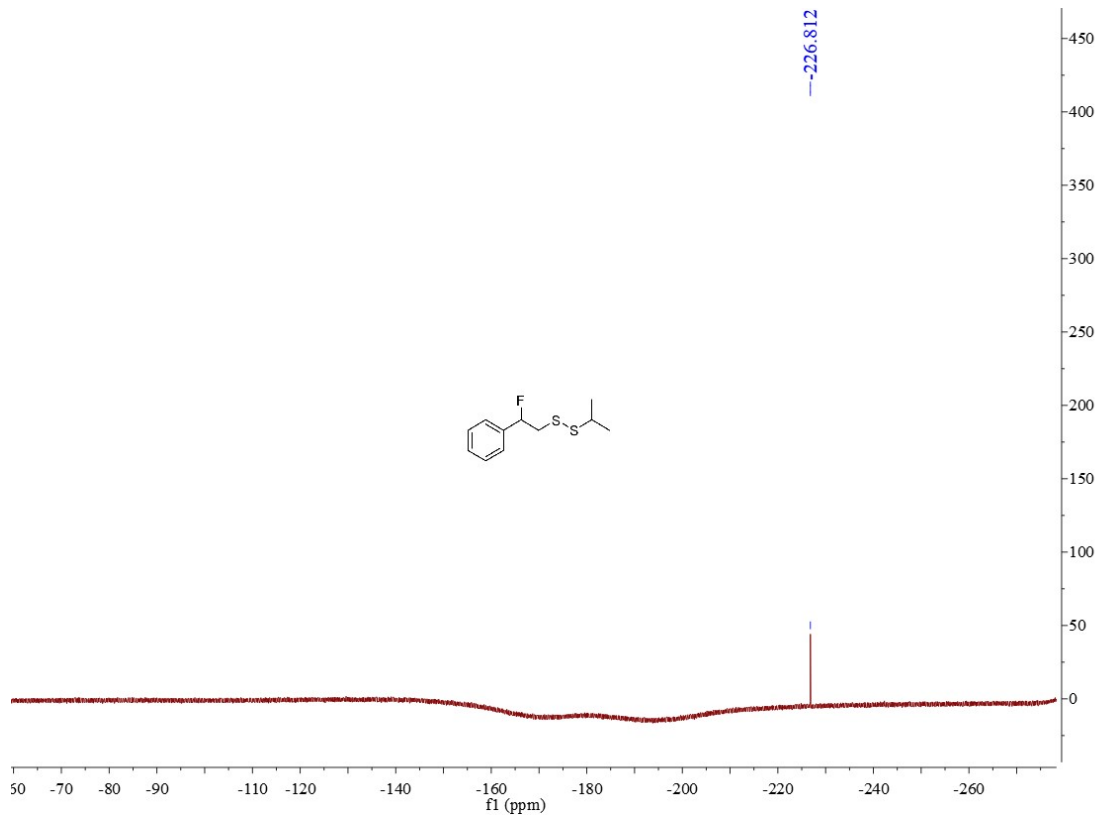

**C18**

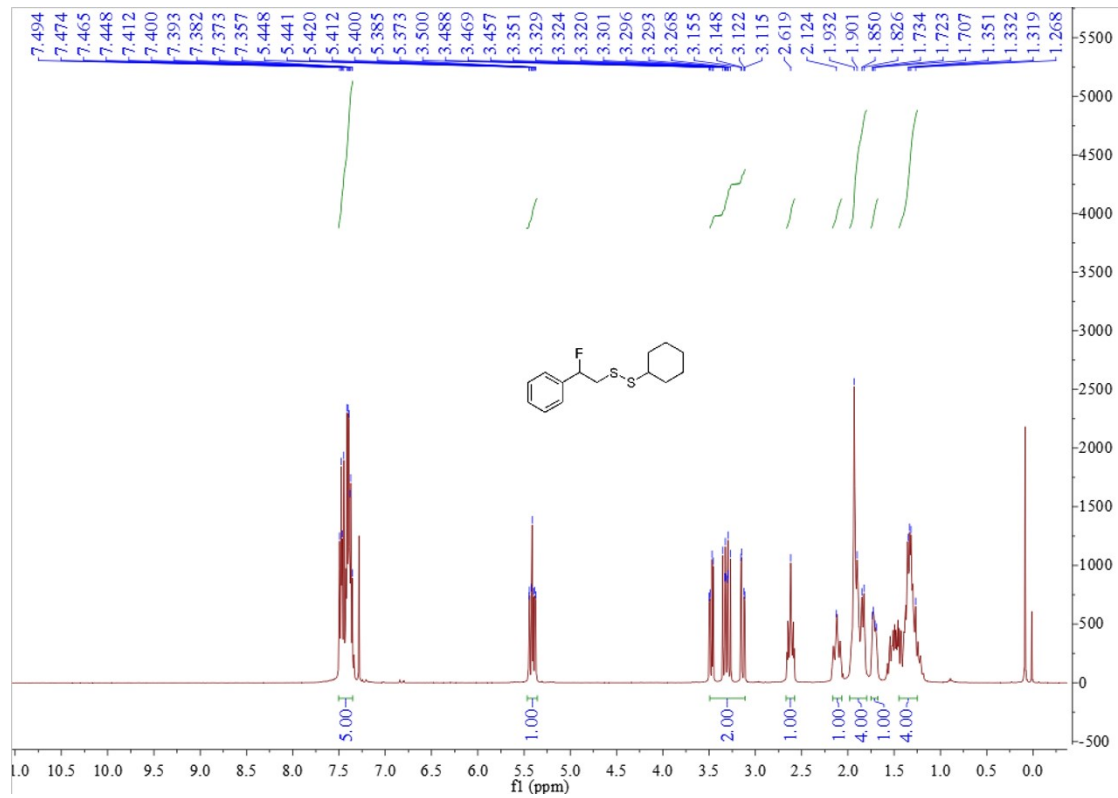

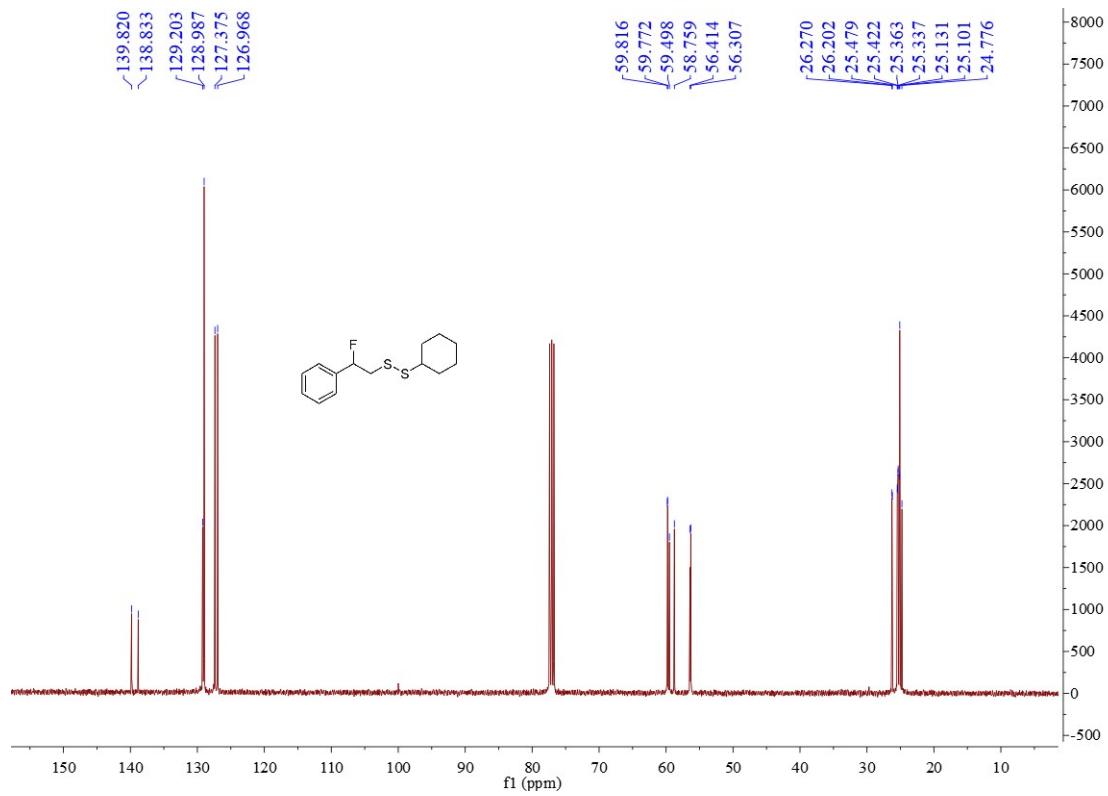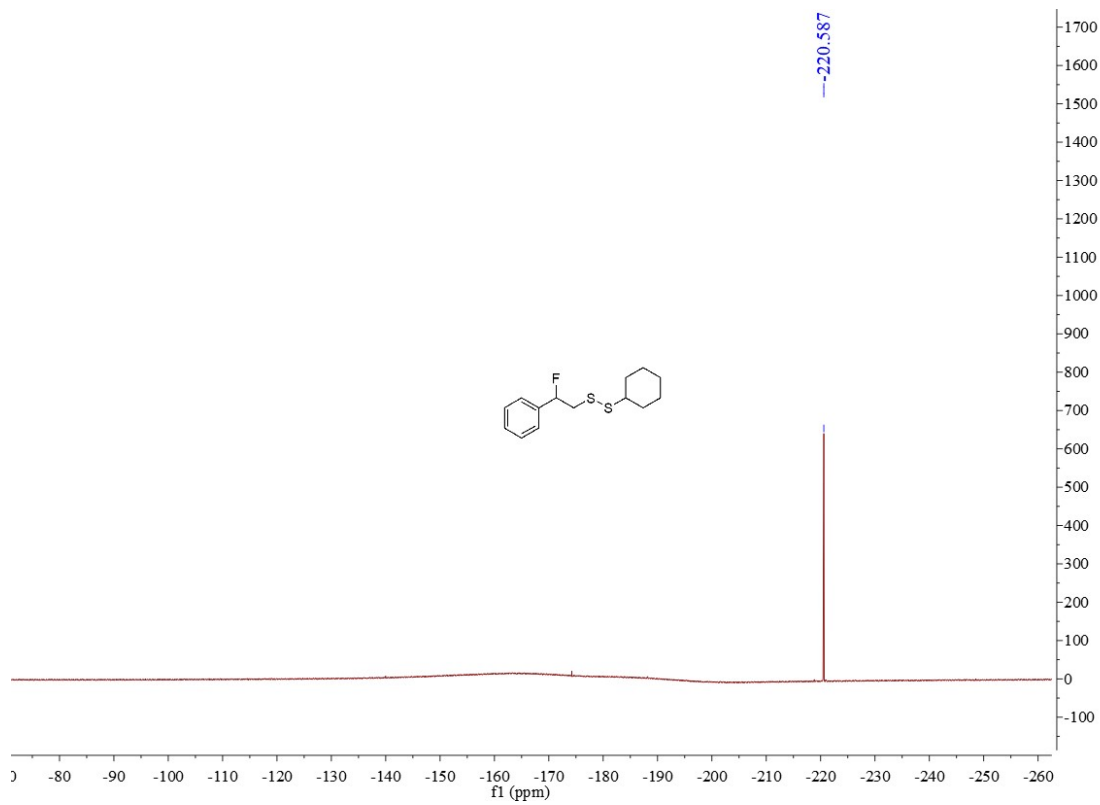

C19

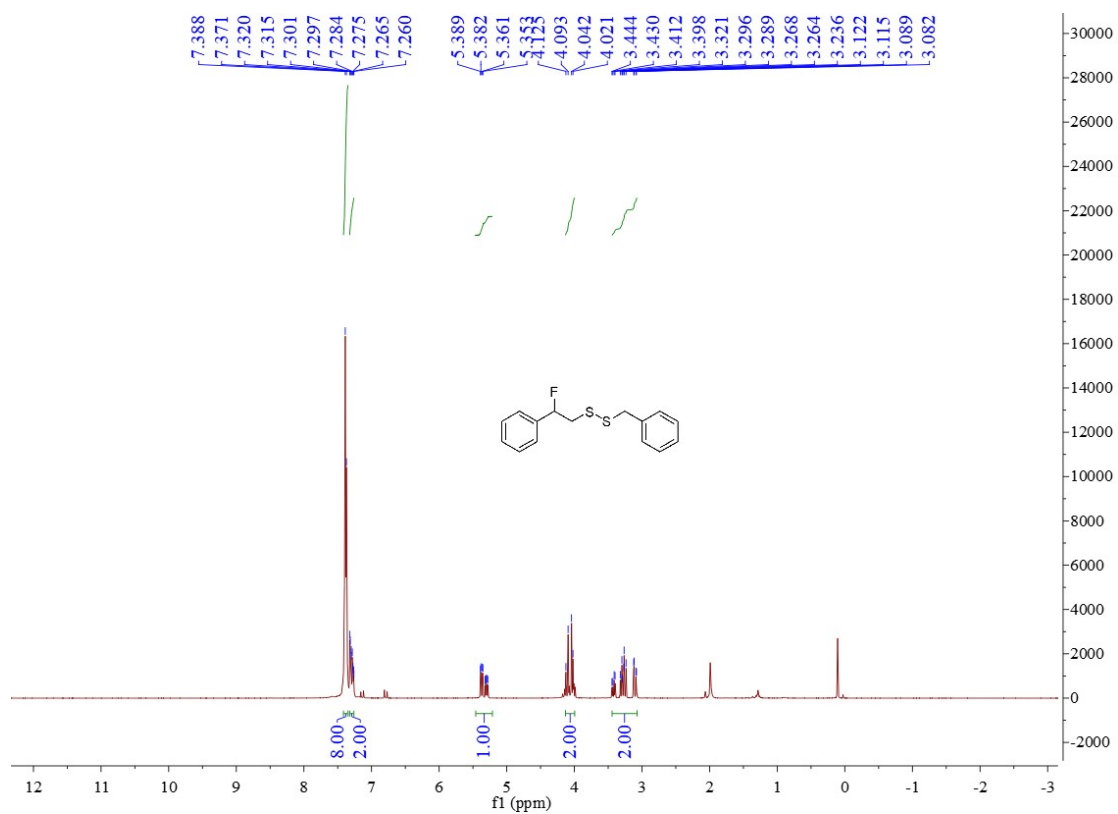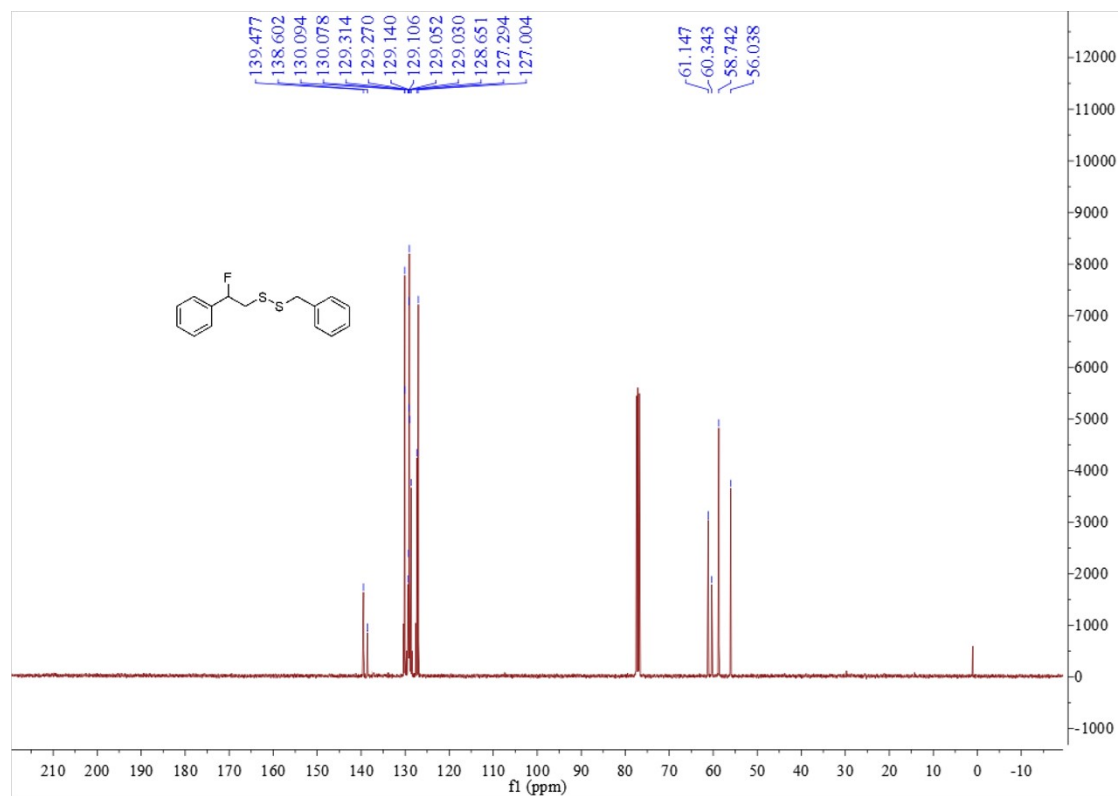

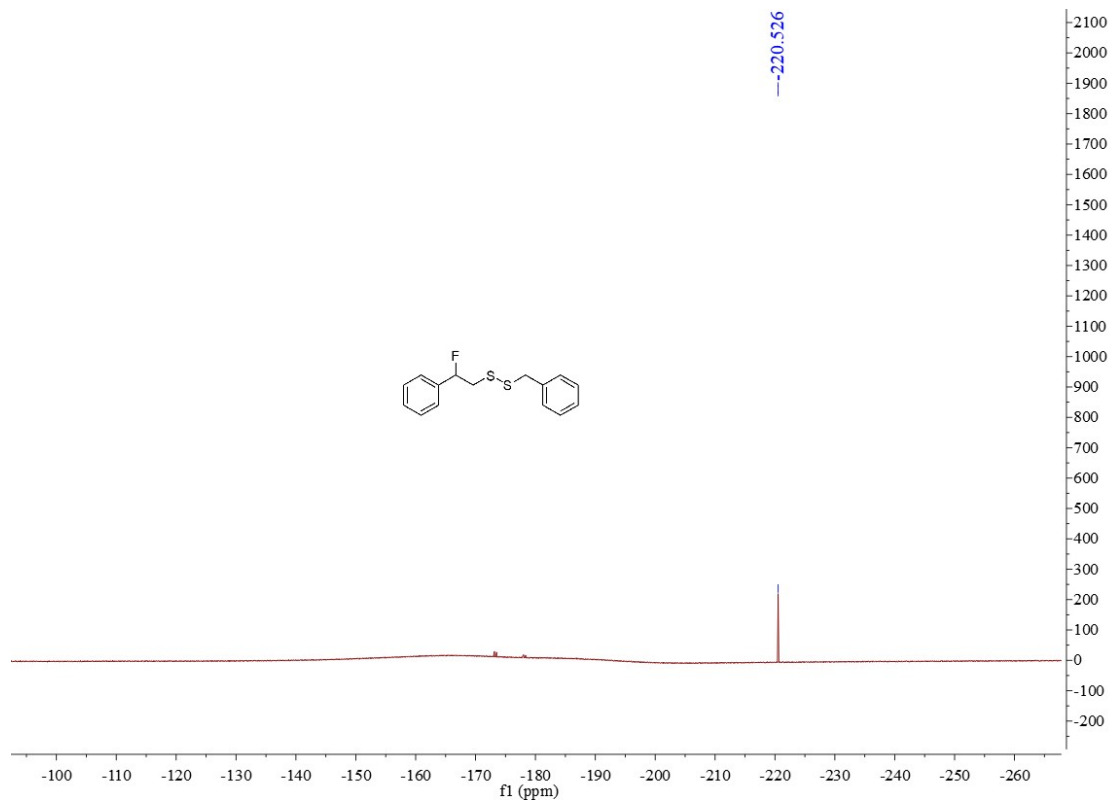

**C20**

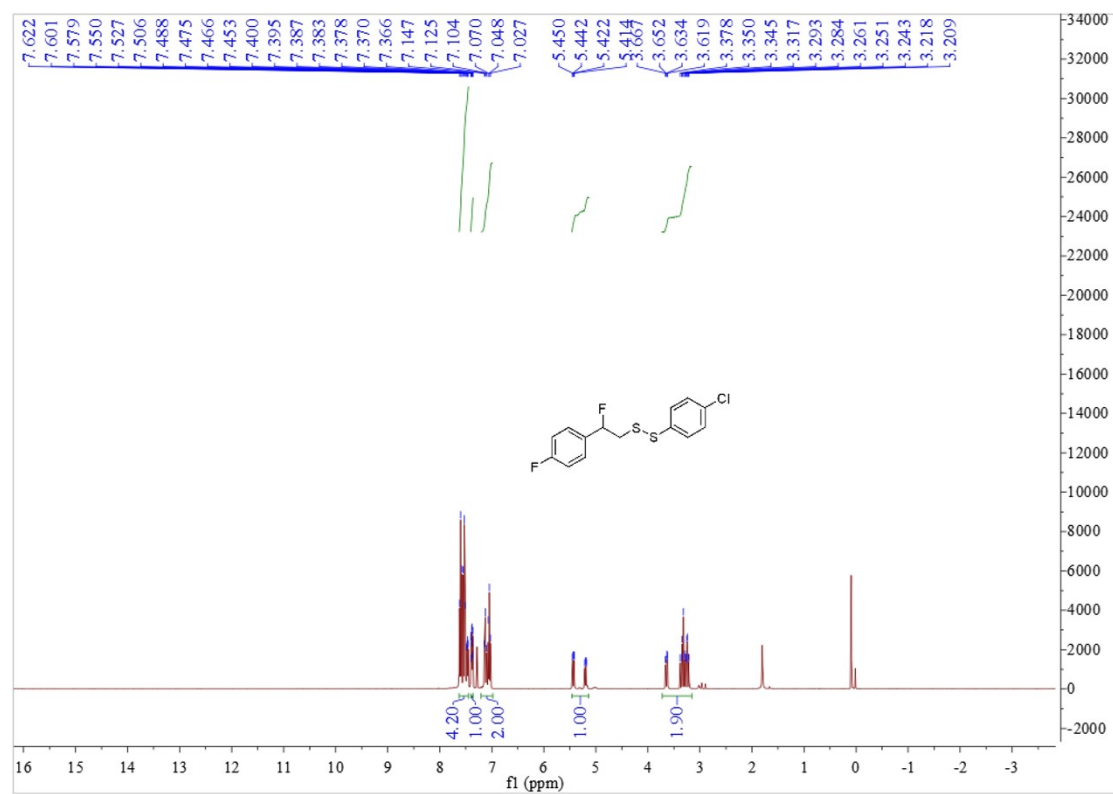



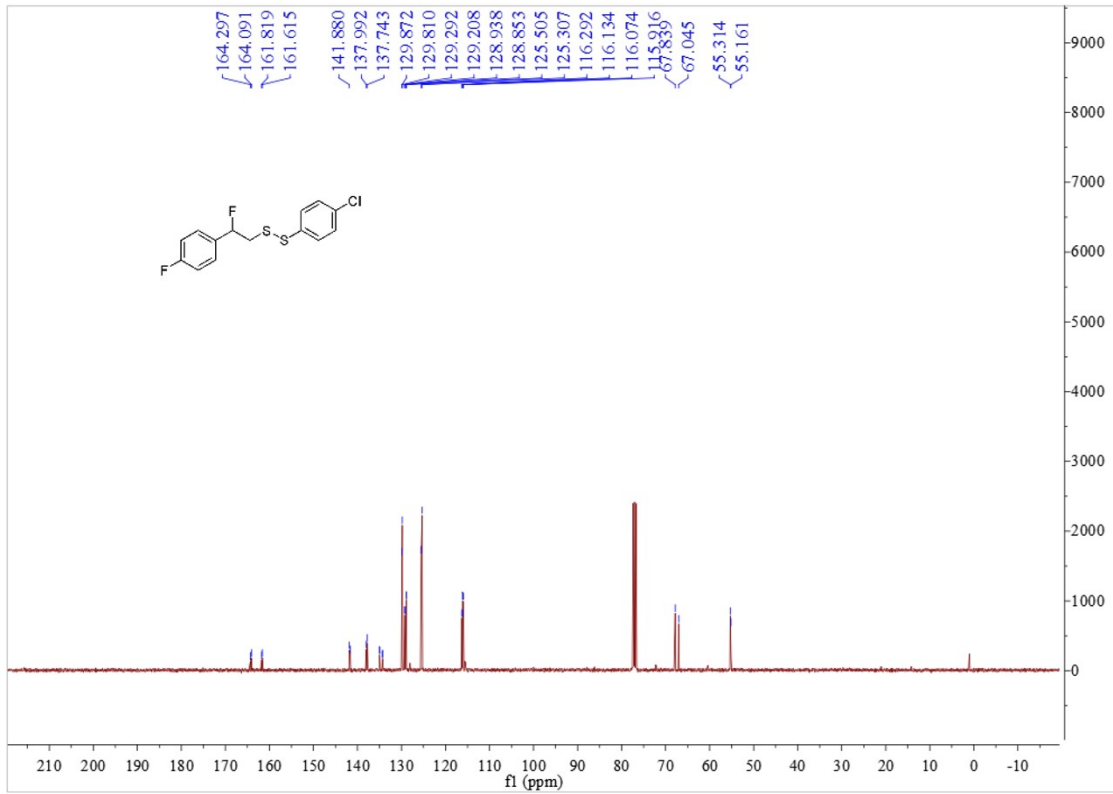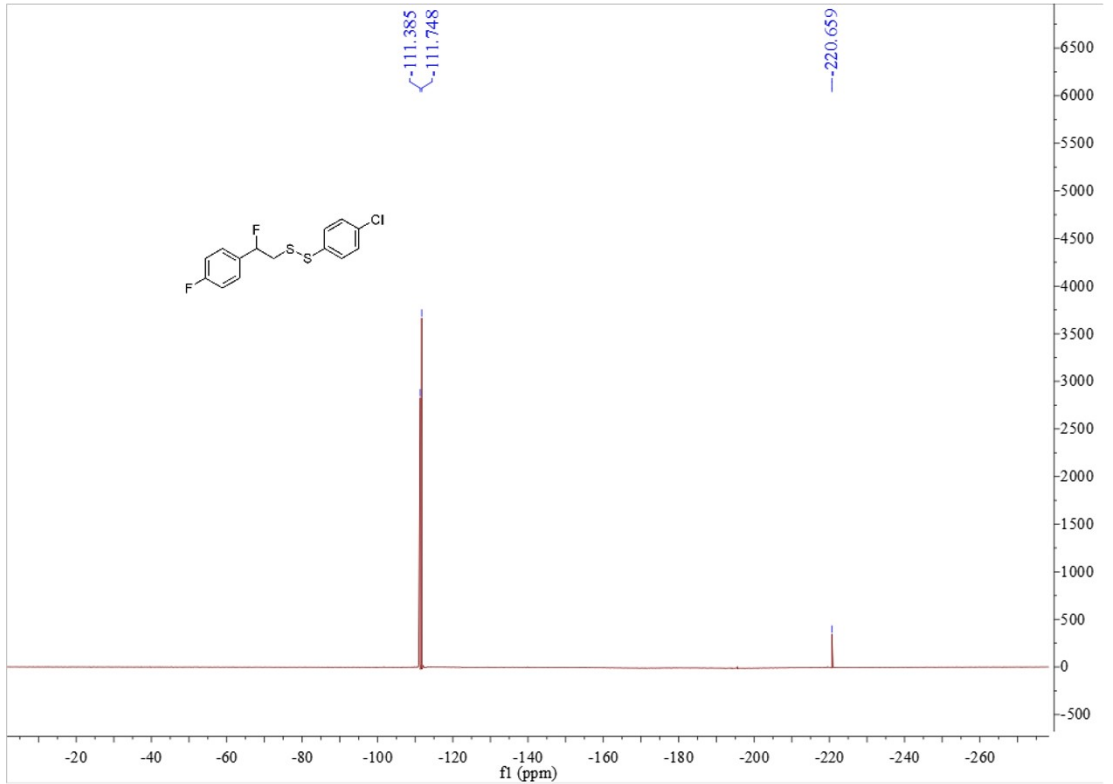

C21

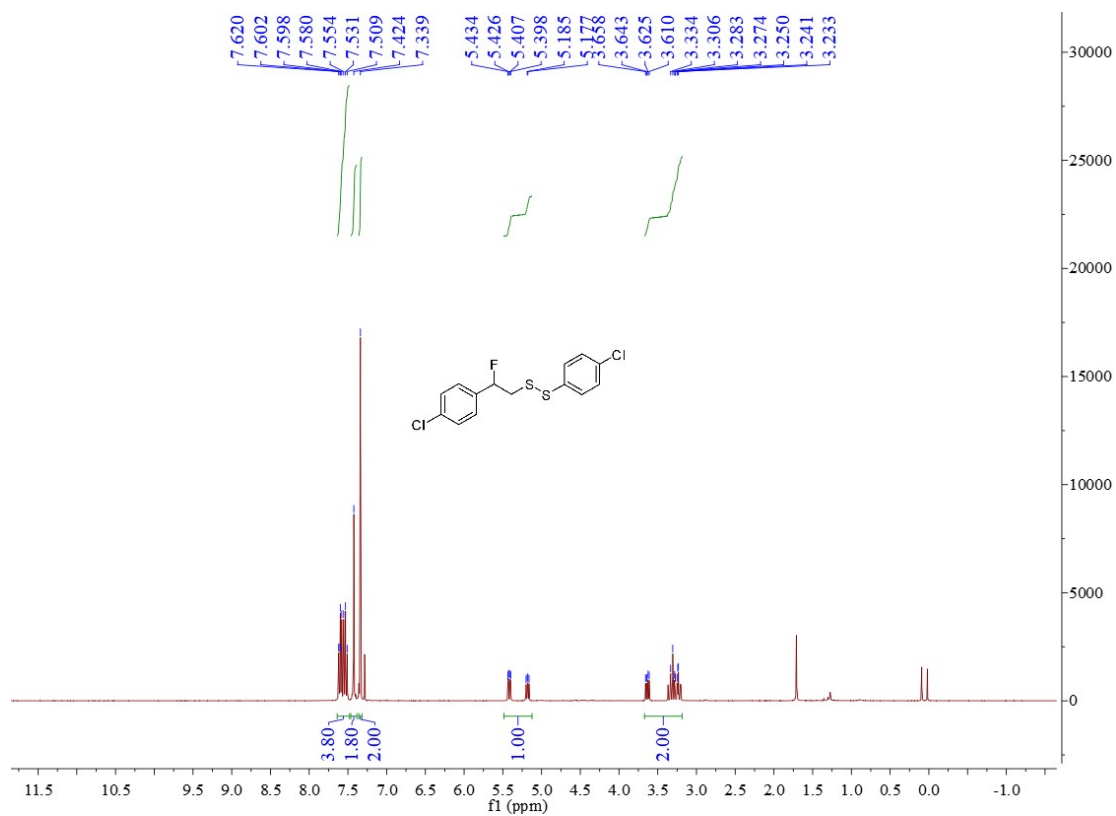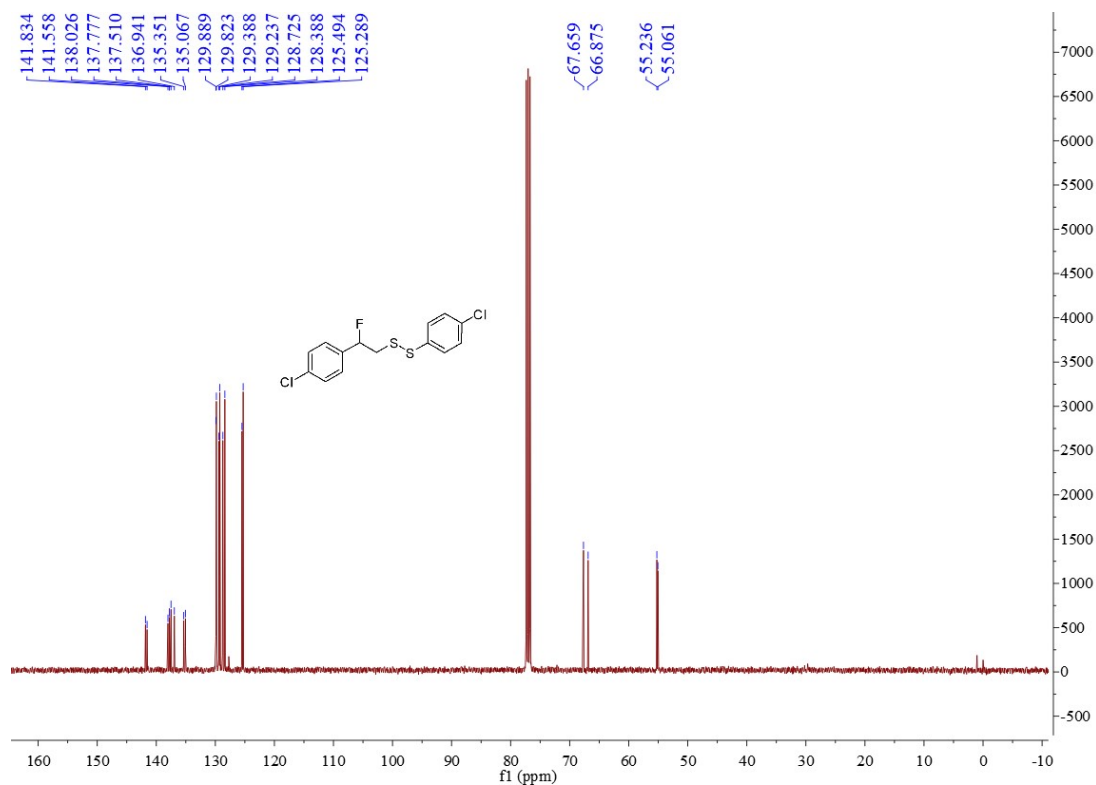

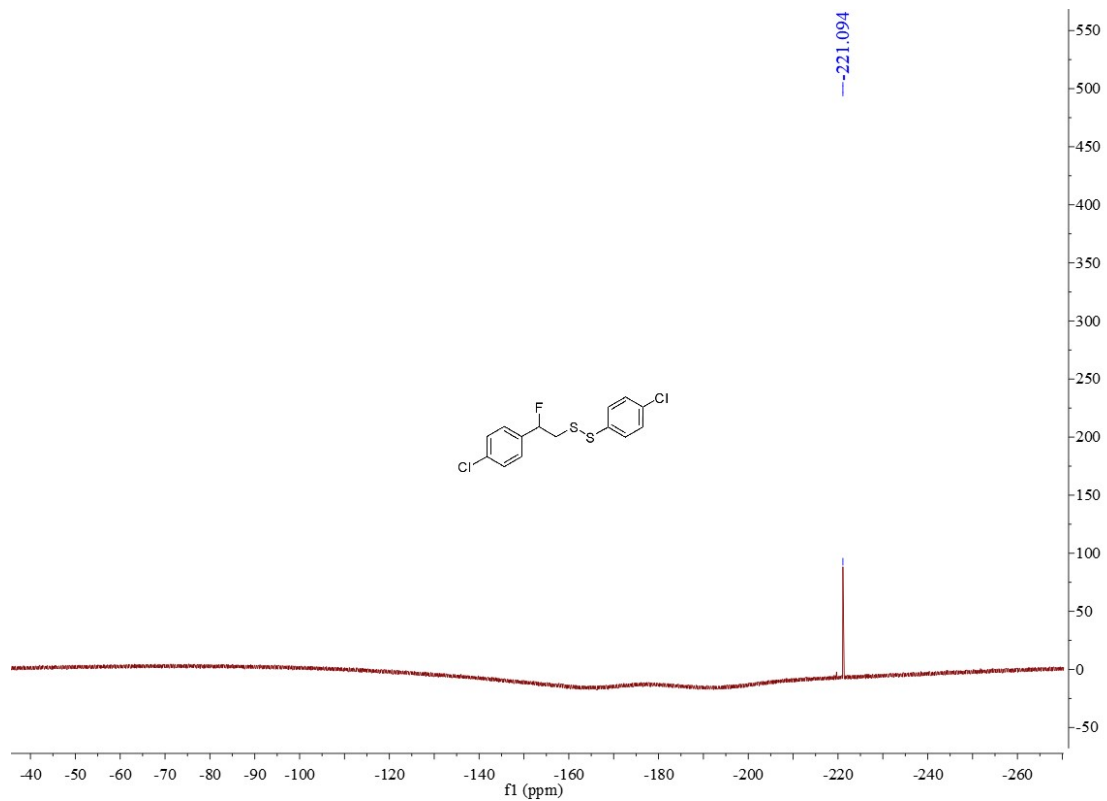

C22

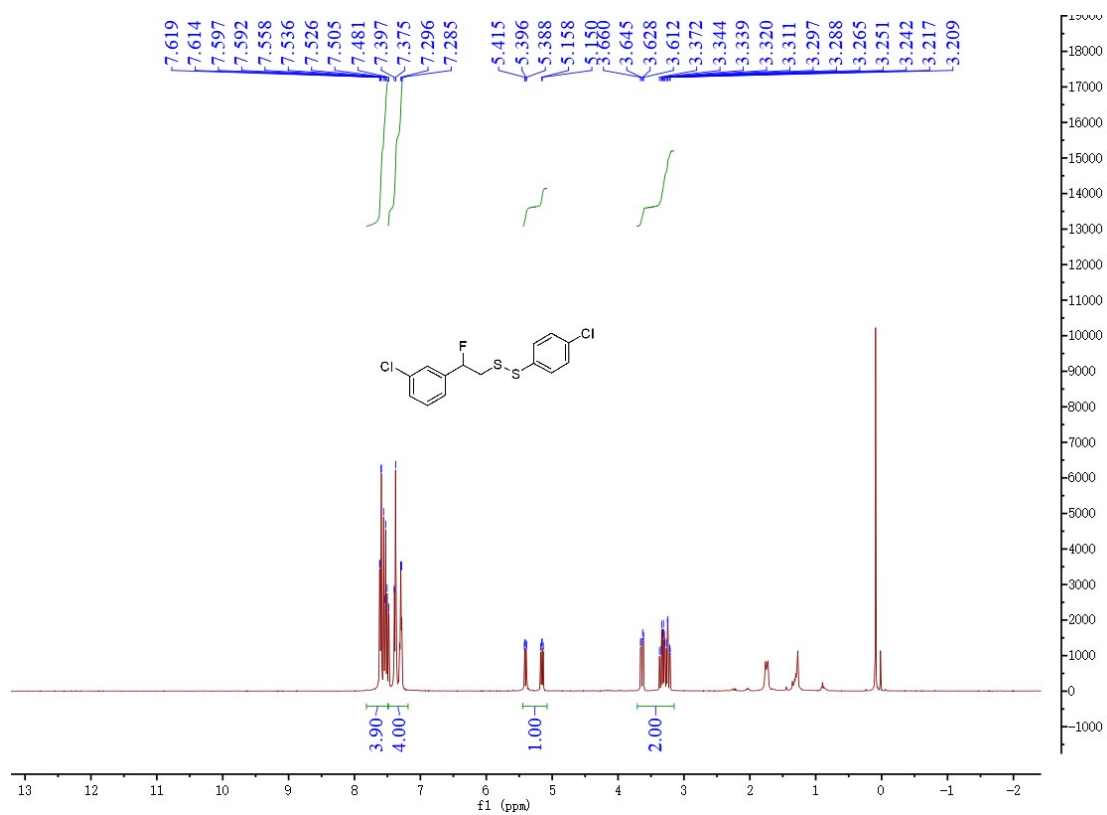

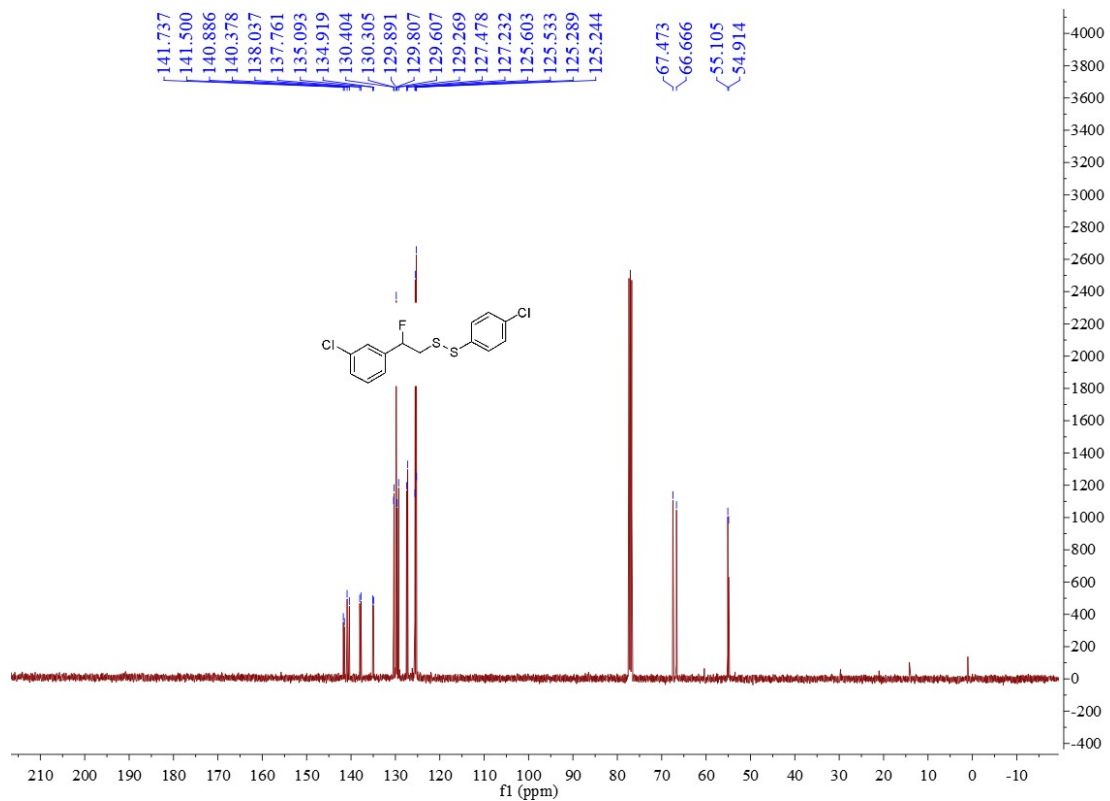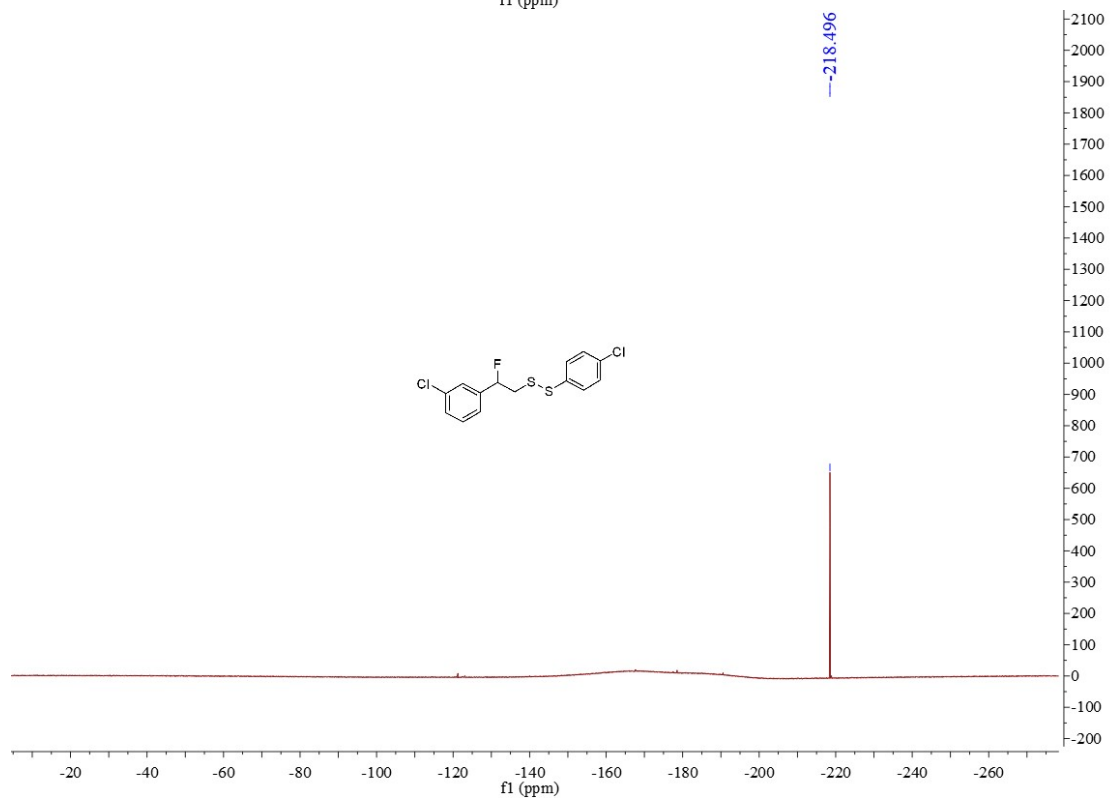

C23

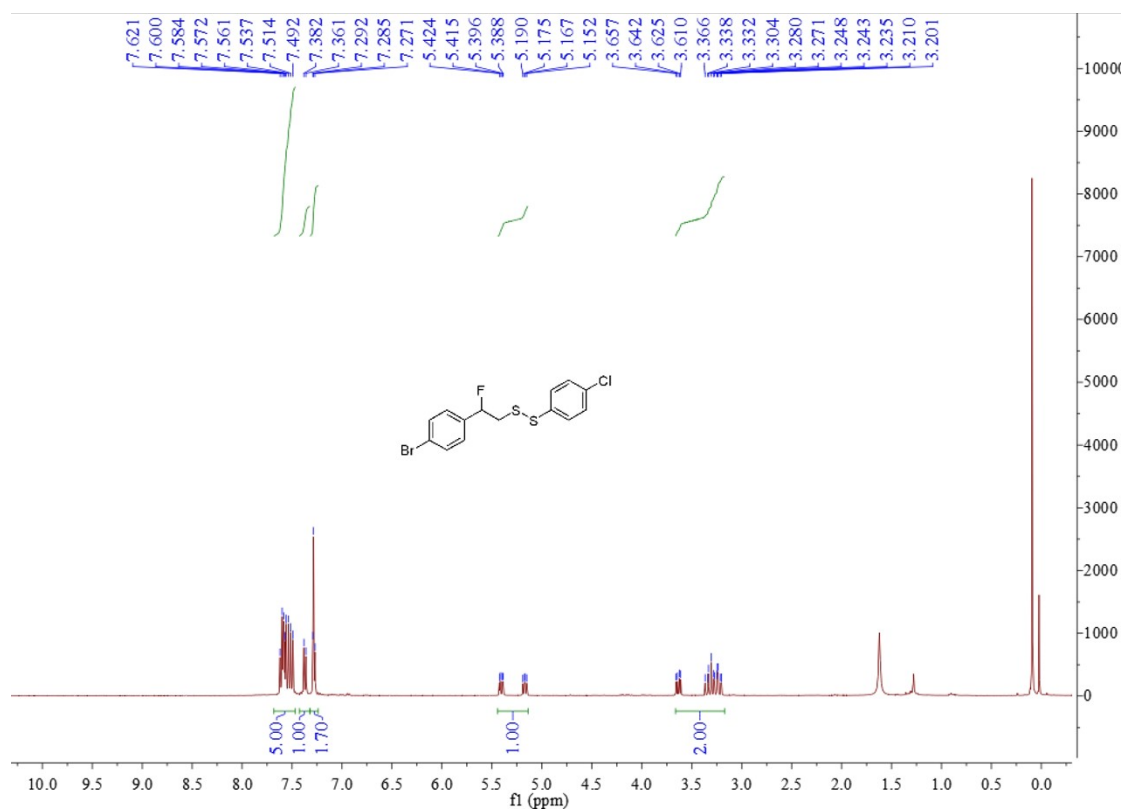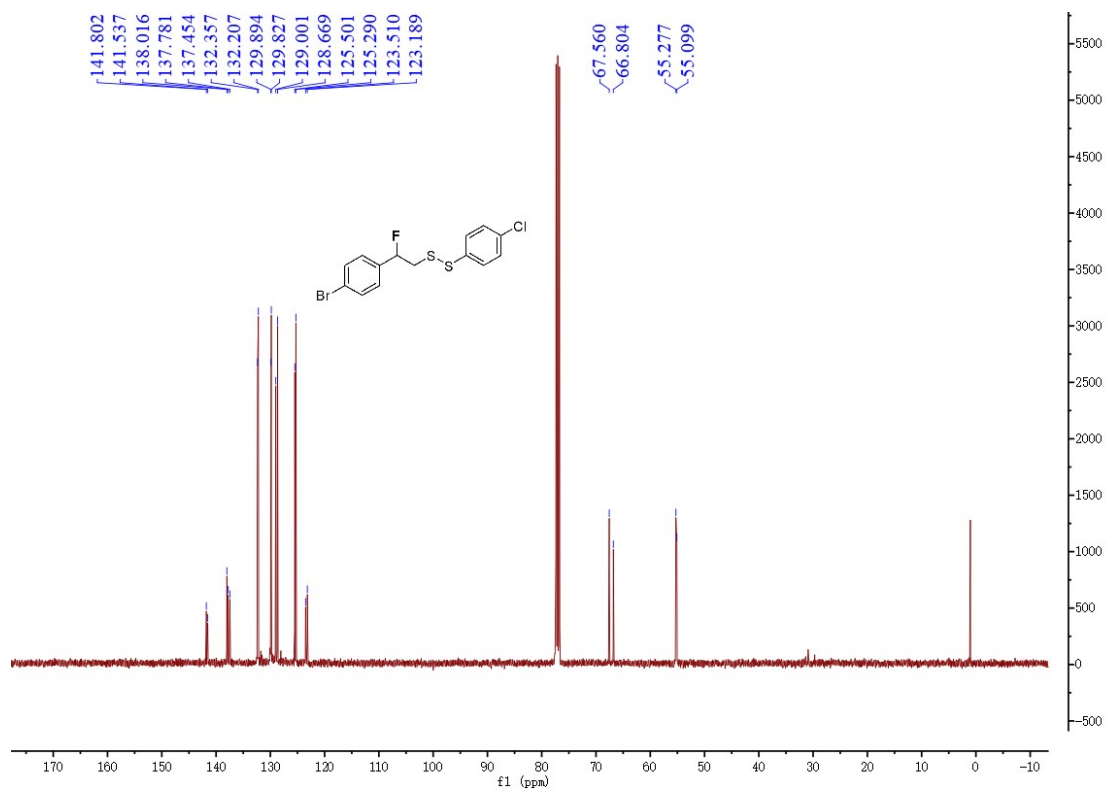

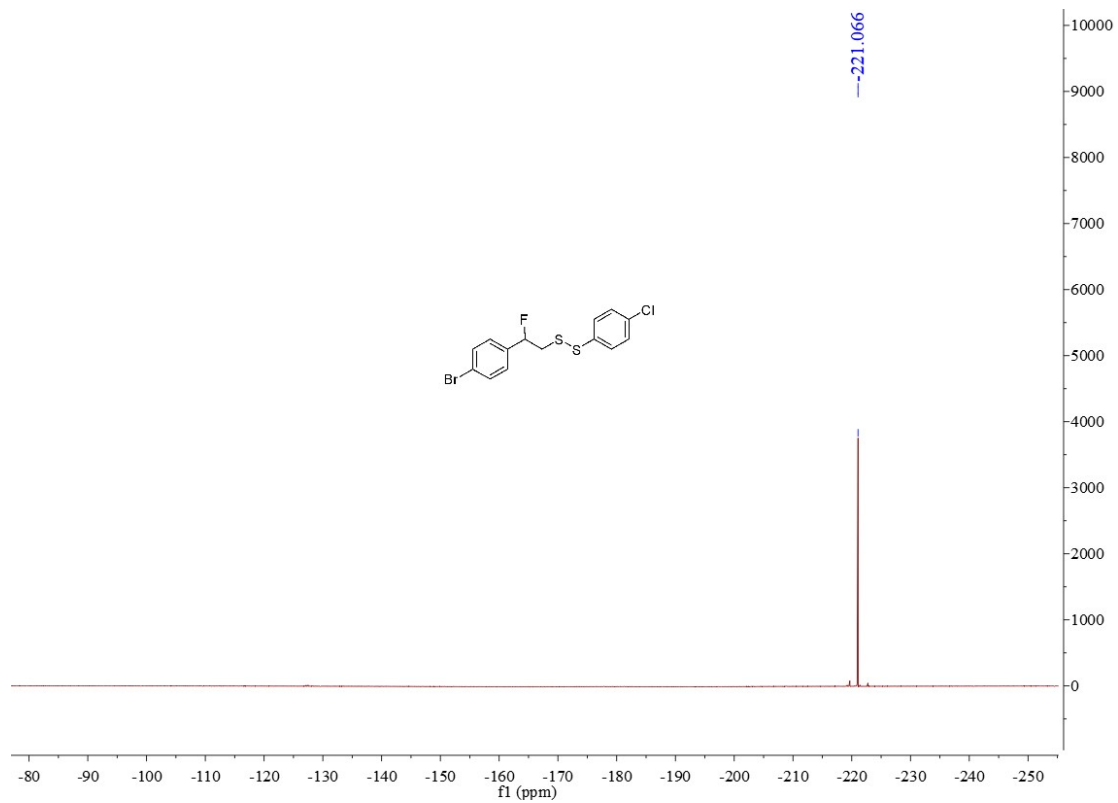

C24

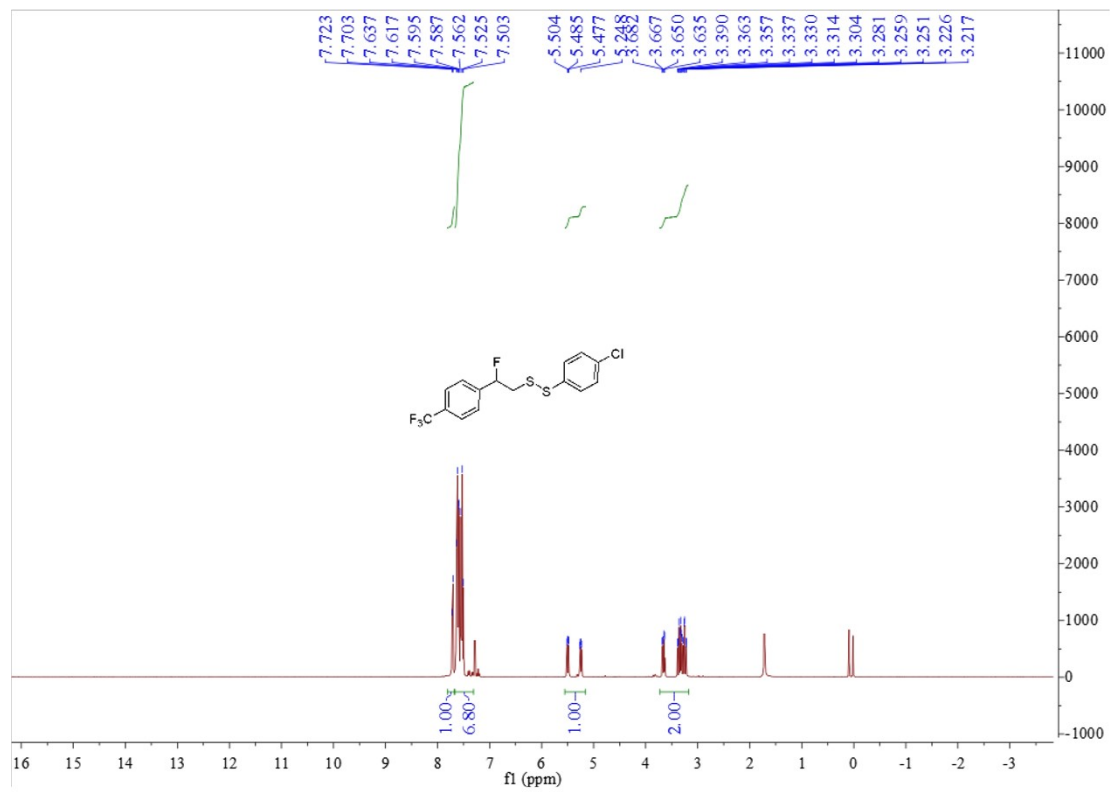

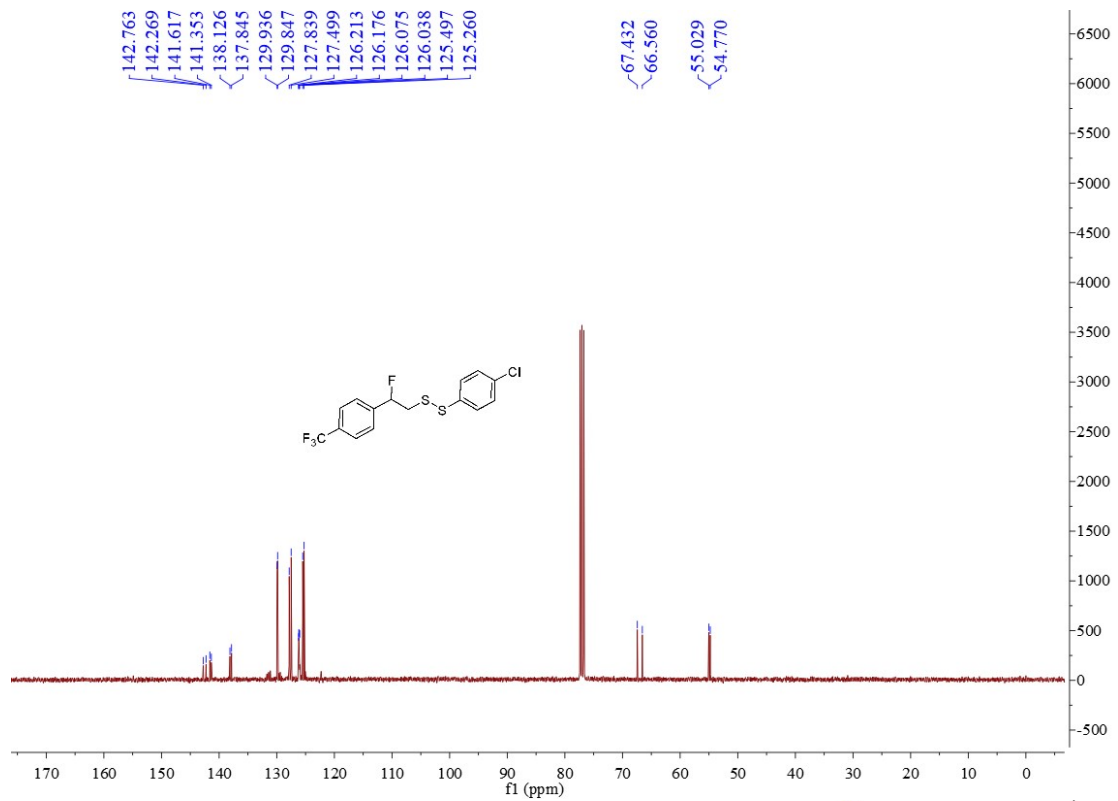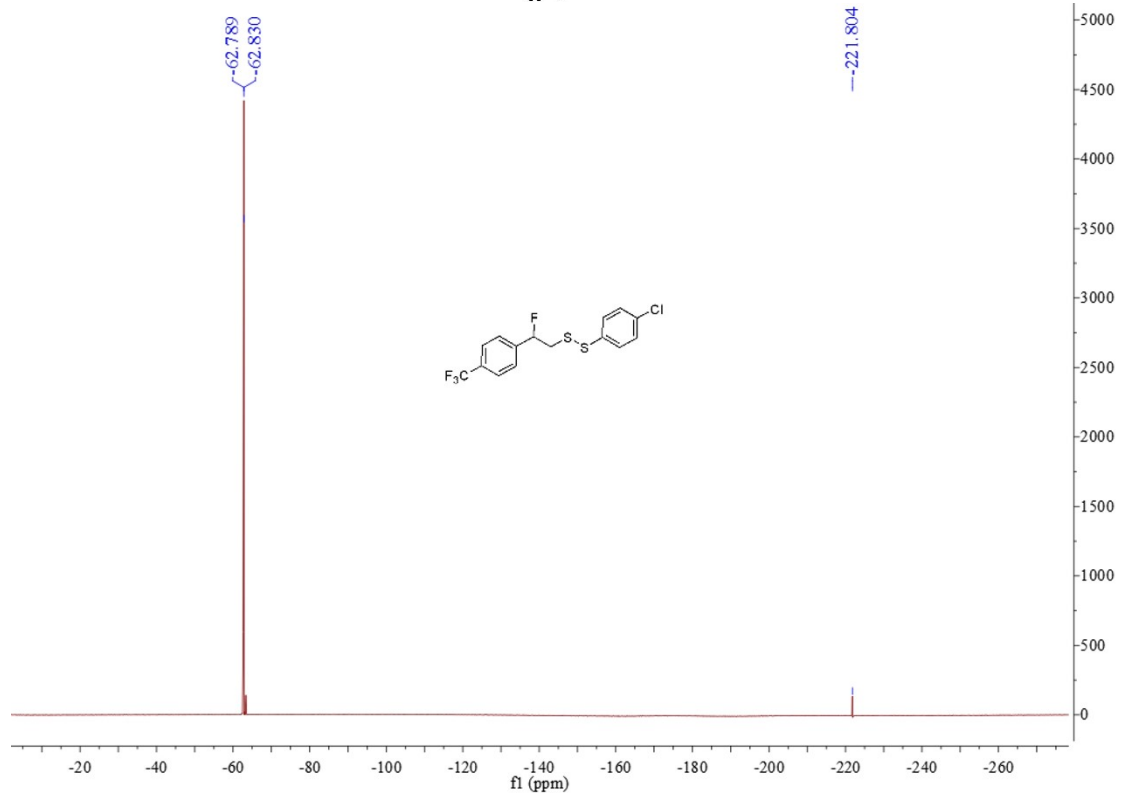

C25

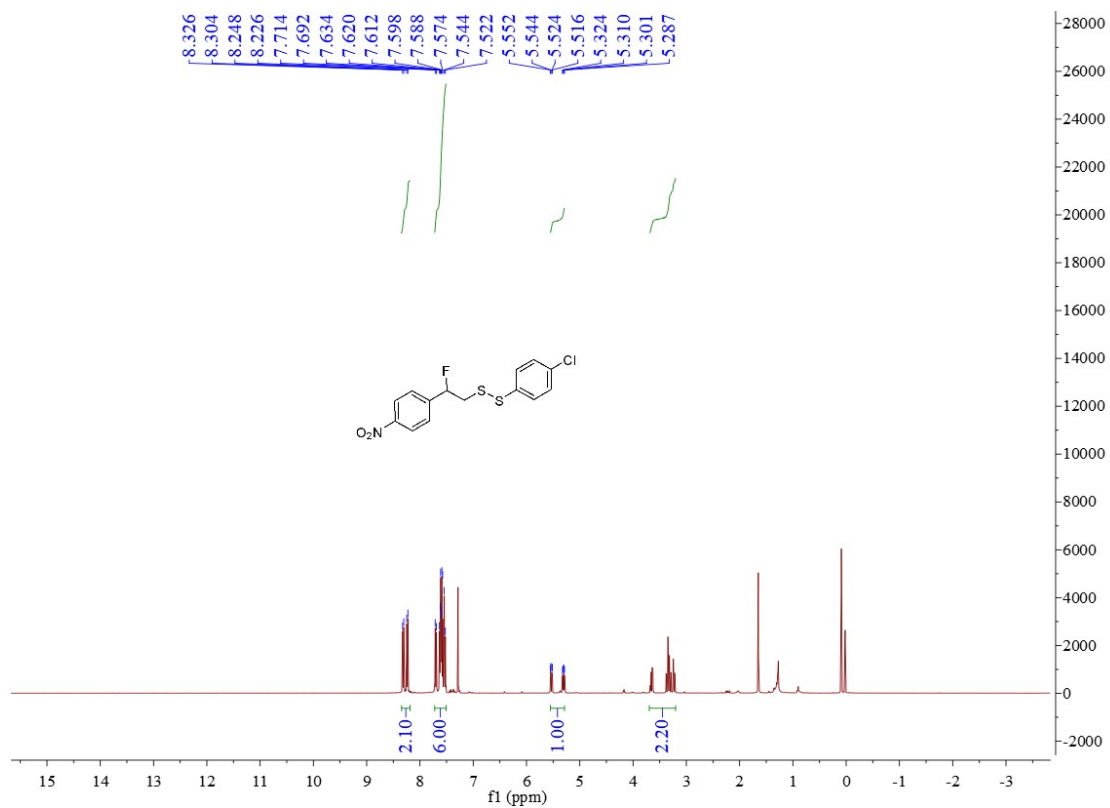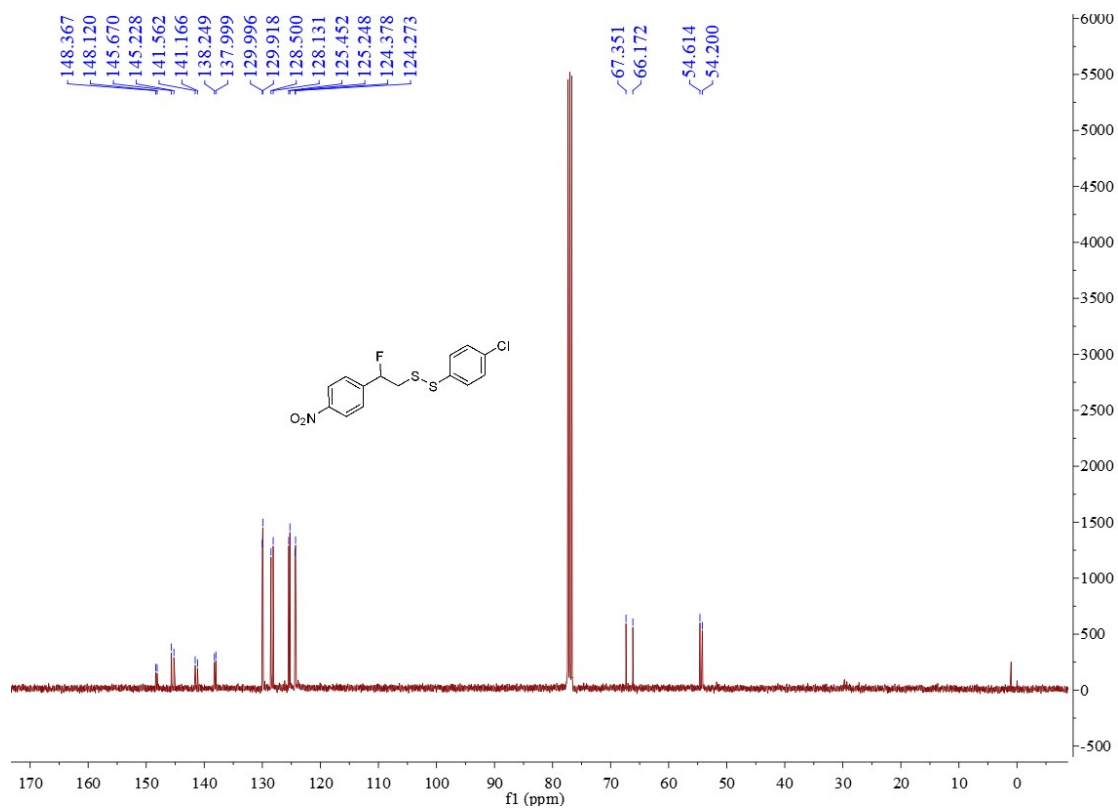



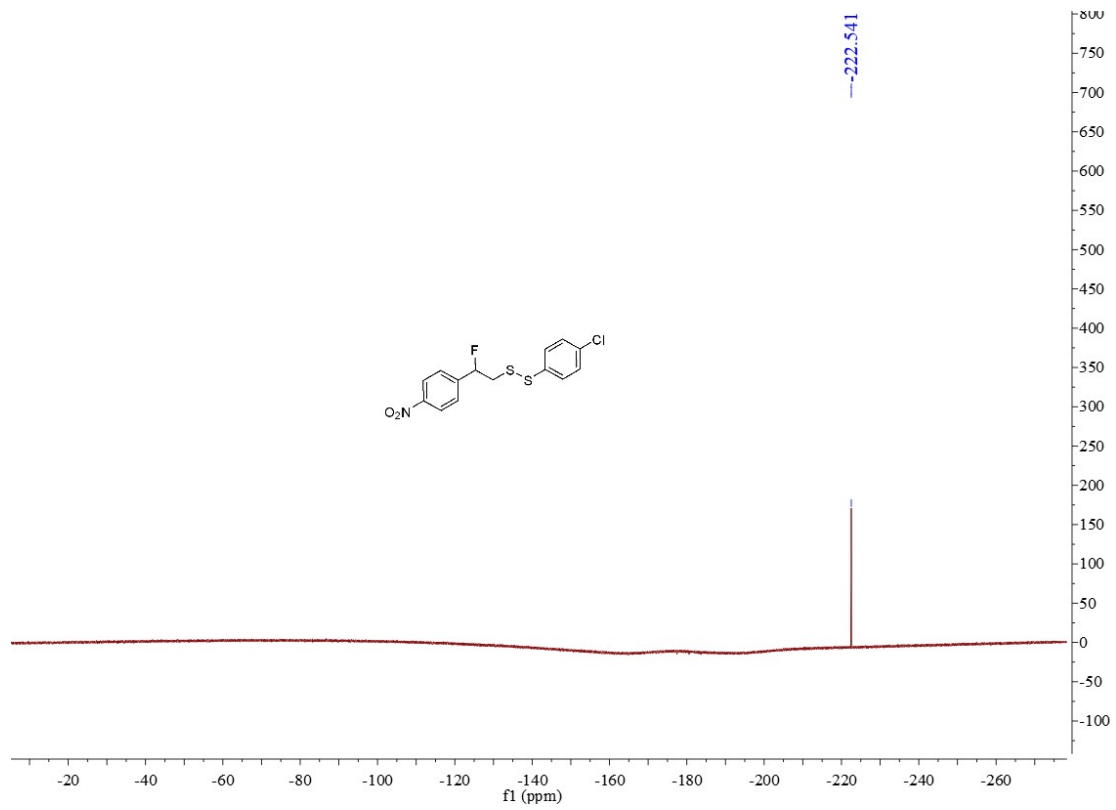

C26

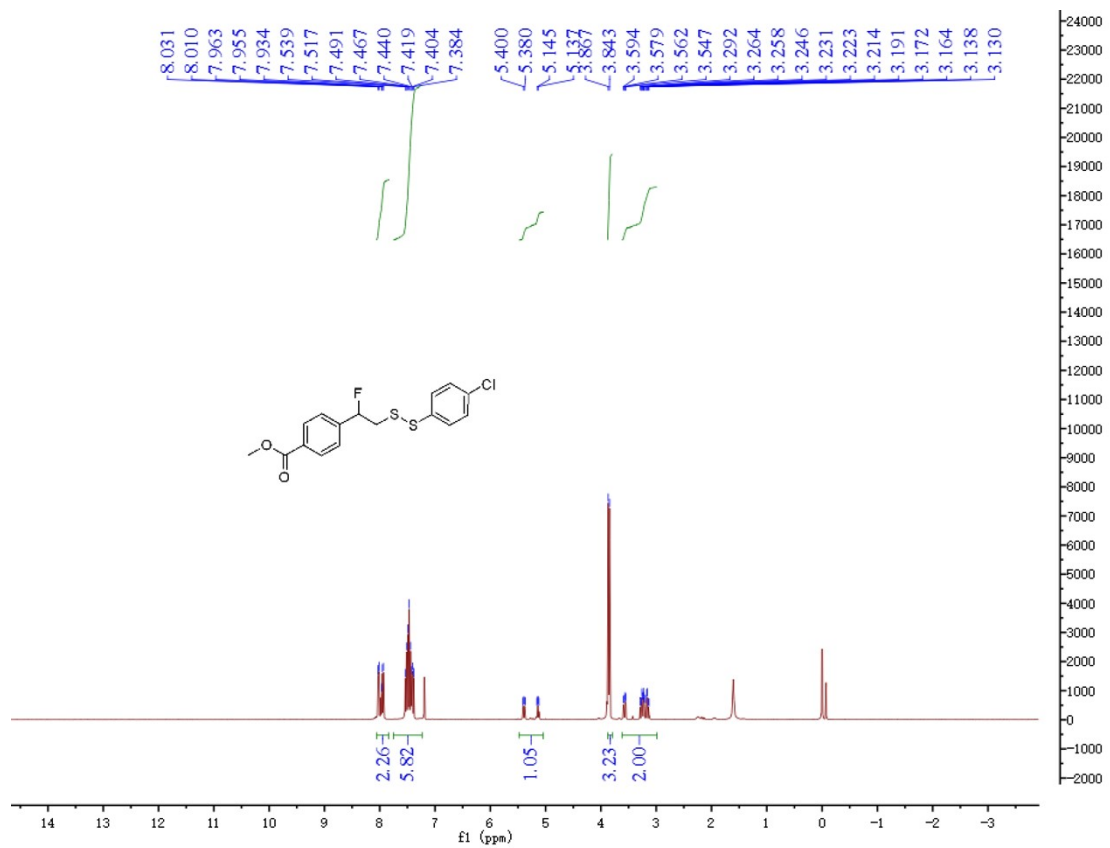

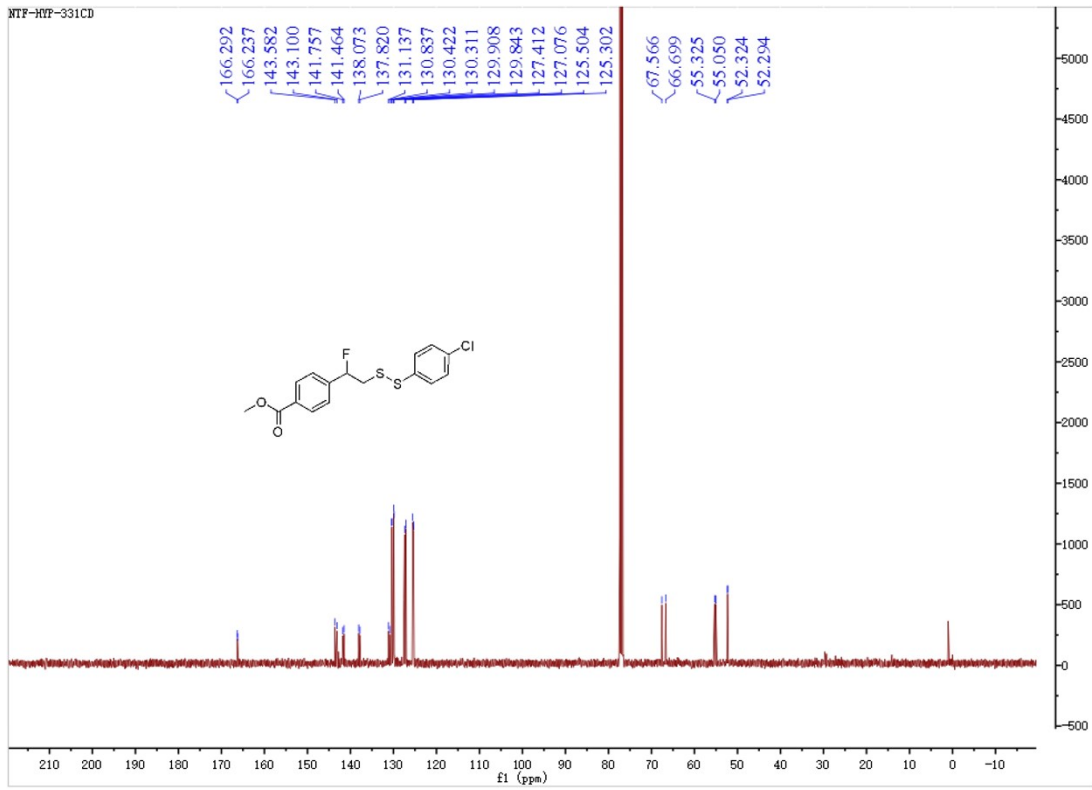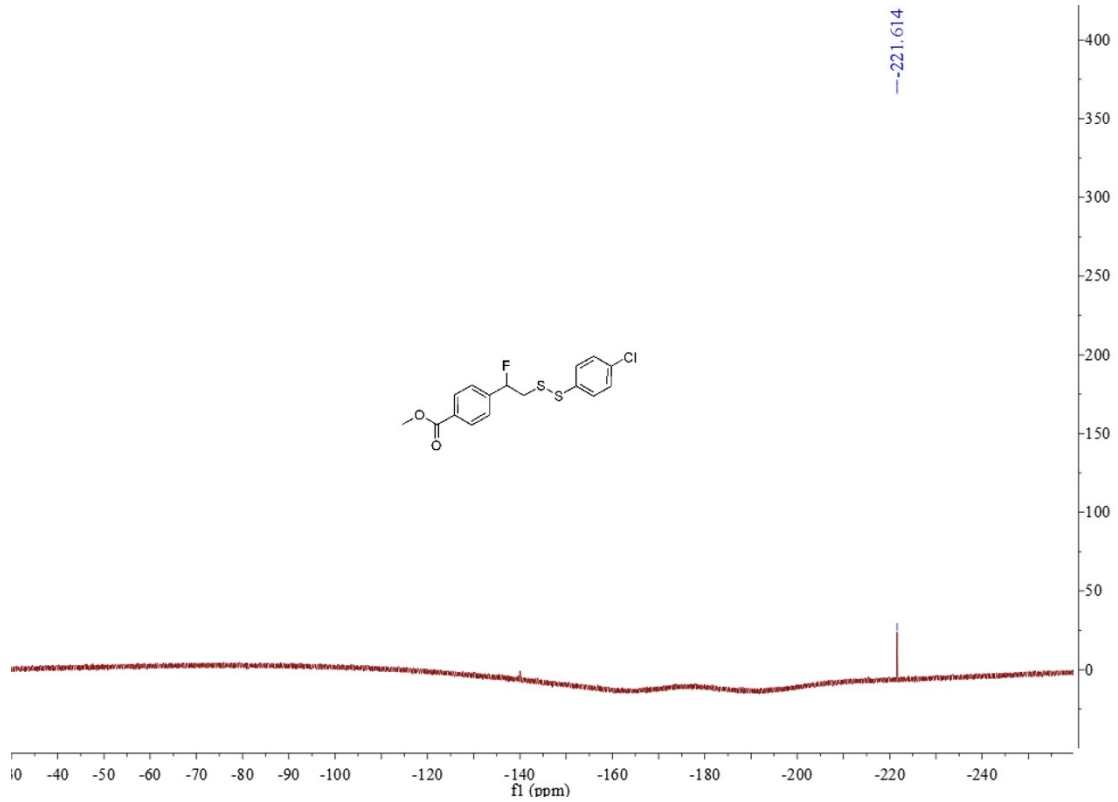

C27

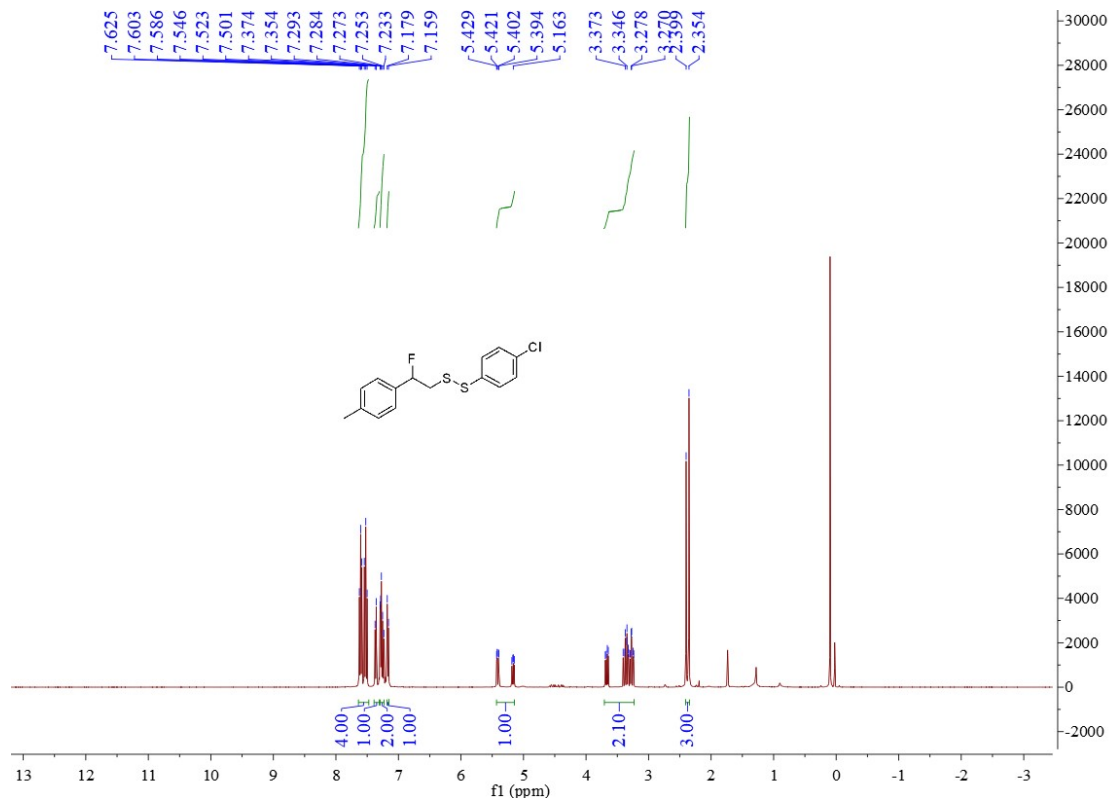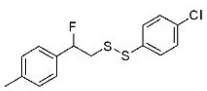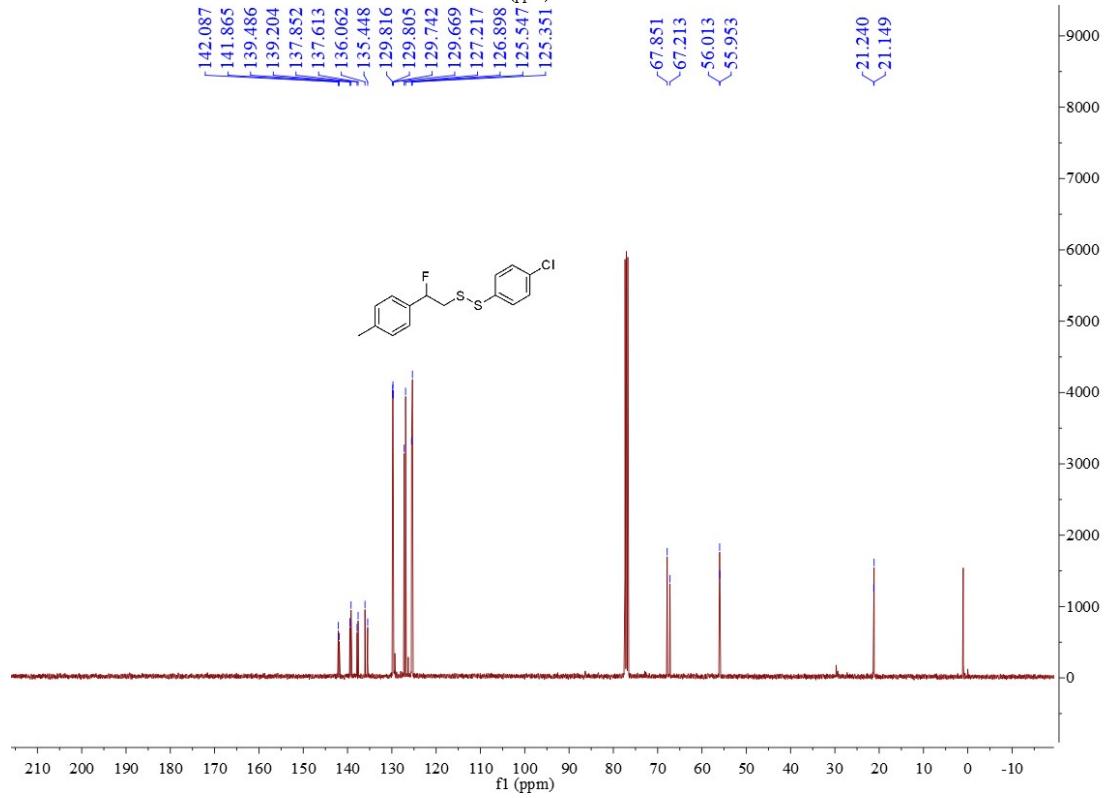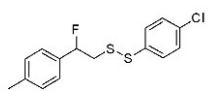

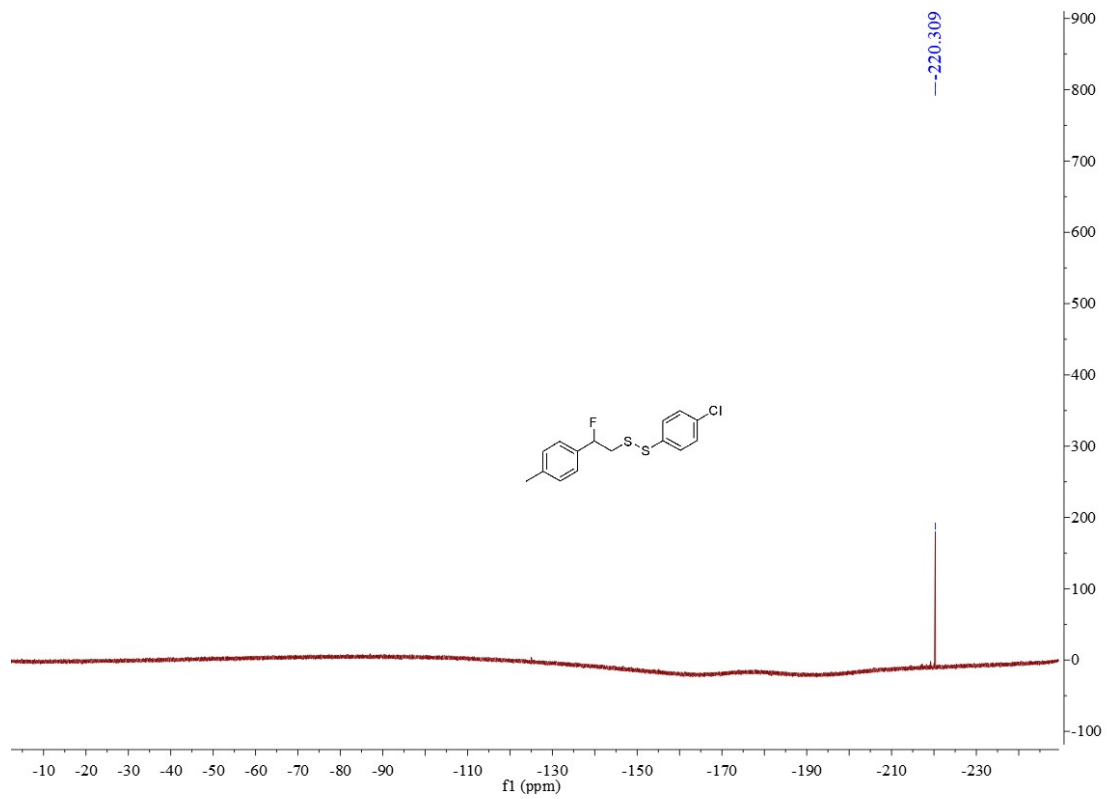

C28

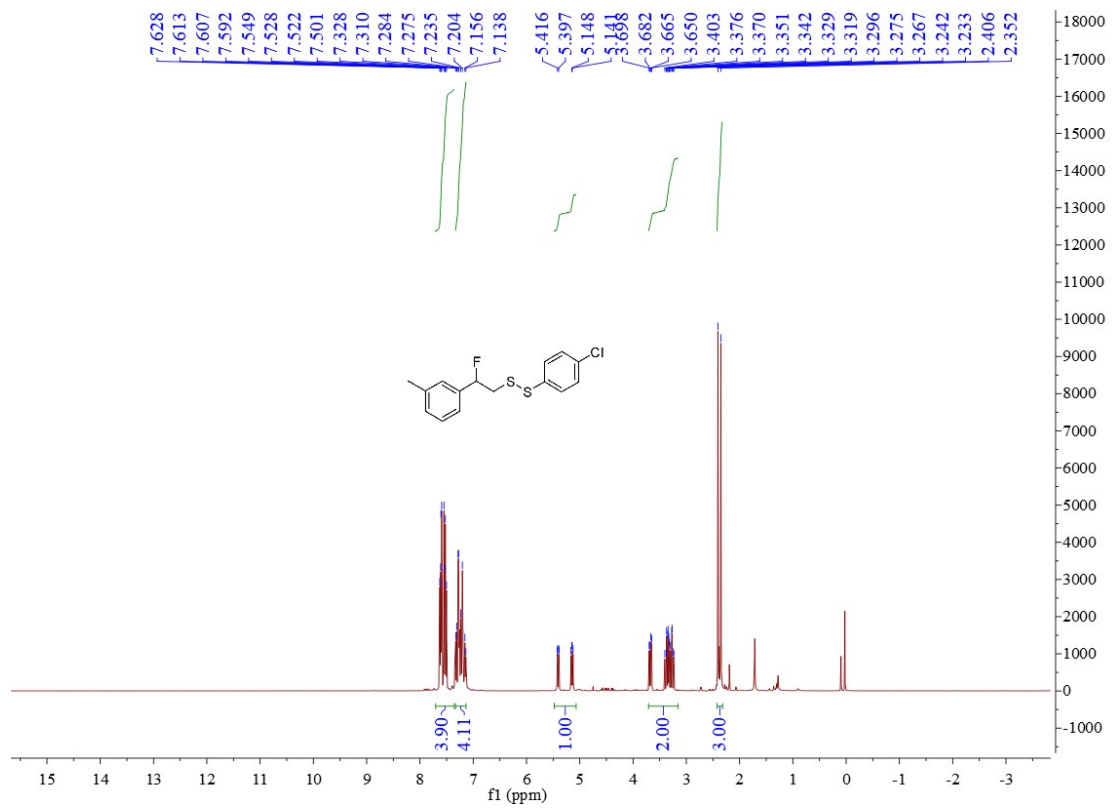

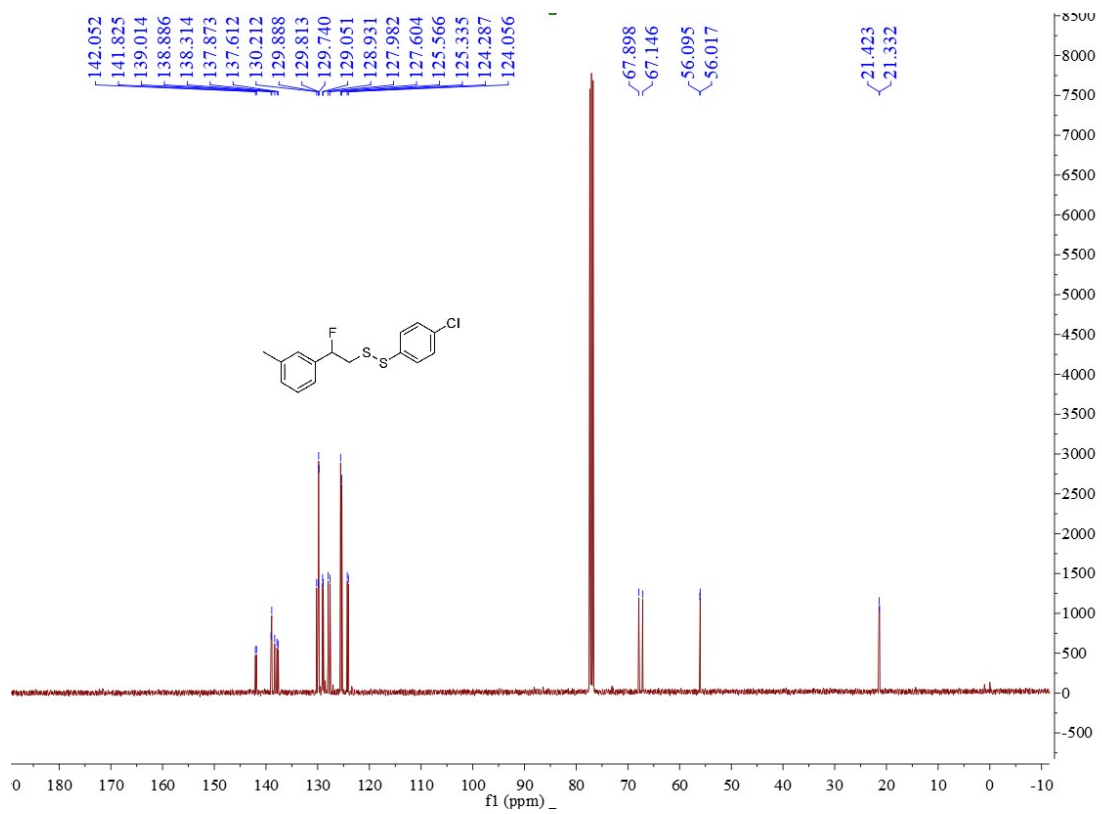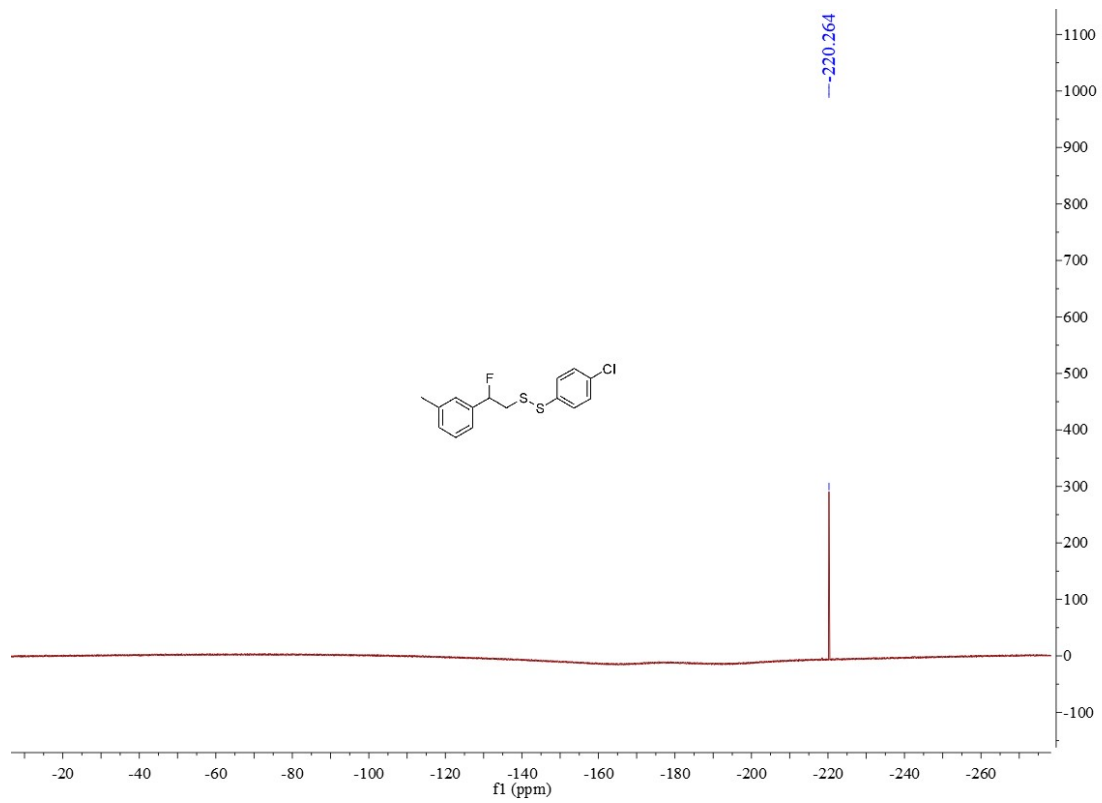

C29

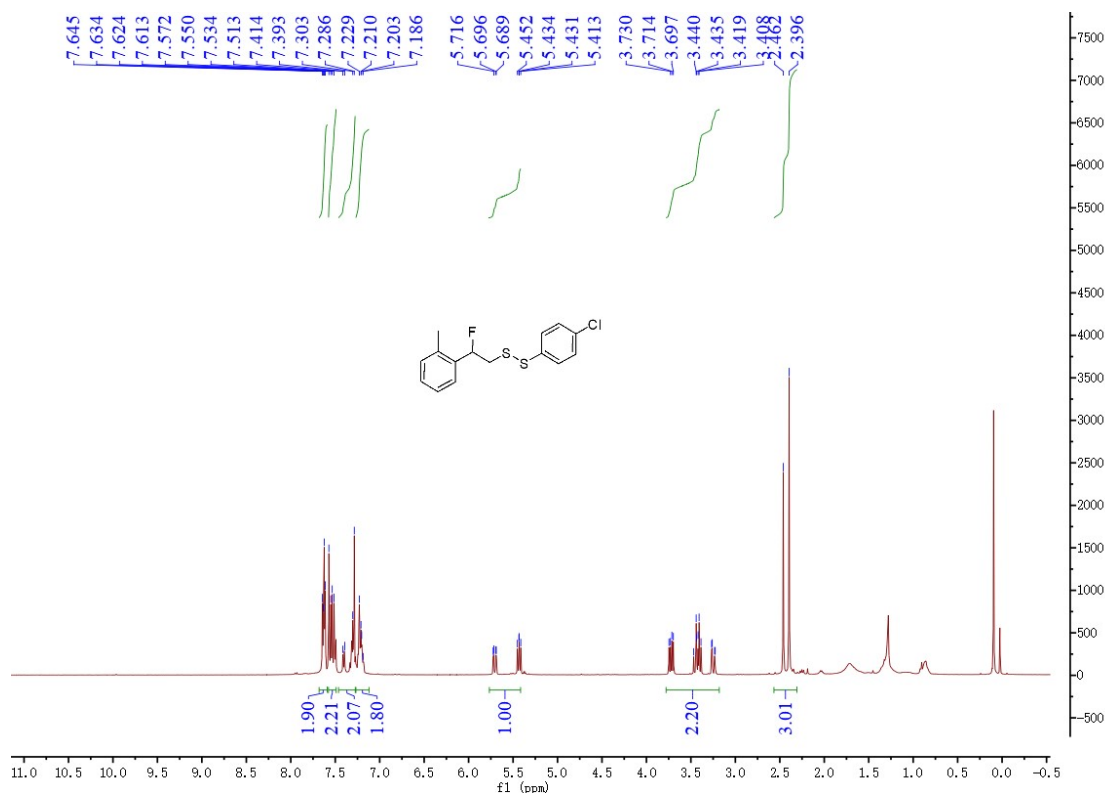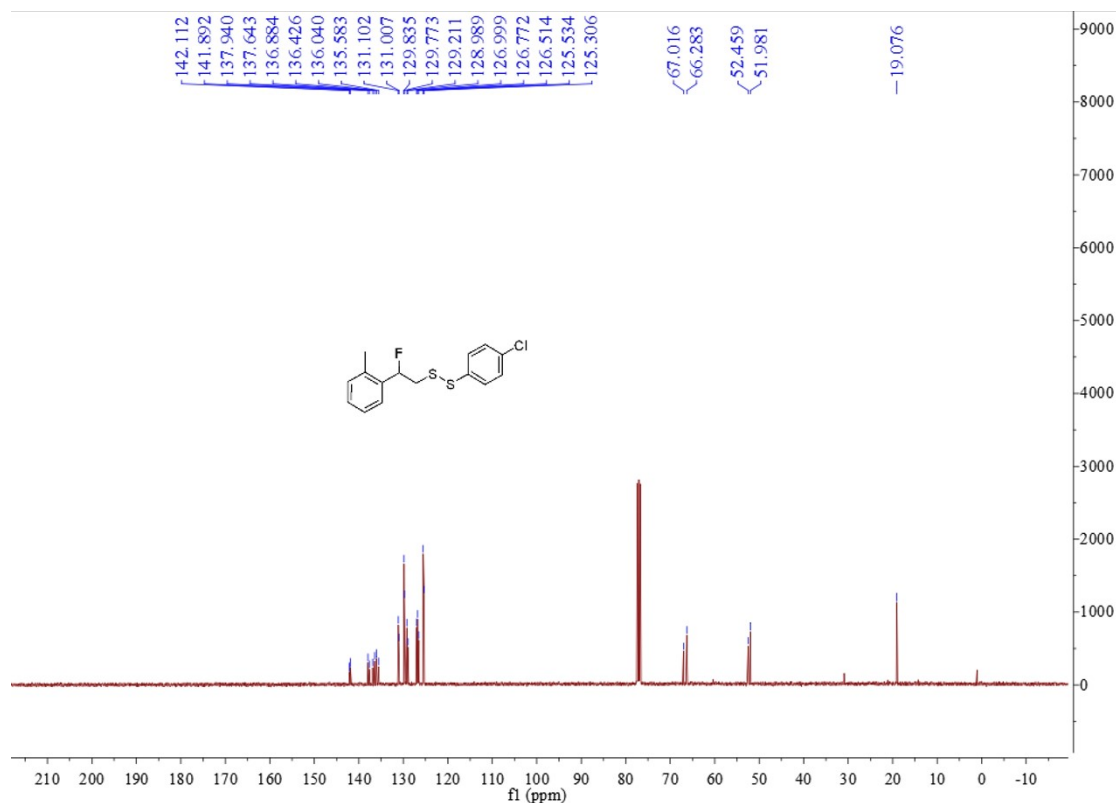

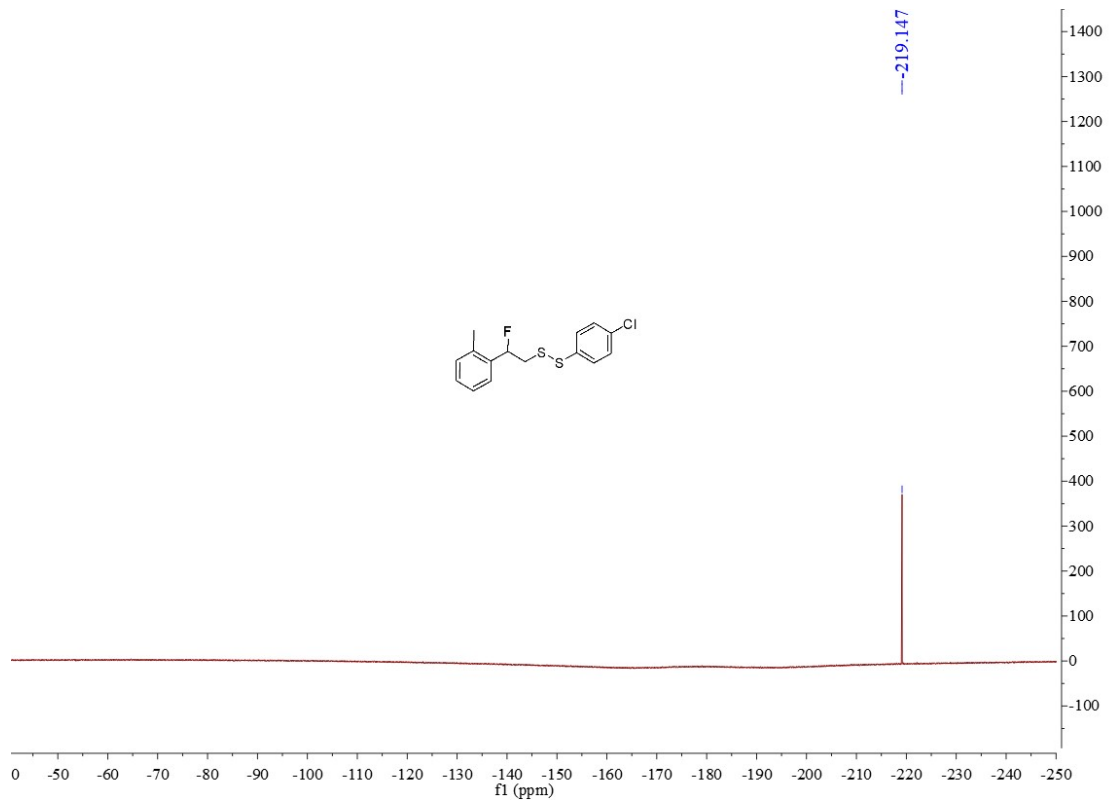

C30

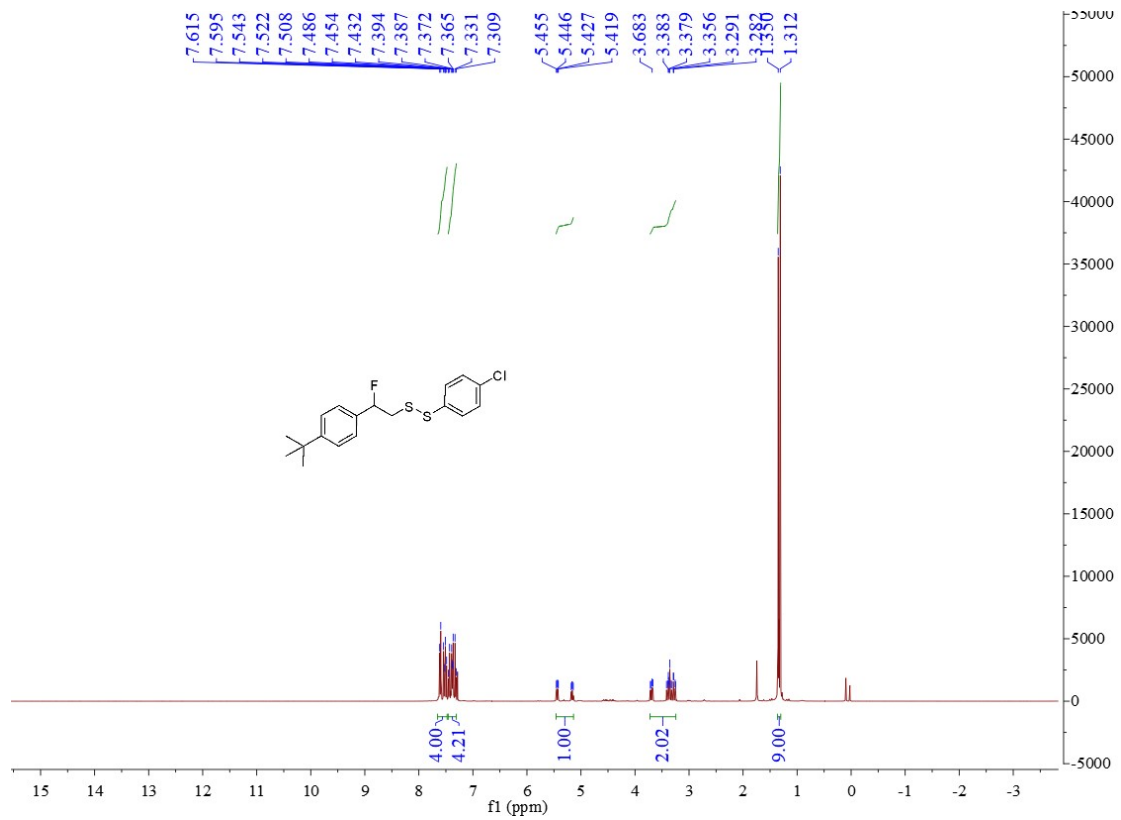

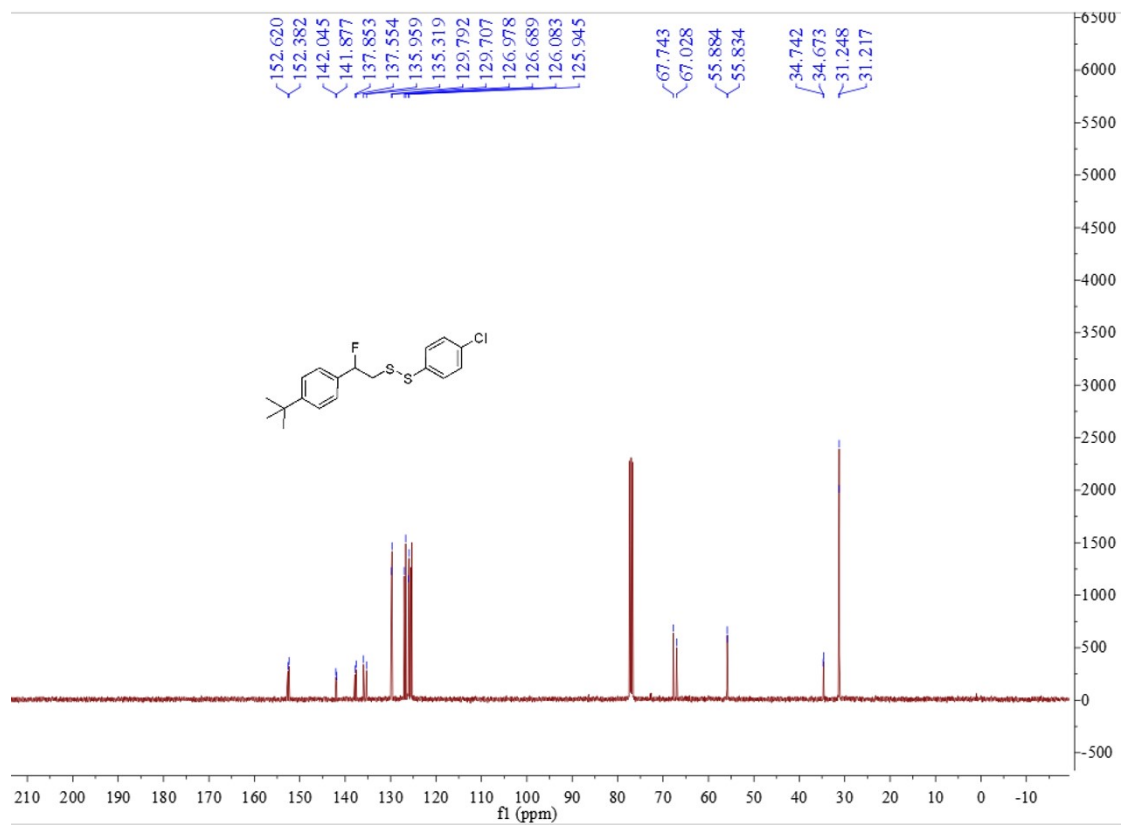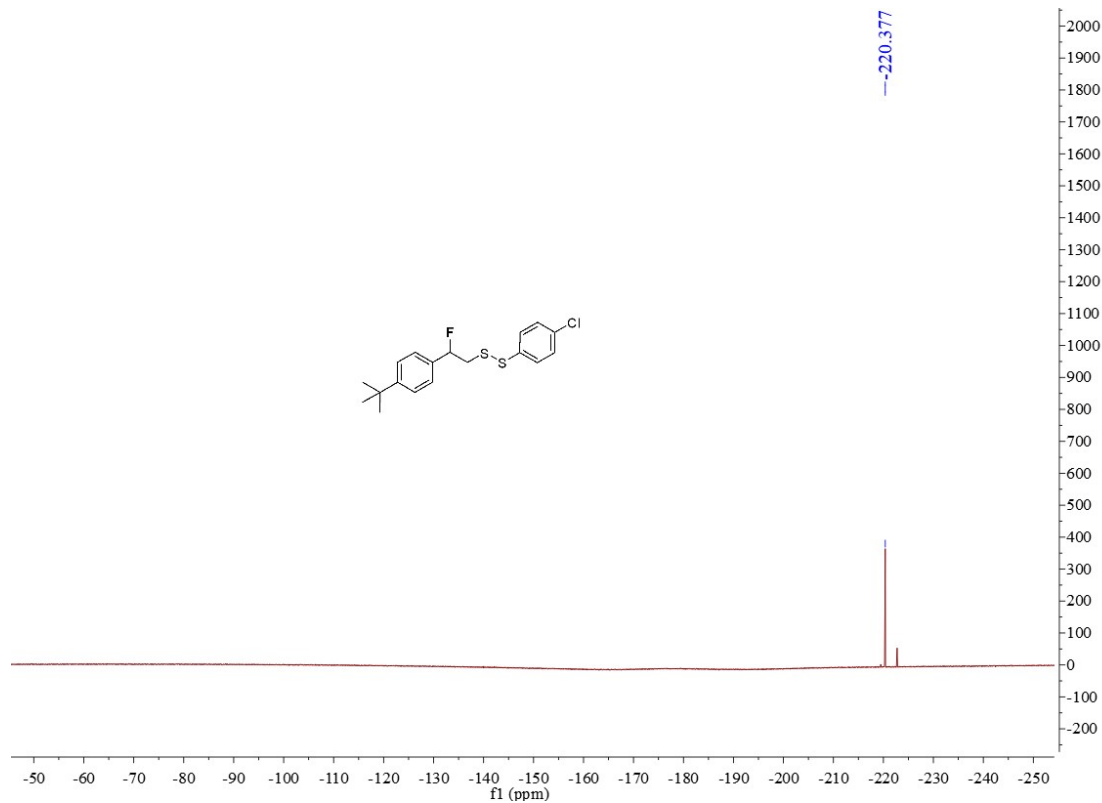



C31

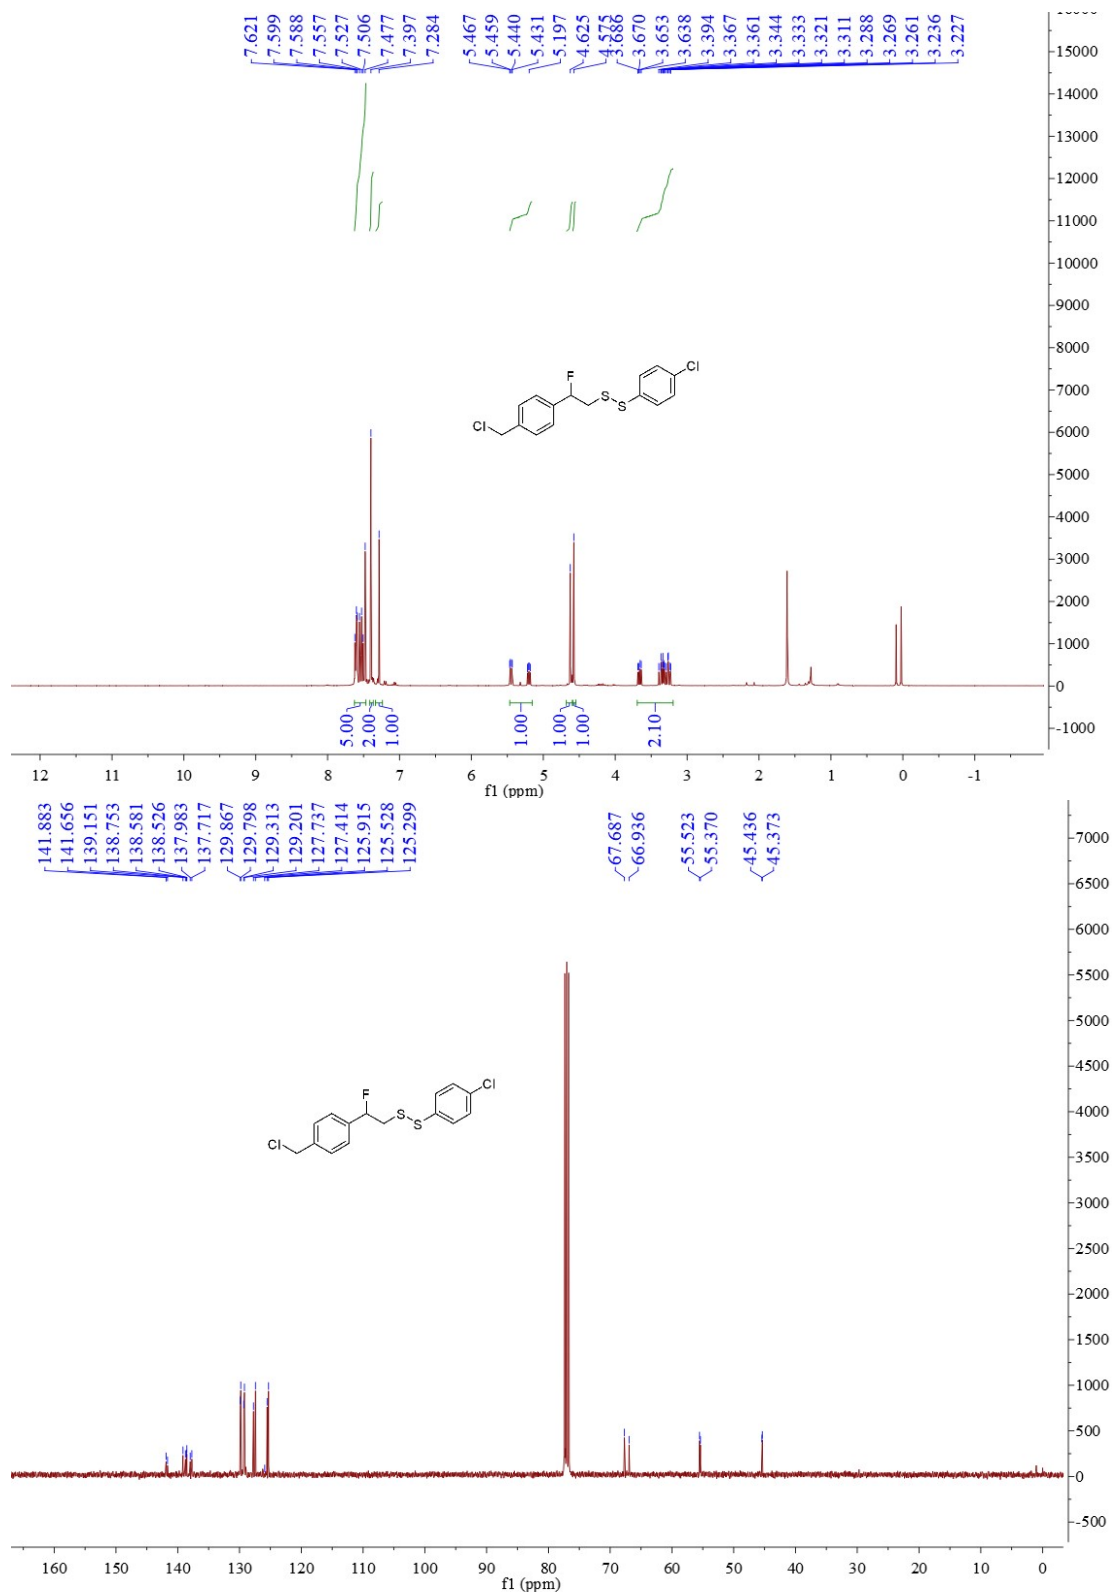

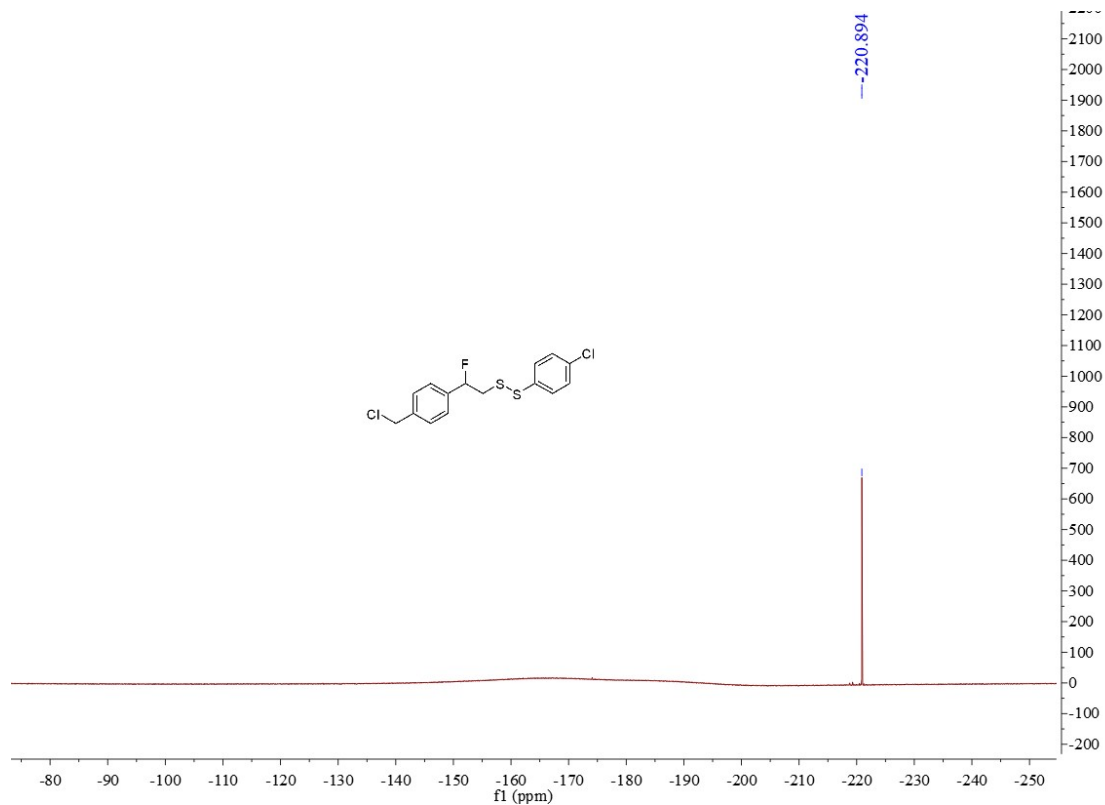

**C32**

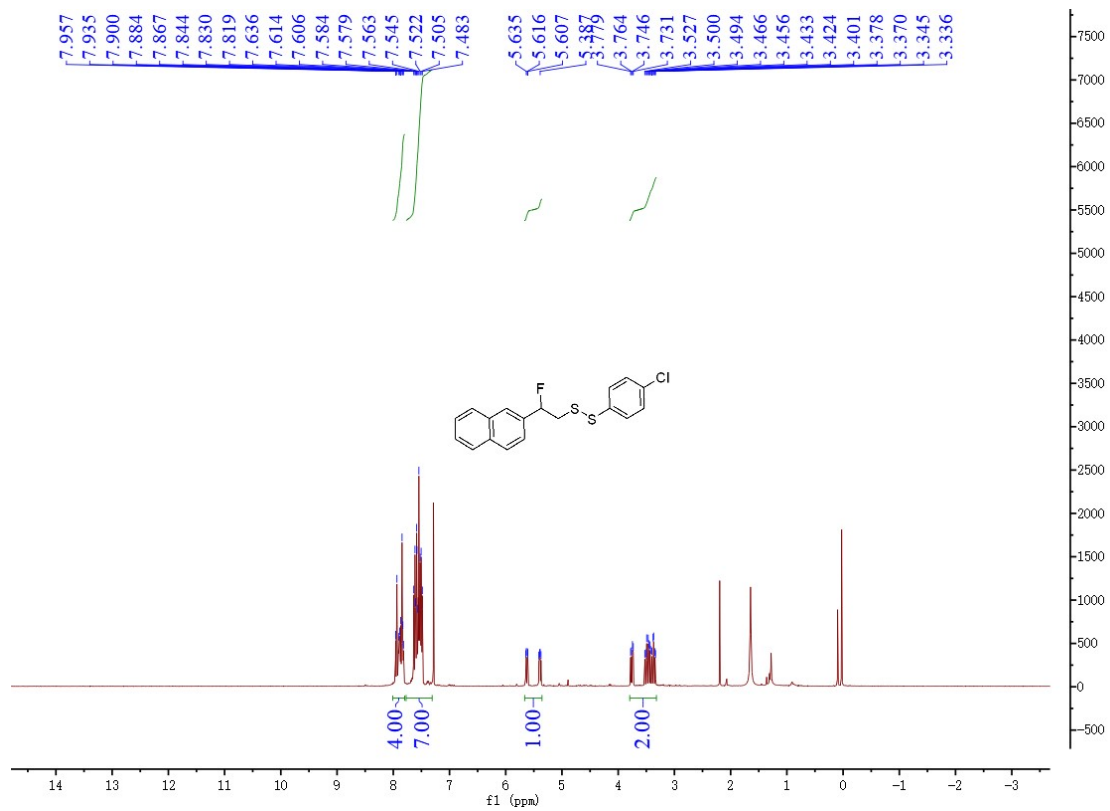

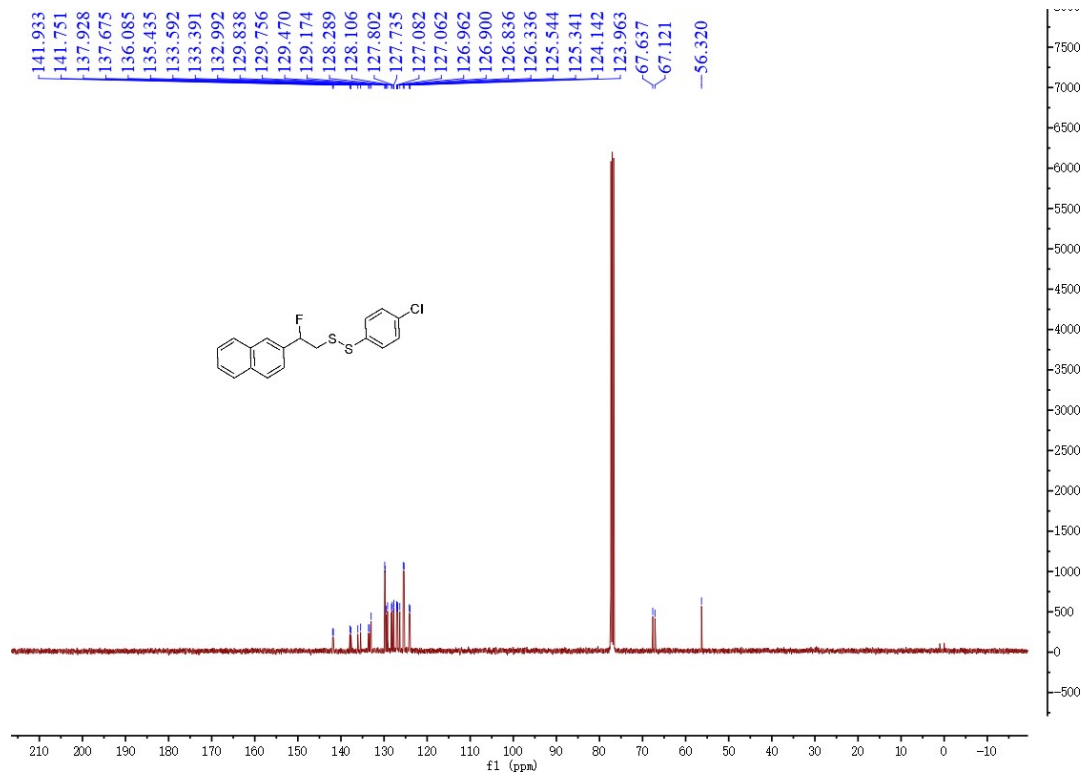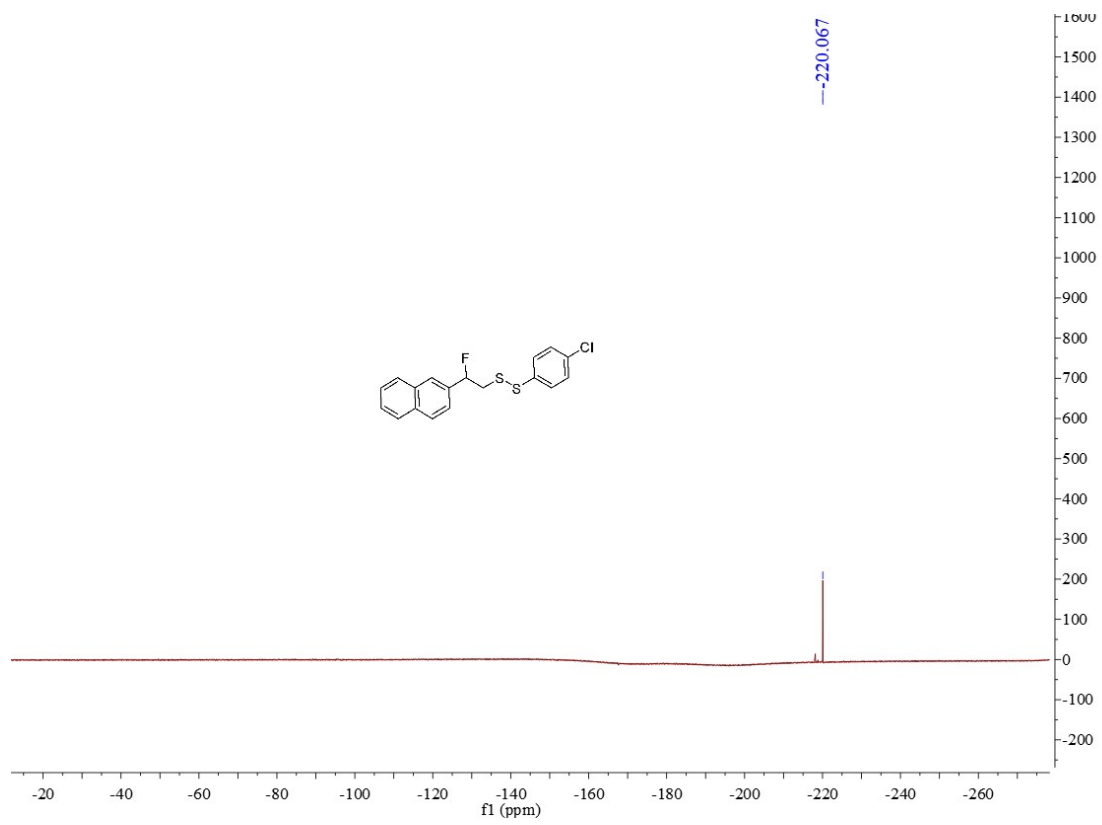

C33

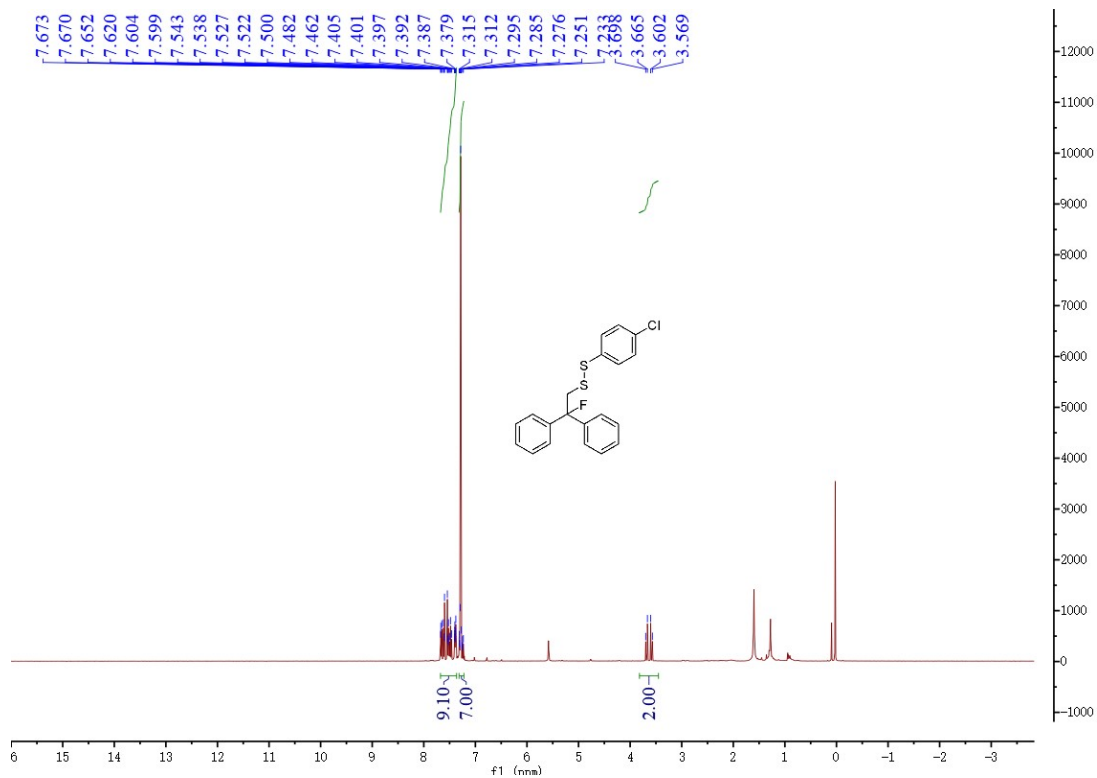

TFP-HYP-391CD

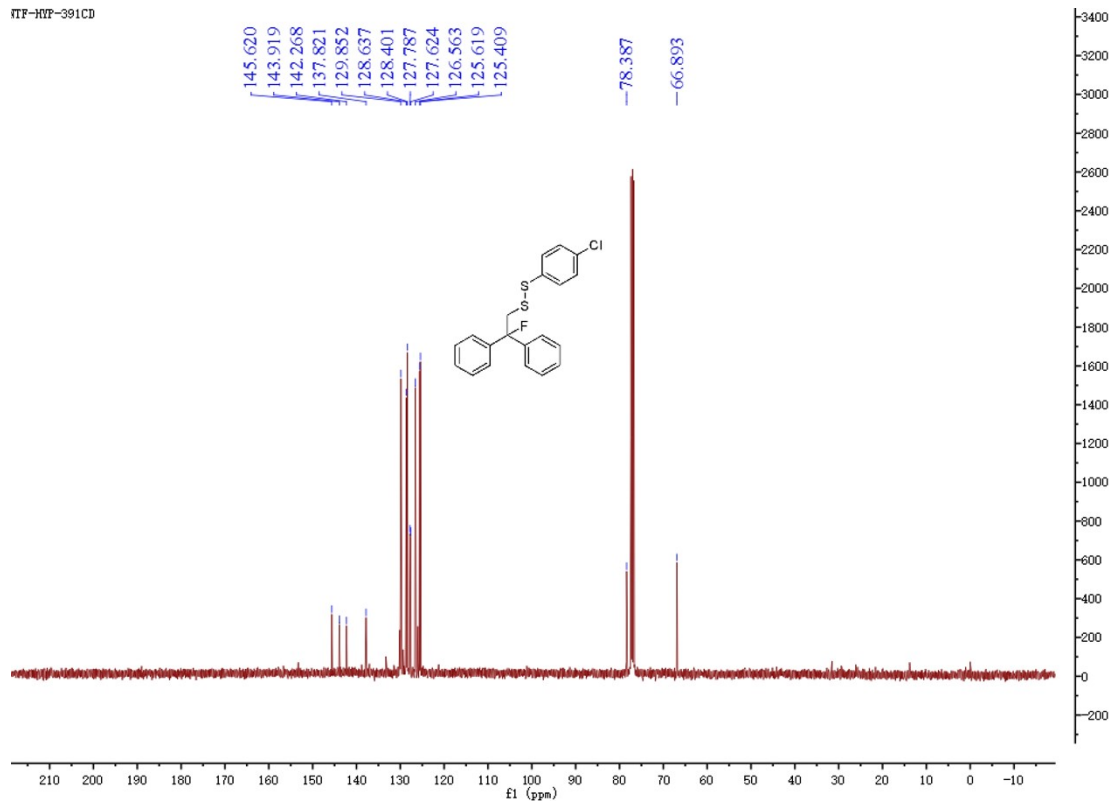

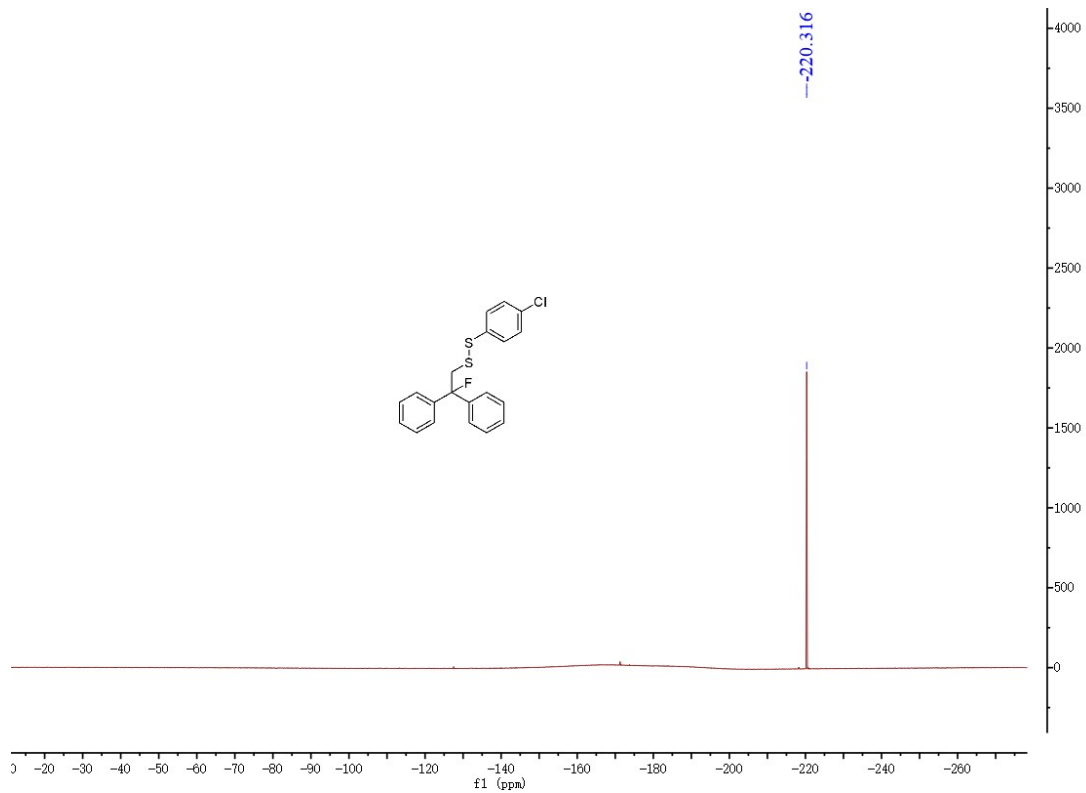

C34

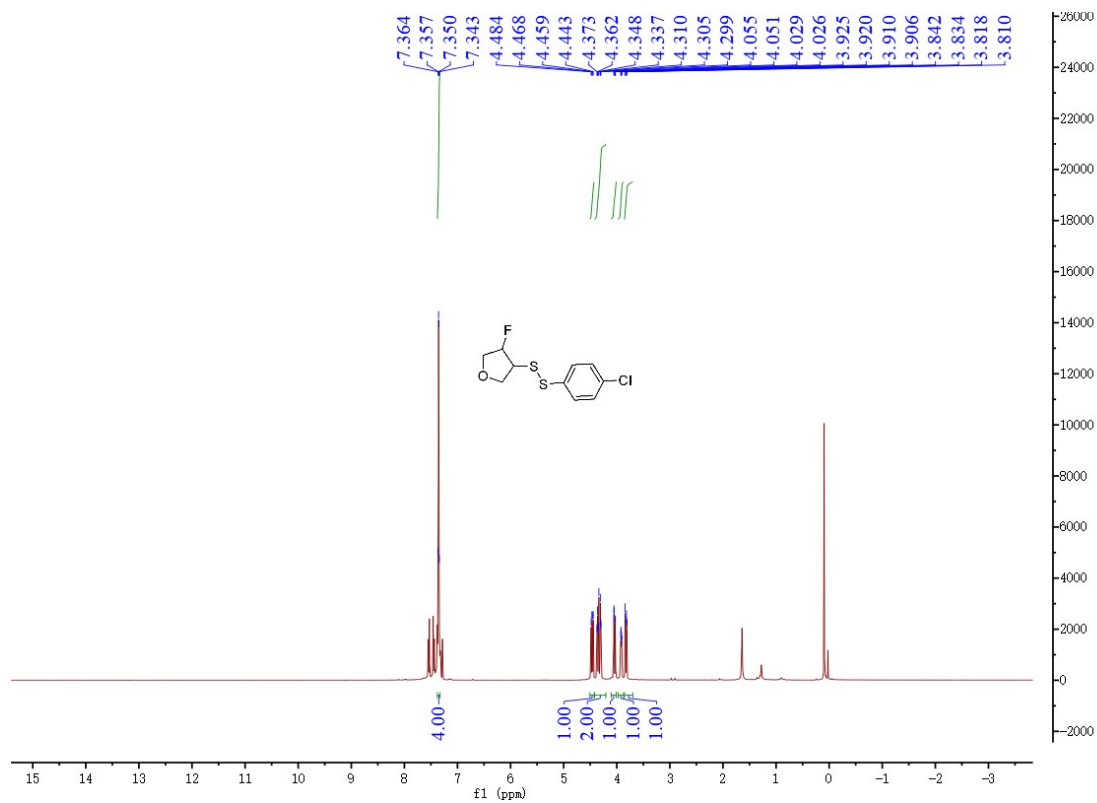

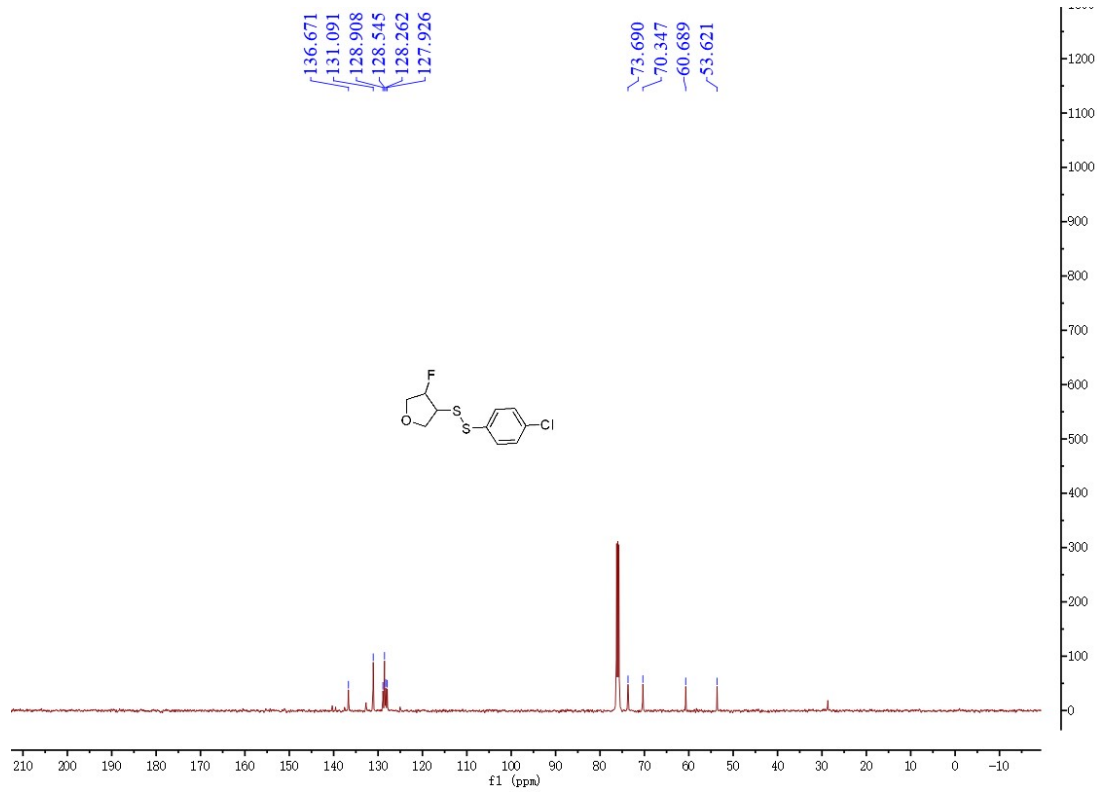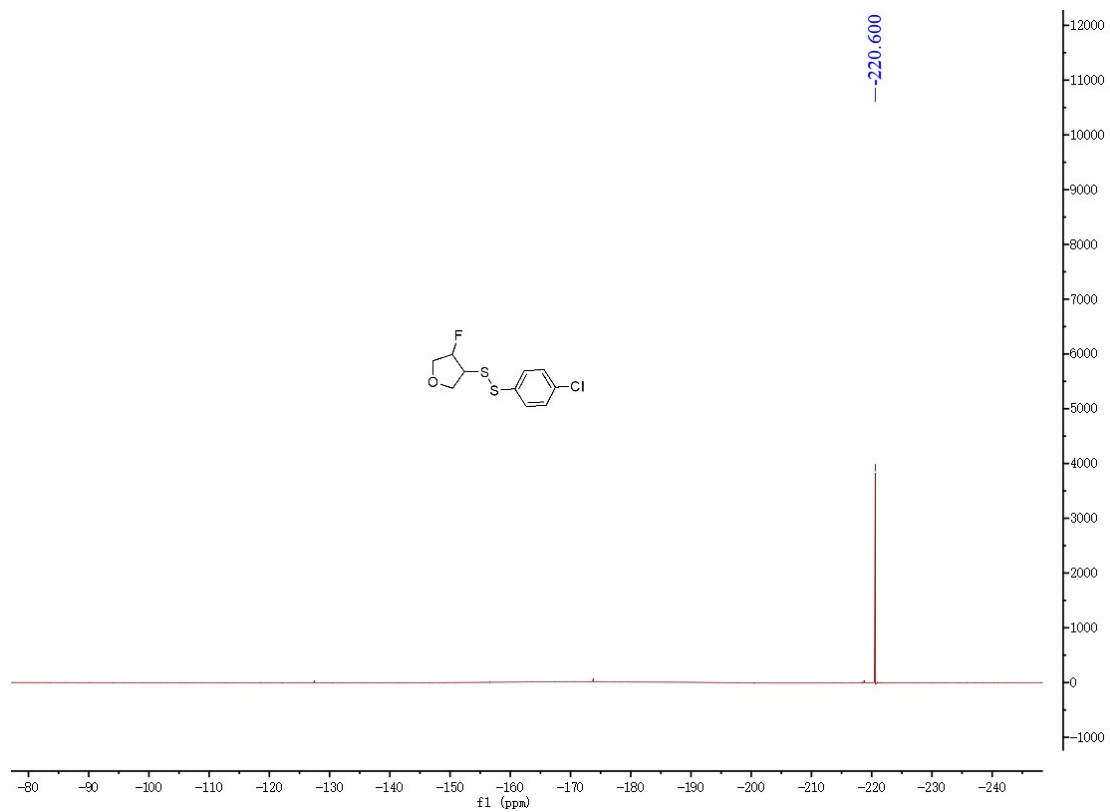

C35

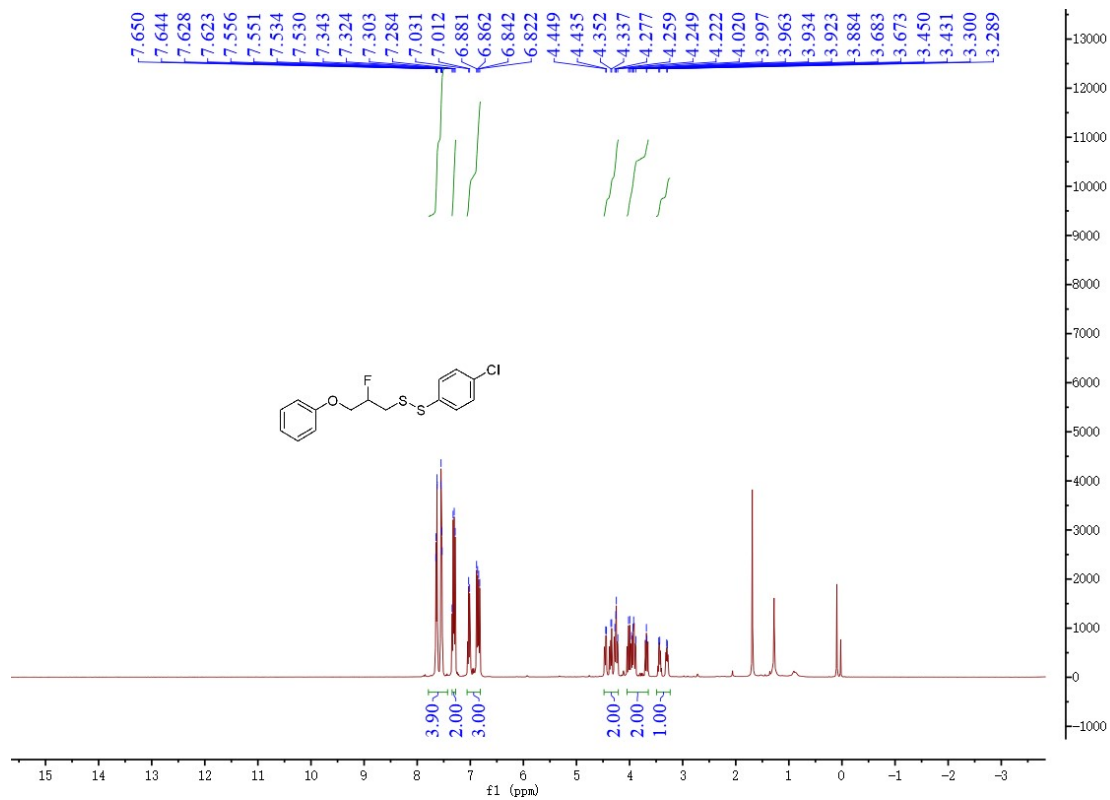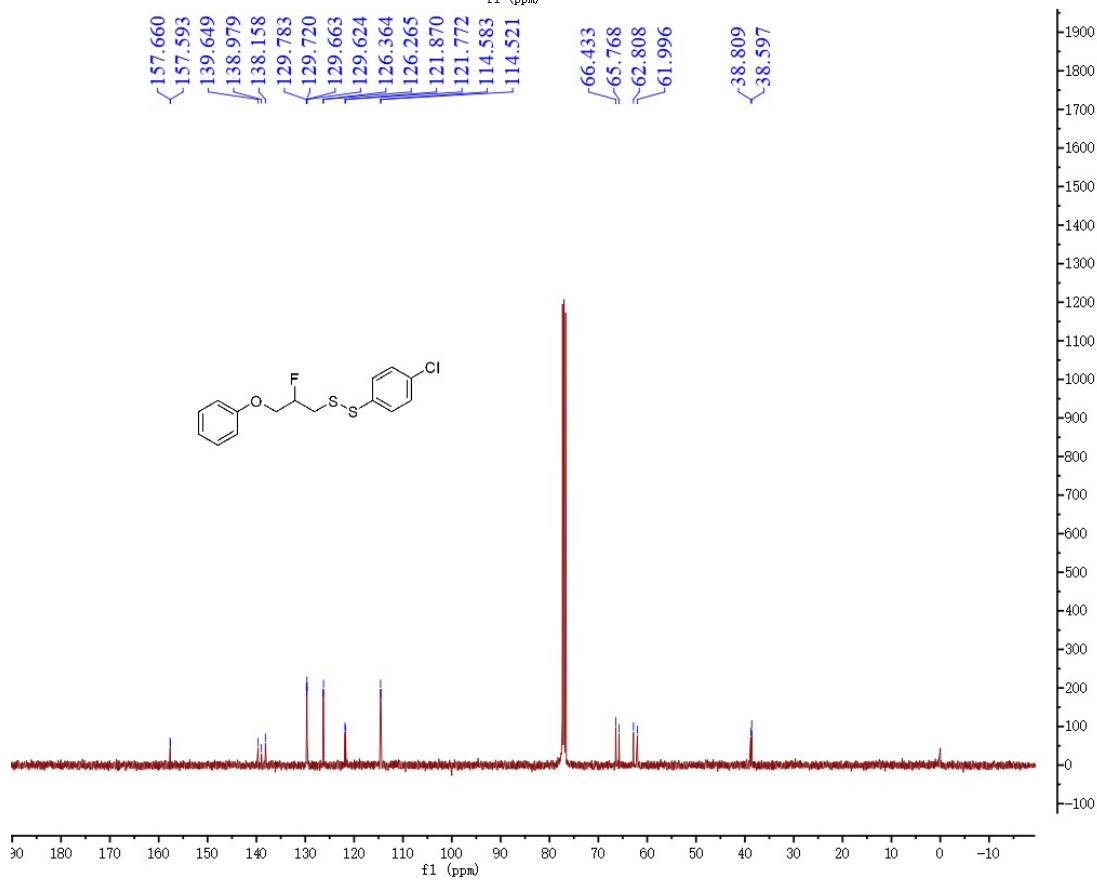

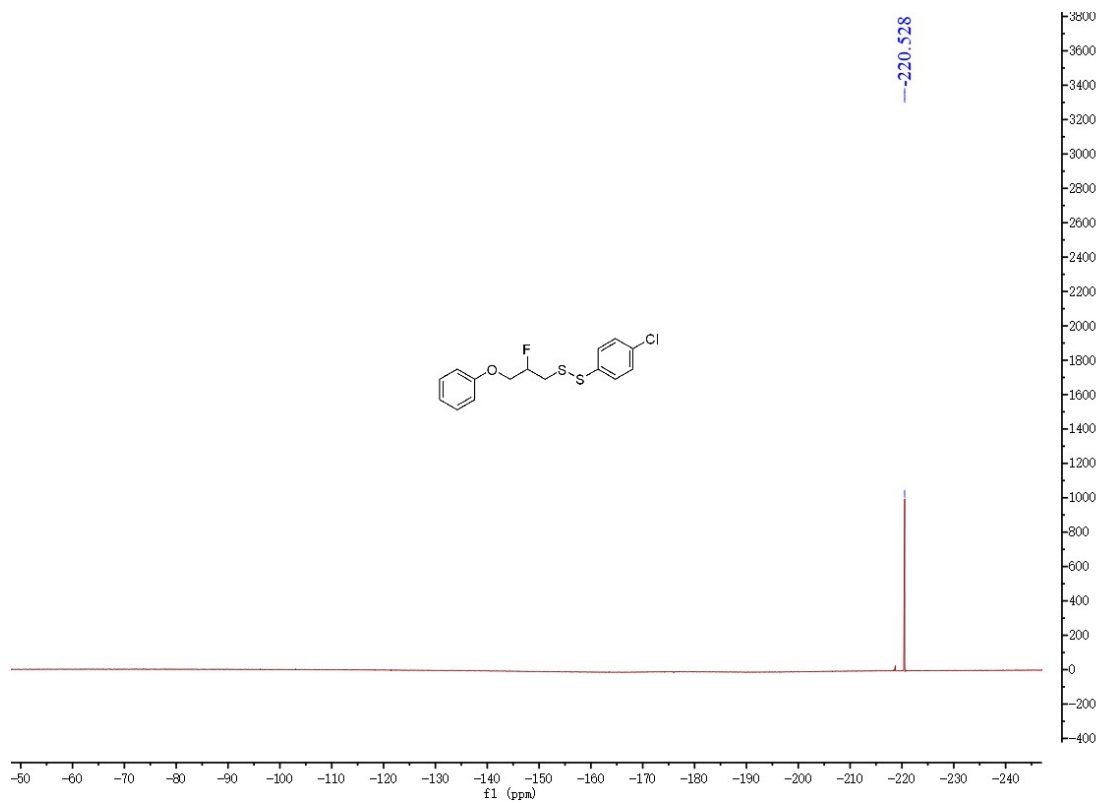

**C36**

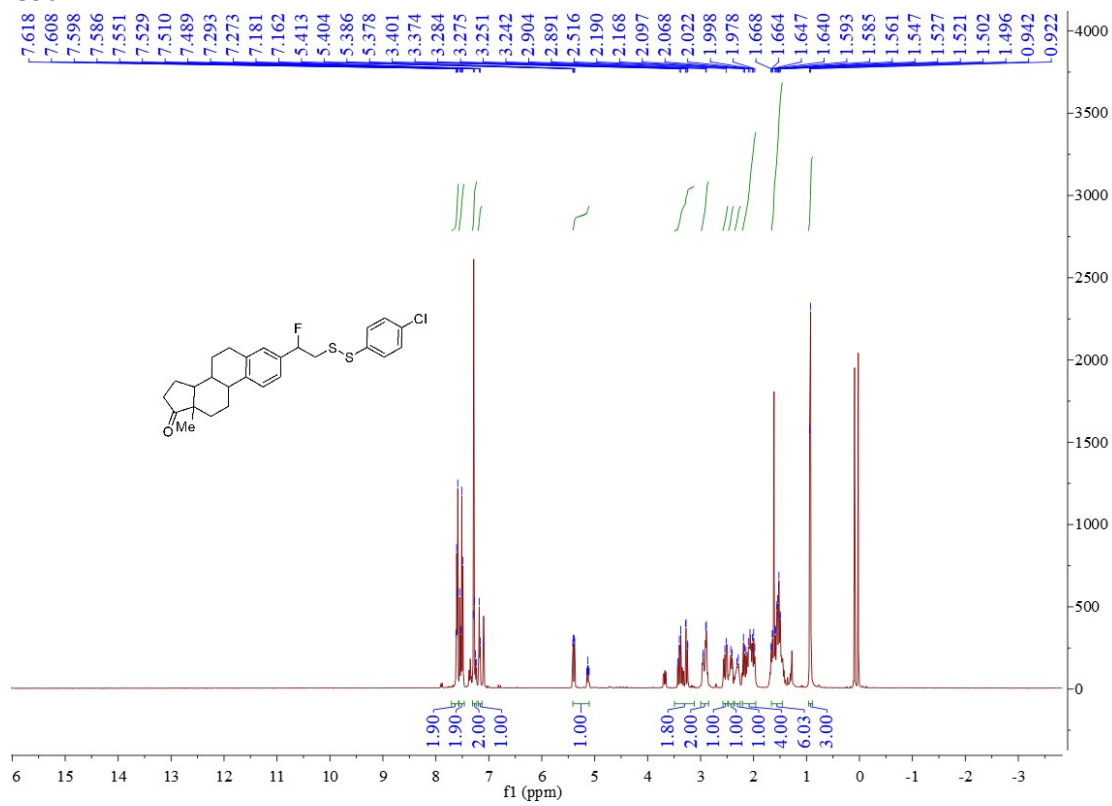



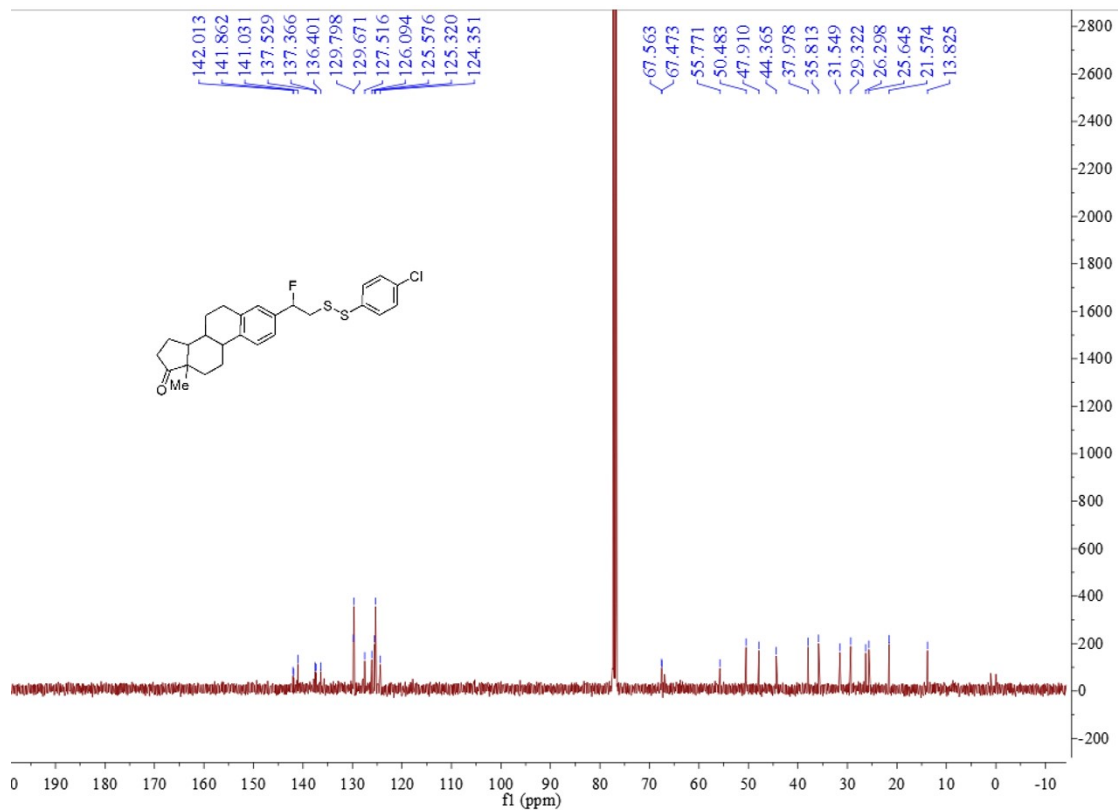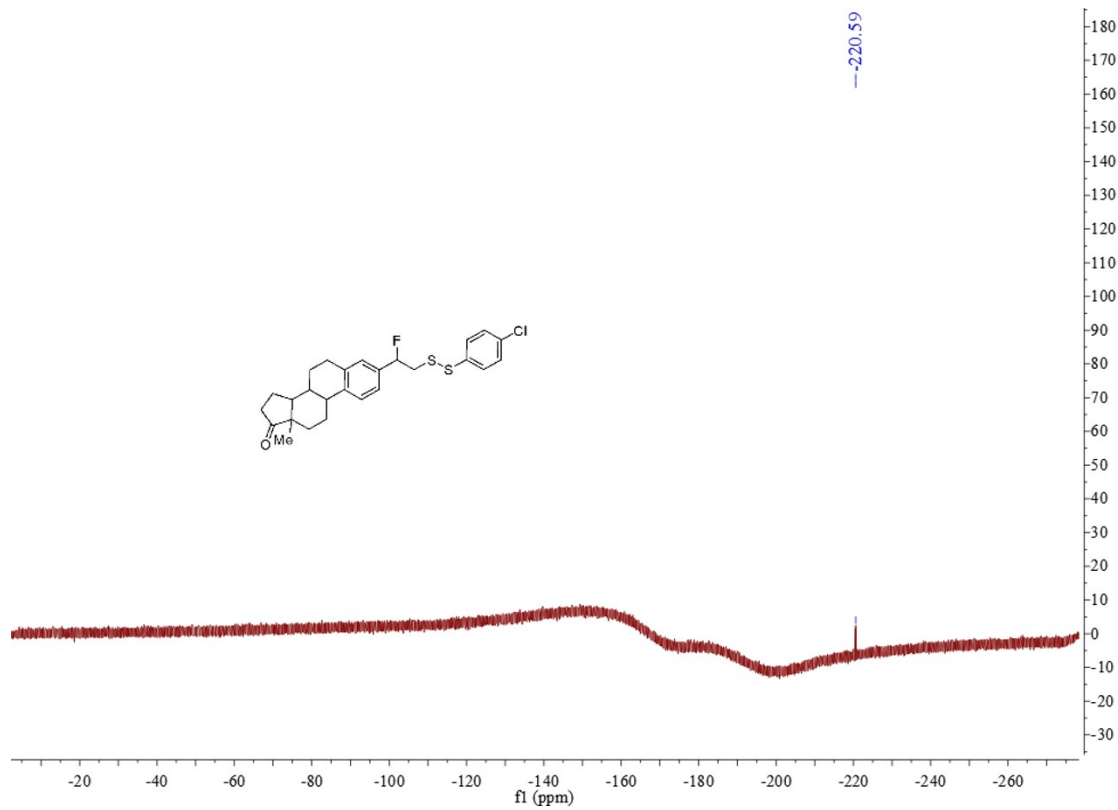

Supplement: d4cc04065a1.pdf [file d4cc04065a1.pdf]
